1 **Aminoglycoside tolerance in *Vibrio cholerae* engages translational reprogramming associated to**  
2 **queuosine tRNA modification**

3  
4  
5 Louna Fruchard <sup>1,2,#</sup>, Anamaria Babosan <sup>1,#</sup>, Andre Carvalho <sup>1</sup>, Manon Lang <sup>1</sup>, Blaise Li <sup>3</sup>, Magalie  
6 Duchateau <sup>4</sup>, Quentin Giai-Gianetto <sup>4,5</sup>, Mariette Matondo <sup>4</sup>, Frédéric Bonhomme <sup>6</sup>, Isabelle Hatin <sup>7</sup>,  
7 Hugo Arbes <sup>7</sup>, Céline Fabret <sup>7</sup>, Guillaume Sanchez <sup>8</sup>, Virginie Marchand <sup>8</sup>, Yuri Motorin <sup>8</sup>, Olivier Namy  
8 <sup>7</sup>, Valérie de Crécy-Lagard <sup>9,10</sup>, Didier Mazel <sup>1,\*</sup>, Zeynep Baharoglu <sup>1,\*</sup>.

9  
10  
11 # equal contribution

12 \*Corresponding authors: [baharogl@pasteur.fr](mailto:baharogl@pasteur.fr), [mazel@pasteur.fr](mailto:mazel@pasteur.fr)

- 13  
14  
15 1. Institut Pasteur, Université de Paris Cité, Unité Plasticité du Génome Bactérien, UMR3525,  
16 CNRS, 75015, Paris, France  
17 2. Sorbonne Université, Collège Doctoral, F-75005, Paris, France  
18 3. Institut Pasteur, Université Paris Cité, Bioinformatics and Biostatistics Hub, F-75015 Paris,  
19 France  
20 4. Institut Pasteur, Université de Paris, Proteomics Platform, Mass Spectrometry for Biology Unit,  
21 UAR2024, CNRS 2000, Paris, France.  
22 5. Institut Pasteur, Université de Paris, Department of Computation Biology, Bioinformatics and  
23 Biostatistics Hub, Paris, France.  
24 6. Institut Pasteur, Université Paris cité, Epigenetic Chemical Biology Unit, UMR 3523, CNRS,  
25 75015, Paris, France  
26 7. Université Paris-Saclay, CEA, CNRS, Institute for Integrative Biology of the Cell (I2BC), F-91198,  
27 Gif-sur-Yvette, France  
28 8. Université de Lorraine, CNRS, Inserm, UAR2008/US40 IBSLor, Epitranscriptomics and RNA  
29 Sequencing Core Facility and UMR7365 IMoPA, F-54000, Nancy, France  
30 9. Department of Microbiology and Cell Science, University of Florida, Gainesville, Florida 32611,  
31 United States.  
32 10. University of Florida Genetics Institute, Florida 32611, United States  
33

34  
35  
36 **Abstract**

37 Tgt is the enzyme modifying the guanine (G) in tRNAs with GUN anticodon to queuosine (Q). *tgt* is  
38 required for optimal growth of *Vibrio cholerae* in the presence of sub-lethal aminoglycoside  
39 concentrations. We further explored here the role of the Q in the efficiency of codon decoding upon  
40 tobramycin exposure. We characterized its impact on the overall bacterial proteome, and elucidated  
41 the molecular mechanisms underlying the effects of Q modification in antibiotic translational stress  
42 response. Using molecular reporters, we showed that Q impacts the efficiency of decoding at tyrosine  
43 TAT and TAC codons. Proteomics analyses revealed that the anti-SoxR factor RsaA is better translated  
44 in the absence of *tgt*. RsaA displays a codon bias towards tyrosine TAT and overabundance of RsaA  
45 leads to decreased expression of genes belonging to SoxR oxidative stress regulon. We also identified  
46 conditions that regulate *tgt* expression. We propose that regulation of Q modification in response to  
47 environmental cues leads to translational reprogramming of genes bearing a biased tyrosine codon  
48 usage. *In silico* analysis further identified candidate genes possibly subject to such translational  
49 regulation, among which DNA repair factors. Such transcripts, fitting the definition of modification  
50 tunable transcripts, are plausibly central in the bacterial response to antibiotics.

## 51 Introduction

52

53 Antimicrobial resistance is an increasingly serious threat to global public health. Our recent finding  
54 that many tRNA modification genes are involved in the response to antibiotics from different families  
55 (1) led to further investigate the links between environmental factors (e.g. traces of antibiotics), tRNA  
56 modifications and bacterial survival to antibiotics.

57 The regulatory roles of RNA modifications was first proposed for eukaryotes(2) and their importance  
58 in human diseases has recently emerged(3,4). In bacteria, while some tRNA modifications are  
59 essential(5), the absence of many RNA modification shows no growth phenotype in unstressed cells(6).  
60 At the molecular level, the roles of tRNA modifications in differential codon decoding have been  
61 described in various species(7-10). In most cases, no growth phenotype was associated with these  
62 variations in decoding in bacteria. Recent studies, however, do highlight the links between tRNA  
63 modifications and stress responses in several bacterial species(6,11-17), and new modifications are  
64 still being discovered(18). Until recently, few tRNA modification factors have been clearly linked with  
65 resistance and persistence to antibiotics, via differential codon decoding in cell membrane and efflux  
66 proteins (TrmD(19), MiaA(8)). A link between stress and adaptation was described to occur via the  
67 existence of modification tunable transcripts, or MoTTs.

68 MoTTs were first (and mostly) defined in eukaryotes as transcripts that will be translated more or  
69 less efficiently depending on the presence or absence of tRNA modifications(20), namely upon  
70 stress(21). In bacteria, links between tRNA modifications and the response to several stresses are  
71 highlighted by studies focusing on the following MoTT/codon and tRNA modification couples  
72 (reviewed in(6)): differential translation of RpoS/leucine codons via MiaA (*E. coli*)(12); Fur/serine  
73 codons via MiaB, in response to low iron (*E. coli*)(13); MgtA/proline codons via TrmD, in response to  
74 low magnesium(14); catalases/phenylalanine and aspartate codons via TrmB, during oxidative stress  
75 (*P. aeruginosa*)(11). Mycobacterial response to hypoxic stress(15) also features MoTTs. In this latter  
76 study, specific stress response genes were identified *in silico*, through their codon usage bias, and then  
77 experimentally confirmed for their differential translation. tRNA modification-dependent translational  
78 reprogramming in response to antibiotic stress has not been the focus of a study so far in bacteria.

79 During studies in *V. cholerae*, we recently discovered that t/rRNA modifications play a central role  
80 in response to stress caused by antibiotics with very different modes of action (1), not through  
81 resistance development, but by modulating tolerance. The identified RNA modification genes had not  
82 previously been associated with any antibiotic resistance phenotype. The fact that different tRNA  
83 modifications have opposite effects on tolerance to different antibiotics highlights the complexity of  
84 such a network, and shows that the observed phenotypes are not merely due to a general  
85 mistranslation effect. Since tRNA modifications affect codon decoding and accuracy, it is important to  
86 address how differential translation can generate proteome diversity, and eventually adaptation to  
87 antibiotics.

88 In particular, deletion of the *tgt* gene encoding tRNA-guanine transglycosylase (Tgt) in *V. cholerae*  
89 confers a strong growth defect in the presence of aminoglycosides at doses below the minimal  
90 inhibitory concentration (sub-MIC)(1). Tgt incorporates queuosine (Q) in the place of guanosine (G) in  
91 the wobble position of four tRNAs with GUN anticodon (tRNA-Asp GUC, tRNA-Asn GUU, tRNA-Tyr GUA,  
92 tRNA-His GUG)(22). The tRNAs with "AUN" anticodons are not present in the genome, and thus each  
93 one of the four GUN tRNAs decodes two synonymous codons (aspartate GAC/GAT, asparagine  
94 AAC/AAT, tyrosine TAC/TAT, histidine CAC/CAT which differ in the third position). Q is known to  
95 increase or decrease translation error rates in eukaryotes in a codon and organism specific  
96 manner(22,23). Q was shown to induce mild oxidative stress resistance in the eukaryotic parasite  
97 *Entamoeba histolytica*, the causative agent of amebic dysentery, and to attenuate its virulence(24). In  
98 *E. coli*, the absence of Q modification was found to decrease mistranslation rates by tRNA-Tyr, while  
99 increasing it for tRNA-Asp(25,26). No significant biological difference was found in *E. coli*  $\Delta$ *tgt* mutant,  
100 except for a slight defect in stationary phase viability(27). Recent studies show that the *E. coli* *tgt*  
101 mutant is more sensitive to aminoglycosides but not to ampicillin nor spectinomycin and is more  
102 sensitive to oxidative stress but the molecular mechanisms were not elucidated(28).

103 We asked here how queuosine (Q) modification by Tgt modulates the response to sub-MIC  
104 aminoglycosides. We find that *V. cholerae*  $\Delta$ *tgt* displays differential decoding of tyrosine TAC/TAT.  
105 Molecular reporters, coupled to proteomics and *in silico* analysis, reveal that several proteins with  
106 codon usage biased towards TAT (versus TAC) are more efficiently translated in  $\Delta$ *tgt*. One of these  
107 proteins is RsxA, which prevents activation of SoxR oxidative stress response regulon(29). We propose  
108 that sub-MIC TOB treatment leads to increased expression of *tgt* and Q modification, which in turn  
109 allows for more efficient Sox regulon related oxidative stress response, and better response to sub-  
110 MIC TOB. Lastly, bioinformatic analysis identified DNA repair gene transcripts with TAT codon bias as  
111 transcripts modulated by Q modification, which was confirmed by decreased UV susceptibility of *V.*  
112 *cholerae*  $\Delta$ *tgt*.

113

## 114 **Materials and methods**

115

### 116 **Media and Growth Conditions**

117 Platings were done at 37°C, in Mueller-Hinton (MH) agar media. Liquid cultures were grown at 37°C in  
118 MH in aerobic conditions, with 180 rotations per minute.

119

120 **Competition experiments** were performed as described(1): overnight cultures from single colonies of  
121 mutant *lacZ*<sup>+</sup> and WT *lacZ*<sup>-</sup> strains were washed in PBS (Phosphate Buffer Saline) and mixed 1:1 (500  
122  $\mu$ l + 500  $\mu$ l). At this point 100  $\mu$ l of the mix were serial diluted and plated on MH agar supplemented  
123 with X-gal (5-bromo-4-chloro-3-indolyl- $\beta$ -D- galactopyranoside) at 40  $\mu$ g/mL to assess T0 initial 1:1  
124 ratio. At the same time, 10  $\mu$ l from the mix were added to 2 mL of MH or MH supplemented with sub-  
125 MIC antibiotics (concentrations, unless indicated otherwise: TOB: tobramycin 0.6  $\mu$ g/ml; GEN: 0.5  
126  $\mu$ g/ml; CIP: ciprofloxacin 0.01  $\mu$ g/ml, CRB: carbenicillin 2.5  $\mu$ g/ml), PQ: paraquat 10  $\mu$ M, or H<sub>2</sub>O<sub>2</sub>: 0.5  
127 mM. Cultures were incubated with agitation at 37°C for 20 hours, and then diluted and plated on MH  
128 agar plates supplemented with X-gal. Plates were incubated overnight at 37°C and the number of blue  
129 and white CFUs was assessed. Competitive index was calculated by dividing the number of blue CFUs  
130 (*lacZ*<sup>+</sup> strain) by the number of white CFUs (*lacZ*<sup>-</sup> strain) and normalizing this ratio to the T0 initial ratio.  
131 When a plasmid was present, antibiotic was added to maintain selection: kanamycin 50  $\mu$ g/ml for  
132 pSEVA.

133

### 134 **Construction of complementation and overexpression plasmids in pSEVA238**

135 Genes were amplified on *V. cholerae* genomic DNA using primers listed in Table S4 and cloned into  
136 pSEVA238 (30) under the dependence of the *Pm* promoter(31), by restriction digestion with  
137 XbaI+EcoRI and ligation using T4 DNA ligase. Sodium benzoate 1 mM was added in the medium as  
138 inducer.

139

140 **Survival/tolerance tests** were performed on early exponential phase cultures. The overnight  
141 stationary phase cultures were diluted 1000x and grown until OD 600 nm = 0.35 to 0.4, at 37°C with  
142 shaking, in Erlenmeyers containing 25 mL fresh MH medium. Appropriate dilutions were plated on MH  
143 plates to determine the total number of CFUs in time zero untreated cultures. 5 mL of cultures were  
144 collected into 50 mL Falcon tubes and treated with lethal doses of desired antibiotics (5 or 10 times  
145 the MIC: tobramycin 5 or 10  $\mu$ g/mL, carbenicillin 50  $\mu$ g/mL, ciprofloxacin 0.025  $\mu$ g/mL) for 30 min, 1  
146 hour, 2 hours and 4 hours if needed, at 37°C with shaking in order to guarantee oxygenation.  
147 Appropriate dilutions were then plated on MH agar without antibiotics and proportion of growing CFUs  
148 were calculated by doing a ratio with total CFUs at time zero. Experiments were performed 3 to 8  
149 times.

150

151 **MIC determination**

152 Stationary phase cultures grown in MH were diluted 20 times in PBS, and 300  $\mu$ L were plated on MH  
153 plates and dried for 10 minutes. Etest straps (Biomérieux) were placed on the plates and incubated  
154 overnight at 37°C.

155  
156 **Quantification of fluorescent neomycin uptake** was performed as described(32). Neo-Cy5 is the  
157 neomycin aminoglycoside coupled to the fluorophore Cy5, and has been shown to be active against  
158 Gram- bacteria(33,34). Briefly, overnight cultures were diluted 100-fold in rich MOPS (Teknova EZ rich  
159 defined medium). When the bacterial strains reached an OD 600 nm of  $\sim$ 0.25, they were incubated  
160 with 0.4  $\mu$ M of Cy5 labeled neomycin for 15 minutes at 37°C. 10  $\mu$ L of the incubated culture were then  
161 used for flow cytometry, diluting them in 250  $\mu$ L of PBS before reading fluorescence. WT *V. cholerae*,  
162 was incubated simultaneously without neo-Cy5 as a negative control. Flow cytometry experiments  
163 were performed as described(35) and repeated at least 3 times. For each experiment, 100,000 events  
164 were counted on the Miltenyi MACSquant device.

165  
166 **PMF measurements**  
167 Quantification of PMF was performed using the Mitotracker Red CMXRos dye (Invitrogen) as  
168 described(36), in parallel with the neo-Cy5 uptake assay, using the same bacterial cultures. 50  $\mu$ L of  
169 each culture were mixed with 60  $\mu$ L of PBS. Tetrachlorosalicylanilide TCS (Thermofischer), a  
170 protonophore, was used as a negative control with a 500  $\mu$ M treatment applied for 10 minutes at room  
171 temperature. Then, 25 nM of Mitotracker Red were added to each sample and let at room temperature  
172 for 15 minutes under aluminium foil. 20  $\mu$ L of the treated culture were then used for flow cytometry,  
173 diluted in 200  $\mu$ L of PBS before reading fluorescence.

174  
175 **tRNA overexpressions**  
176 Synthetic fragments carrying the *P<sub>trc</sub>* promoter, the desired tRNA sequence and the natural  
177 transcriptional terminator sequence of VCt002 were ordered from IDT as double stranded DNA  
178 gBlocks, and cloned into pTOPO plasmid. Sequences are indicated in Table S4.

179  
180 **mRNA purification**  
181 For RNA extraction, overnight cultures were diluted 1:1000 in MH medium and grown with agitation  
182 at 37°C until an OD600 of 0.3-0.4 (exponential phase). 0.5 mL of these cultures were centrifuged and  
183 supernatant removed. Pellets were homogenized by resuspension with 1.5 mL of room temperature  
184 TRIzol Reagent. Next, 300  $\mu$ L chloroform were added to the samples following mix by vortexing.  
185 Samples were then centrifuged at 4°C for 10 minutes. Upper (aqueous) phase was transferred to a new  
186 2mL tube and mixed with 1 volume of 70% ethanol. From this point, the homogenate was loaded into  
187 a RNeasy Mini kit (Qiagen) column and RNA purification proceeded according to the manufacturer's  
188 instructions. Samples were then subjected to DNase treatment using TURBO DNA-free Kit (Ambion)  
189 according to the manufacturer's instructions.

190  
191 **mRNA quantifications by digital-RT-PCR**  
192 qRT-PCR reactions were prepared with 1  $\mu$ L of diluted RNA samples using the qScript XLT 1-Step RT-  
193 qPCR ToughMix (Quanta Biosciences, Gaithersburg, MD, USA) within Sapphire chips. Digital PCR was  
194 conducted on a Naica Geode programmed to perform the sample partitioning step into droplets,  
195 followed by the thermal cycling program suggested in the user's manual. Primer and probe sequences  
196 used in digital qRT-PCR reaction are listed in Table S4. Image acquisition was performed using the Naica  
197 Prism3 reader. Images were then analyzed using Crystal Reader software (total droplet enumeration

198 and droplet quality control) and the Crystal Miner software (extracted fluorescence values for each  
199 droplet). Values were normalized against expression of the housekeeping gene *gyrA* as previously  
200 described(37).

201

#### 202 **tRNA level quantification by qRT-PCR**

203 First-strand cDNA synthesis and quantitative real-time PCR were performed with KAPA SYBR® FAST  
204 Universal (CliniSciences) on the QuantStudio Real-Time PCR (Thermo Fischer) using the primers  
205 indicated in Table S4. Transcript levels of each gene were normalized to *gyrA* as the reference gene  
206 control(37). Gene expression levels were determined using the  $2^{-\Delta\Delta Cq}$  method (Bustin et al., 2009; Livak  
207 and Schmittgen, 2001) in respect to the MIQE guidelines. Relative fold-difference was expressed either  
208 by reference to antibiotic free culture or the WT strain in the same conditions. All experiments were  
209 performed as three independent replicates with all samples tested in duplicate. Cq values of technical  
210 replicates were averaged for each biological replicate to obtain the  $\Delta Cq$ . After exponential  
211 transformation of the  $\Delta Cq$  for the studied and the normalized condition, medians and upper/lower  
212 values were determined.

213

#### 214 **Construction of *gfp* reporters with codon stretches**

215 The positive control was *gfpmut3* (stable *gfp*)(38) under the control of *P<sub>trc</sub>* promoter, the transcription  
216 start site, *rbs* and ATG start codon are indicated in bold and underlined.

217 TTAGCAATTAATCATCCGGCTCGTATAATGTGTGG**A**ATTGTGAGCGGATAACAATTTACAC**AGGAAAC**AGCG  
218 CCGC**ATG**CGTAAAGGAGAAGAACTTTTCACTGGAGTTGTCCCAATTCTTGTTGAATTAGATGGTGTATGTTAATG  
219 GGCACAAATTTTCTGTCTCAGTGGAGAGGGTGAAGGTGATGCAACATACGGAAAACCTACCTTAAATTTATTTG  
220 CACTACTGGAAAACCTGTTCCATGGCCAACACTTGTCACTACTTTTCGGTTATGGTGTCAATGCTTTGCGAG  
221 ATACCCAGATCATATGAAACAGCATGACTTTTTCAAGAGTGCCATGCCCGAAGGTTATGTACAGGAAAGAACT  
222 ATATTTTTCAAAGATGACGGAACTACAAGACACGTGCTGAAGTCAAGTTTGAAGGTGATACCCTTGTTAATA  
223 GAATCGAGTTAAAAGGTATTGATTTTAAAGAAGATGGAAACATTCTTGACACAAATTGGAATACAACATAA  
224 CTCACACAATGTATACATCATGGCAGACAAACAAAAGAATGGAATCAAAGTTAACTTCAAATTAGACACAAC  
225 ATTGAAGATGGAAGCGTTCACTAGCAGACCATTATCAACAAAATACTCCAATTGGCGATGGCCCTGTCCTTTT  
226 ACCAGACAACCATTACCTGTCCACACAATCTGCCCTTCGAAAGATCCCAACGAAAAGAGAGACCACATGGTCC  
227 TTCTTGAGTTTGTAAACAGCTGCTGGGATTACACATGGCATGGATGAACTATACAAATAA

228 For the tested codon stretches, 6 repeats of the desired codon were added just after the ATG start  
229 codon of *gfp*. The DNA fragments were ordered as double stranded *eblocks* from Integrated DNA  
230 technologies (IDT), and cloned into pTOPO-Blunt using kanamycin resistance, following the  
231 manufacturer's instructions.

232 For tests of sequence context surrounding tyrosine codons of *rsxA*, DNA was ordered from IDT and  
233 cloned into pTOPO as described for codon stretches above, based on the following amino acid  
234 sequences (tested sequences in bold):

235 VC1017RxA *V. cholerae*

236 MLLLWQSRIMPGSEANIYITM**TEYLLL**LIGTVLVNMFVLVKFLGLCPFMGVSKKLETAIGMGLATTFVLTLASVCAYL  
237 VESYVLRPLG**EYLR**TMSFILVIAVVVQFTEMVVHKTSPT**LYRLL**GIFLPLITNCAVLGVALLNINENHNFIQSIYGF  
238 AAVGFSVLVILFASMRERIHVADVPAPFKGASIAMITAGLMSLAFMGFTGLVKL

239 RxA *E. coli*

240 M**TDYLLL**FVGTVLVNNFVLVKFLGLCPFMGVSKKLETAMGMGLATTFVMTLASICAWLIDTWILPLNLIYLRFLAFIL  
241 VIAVVVQFTEMVVRKTSPT**LYRLL**GIFLPLITNCAVLGVALLNINLGHNFQALYGFSAAVGFSLVMVLF AIRERL  
242 AVADVPAPFRGNAIALITAGLMSLAFMGFSGLVKL

243

#### 244 **Quantification of *gfp* fusion expression by fluorescent flow cytometry**

245 Flow cytometry experiments were performed as described(35) on overnight cultures and repeated at  
246 least 3 times. For each experiment, 50,000 to 100,000 events were counted on the Miltenyi  
247 MACSquant device. The mean fluorescence per cell was measured at the FITC channel for each

248 reporter in both WT and  $\Delta tgt$  strains, and the relative fluorescence was calculated as the ratio of the  
249 mean fluorescence of a given reporter in  $\Delta tgt$  over the mean fluorescence of the same reporter in the  
250 WT. Native *gfp* (*gfpmut3*) was used as control.

251 Transcriptional fusion: *rsxA* promoter sequence was amplified using primers ZIP796/ZIP812. *gfp* was  
252 amplified from pZE1-*gfp*(39) using primers ZIP813/ZIP200. The two fragments were PCR assembled  
253 into *PrsxA-gfp* using ZIP796/ZIP200 and cloned into pTOPO-TA cloning vector. The *PrsxA-gfp* fragment  
254 was then extracted using *EcoRI* and cloned into the low copy plasmid pSC101 (1 to 5 copies per cell).  
255 The plasmid was introduced into desired strains, and fluorescence was measured on indicated  
256 conditions, by counting 100,000 cells on the Miltenyi MACSquant device. Likewise, the control plasmid  
257 *Pc-gfp* (constitutive) was constructed using primers ZIP513/ZIP200 and similarly cloned in pSC101.  
258 For translational fusions, the constitutive *Ptrc* promoter, the *rsxA* gene (without stop codon) with  
259 desired codon usage fused to *gfp* (without ATG start codon) was ordered from IDT in the pUC-IDT  
260 vector (carbenicillin resistant).

261 Native sequence of *V. cholerae rsxA* gene, called *rsxA<sup>TAT</sup>gfp* in this manuscript is shown below. For  
262 *rsxA<sup>TAC</sup>gfp*, all tyrosine TAT codons were replaced with TAC.

263 ATGACCGAATATCTTTTGTGTTAATCGGCACCGTGCTGGTCAATACTTTGTTACTGGTGAAGTTTTGGGCTT  
264 ATGTCCTTTTATGGGCGTATCAAAAAAAGTAGAGACCGCCATTGGCATGGGGTTGGCGACGACATTCGTCCTC  
265 ACCTTAGCTTCGGTGTGCGCTTATCTGGTGGAAAGTTACGTGTTACGTCCGCTCGGCATTGAGTATCTGCGCA  
266 CCATGAGCTTTATTTTGGTGTGATCGCTGTCGTAGTACAGTTCACCGAAATGGTGGTGCACAAAACAGTCCGACA  
267 CTTATCGCCTGCTGGGCATTTTCTGCCACTCATCACCACCAACTGTGCGGATTAGGGGTTGCGCTGCTCAA  
268 CATCAACGAAAATCACAACCTTTATTCAATCGATCATTTATGGTTTTGGCGCTGCTGTTGGCTTCTCGCTGGTGCT  
269 CATCTTGTTGCTTCAATGCGTGAGCGAATCCATGTAGCCGATGTCCCGCTCCCTTAAGGGCGCATCCATTG  
270 CGATGATCACCGCAGTTAATGTCTTTGGCCTTTATGGGCTTTACCGGATTGGTGAAGTGGCTAGC

271 *gfp<sup>TAC</sup>* and *gfp<sup>TAT</sup>* (tyrosine 11 TAT instead of 11 TAC) were ordered from IDT as synthetic genes under  
272 the control of *Ptrc* promoter in the pUC-IDT plasmid (carbenicillin resistant). The complete sequence  
273 of ordered fragments is indicated in Table S4, tyrosine codons are underlined.

274

### 275 Construction of *bla* reporters

276 Point mutations for codon replacements were performed using primer pairs where the desired  
277 mutations were introduced and by whole plasmid PCR amplification on circular pTOPO-TA plasmid.  
278 Primers are listed Table S4.

279

### 280 Growth on microtiter plate reader for *bla* reporter assays

281 Overnight cultures were diluted 1:500 in fresh MH medium, on 96 well plates. Each well contained 200  
282  $\mu$ L. Plates were incubated with shaking on TECAN plate reader device at 37°C, OD 600 nm was  
283 measured every 15 min. Tobramycin was used at sub-MIC: TOB 0.2  $\mu$ g/mL. Kanamycin and carbenicillin  
284 were used at selective concentration: CRB 100  $\mu$ g/mL, KAN 50  $\mu$ g/mL.

285

### 286 Protein extraction

287 Overnight cultures of *V. cholerae* were diluted 1:100 in MH medium and grown with agitation at 37°C  
288 until an OD 600 nm of 0.3 (exponential phase). 50 mL of these cultures were centrifuged for 10 min at  
289 4°C and supernatant removed. Lysis was achieved by incubating cells in the presence of lysis buffer (10  
290 mM Tris-HCl pH 8, 150 mM NaCl, 1% triton 100X) supplemented with 0.1 mg/mL lysozyme and  
291 complete EDTA-free Protease Inhibitor Cocktail (Roche) for 1 hour on ice. Resuspensions were  
292 sonicated 3x50 sec (power: 6, pulser: 90%), centrifuged for 1 h at 4°C at 5000 rpm and supernatants  
293 were quantified using Pierce™ BCA Protein Assay Kit (Cat. No 23225) following the manufacturer's  
294 instructions. Proteins were then stored at -80°C.

295

## 296 **Proteomics MS and analysis**

### 297 *Sample preparation for MS*

298 Tryptic digestion was performed using eFASP (enhanced Filter-Aided Sample Preparation)  
299 protocol(40). All steps were done in 30 kDa Amicon Ultra 0.5 mL filters (Millipore). Briefly, the sample  
300 was diluted with a 8M Urea, 100 mM ammonium bicarbonate buffer to obtain a final urea  
301 concentration of 6 M. Samples were reduced for 30 min at room temperature (RT) with 5 mM TCEP.  
302 Subsequently, proteins were alkylated in 5 mM iodoacetamide for 1 hour in the darkness at RT and  
303 digested overnight at 37°C with 1 µg trypsin (Trypsin Gold Mass Spectrometry Grade, Promega).  
304 Peptides were recovered by centrifugation, concentrated to dryness and resuspended in 2%  
305 acetonitrile (ACN)/0.1% FA just prior to LC-MS injection.

### 306 *LC-MS/MS analysis*

307 Samples were analyzed on a high-resolution mass spectrometer, Q Exactive™ Plus Hybrid Quadrupole-  
308 Orbitrap™ Mass Spectrometer (Thermo Scientific), coupled with an EASY 1200 nLC system (Thermo  
309 Fisher Scientific, Bremen). One µg of peptides was injected onto a home-made 50 cm C18 column (1.9  
310 µm particles, 100 Å pore size, ReproSil-Pur Basic C18, Dr. Maisch GmbH, Ammerbuch-Entringen,  
311 Germany). Column equilibration and peptide loading were done at 900 bars in buffer A (0.1% FA).  
312 Peptides were separated with a multi-step gradient from 3 to 22 % buffer B (80% ACN, 0.1% FA) in 160  
313 min, 22 to 50 % buffer B in 70 min, 50 to 90 % buffer B in 5 min at a flow rate of 250 nL/min. Column  
314 temperature was set to 60°C. The Q Exactive™ Plus Hybrid Quadrupole-Orbitrap™ Mass Spectrometer  
315 (Thermo Scientific) was operated in data-dependent mode using a Full MS/ddMS2 Top 10 experiment.  
316 MS scans were acquired at a resolution of 70,000 and MS/MS scans (fixed first mass 100 m/z) at a  
317 resolution of 17,500. The AGC target and maximum injection time for the survey scans and the MS/MS  
318 scans were set to 3E6, 20ms and 1E6, 60ms, respectively. An automatic selection of the 10 most intense  
319 precursor ions was activated (Top 10) with a 35 s dynamic exclusion. The isolation window was set to  
320 1.6 m/z and normalized collision energy fixed to 27 for HCD fragmentation. We used an underfill ratio  
321 of 1.0 % corresponding to an intensity threshold of 1.7E5. Unassigned precursor ion charge states as  
322 well as 1, 7, 8 and >8 charged states were rejected and peptide match was disable.

### 323 *Data analysis*

324 Acquired Raw data were analyzed using MaxQuant 1.5.3.8 version(41) using the Andromeda search  
325 engine(42) against *Vibrio cholerae* Uniprot reference proteome database (3,782 entries, download  
326 date 2020-02-21) concatenated with usual known mass spectrometry contaminants and reversed  
327 sequences of all entries. All searches were performed with oxidation of methionine and protein N-  
328 terminal acetylation as variable modifications and cysteine carbamidomethylation as fixed  
329 modification. Trypsin was selected as protease allowing for up to two missed cleavages. The minimum  
330 peptide length was set to 5 amino acids. The false discovery rate (FDR) for peptide and protein  
331 identification was set to 0.01. The main search peptide tolerance was set to 4.5 ppm and to 20 ppm  
332 for the MS/MS match tolerance. One unique peptide to the protein group was required for the protein  
333 identification. A false discovery rate cut-off of 1 % was applied at the peptide and protein levels. All  
334 mass spectrometry proteomics data have been deposited at ProteomeXchange Consortium via the  
335 PRIDE partner repository with the dataset identifier PXD035297.

336 The statistical analysis of the proteomics data was performed as follows: three biological replicates  
337 were acquired per condition. To highlight significantly differentially abundant proteins between two  
338 conditions, differential analyses were conducted through the following data analysis pipeline: (1)  
339 deleting the reverse and potential contaminant proteins; (2) keeping only proteins with at least two  
340 quantified values in one of the three compared conditions to limit misidentifications and ensure a  
341 minimum of replicability; (3) log<sub>2</sub>-transformation of the remaining intensities of proteins; (4)

342 normalizing the intensities by median centering within conditions thanks to the `normalizeD` function  
343 of the R package `DAPAR`(43), (5) putting aside proteins without any value in one of both compared  
344 conditions: as they are quantitatively present in a condition and absent in another, they are considered  
345 as differentially abundant proteins and (6) performing statistical differential analysis on them by  
346 requiring a minimum fold-change of 2.5 between conditions and by using a LIMMA `t` test(44) combined  
347 with an adaptive Benjamini-Hochberg correction of the  $p$ -values thanks to the `adjust.p` function of the  
348 R package `cp4p`(45). The robust method of Pounds and Cheng was used to estimate the proportion of  
349 true null hypotheses among the set of statistical tests(46). The proteins associated with an adjusted  $p$ -  
350 value inferior to an FDR level of 1% have been considered as significantly differentially abundant  
351 proteins. Finally, the proteins of interest are therefore the proteins that emerge from this statistical  
352 analysis supplemented by those being quantitatively absent from one condition and present in  
353 another. The mass spectrometry proteomics data have been deposited to the ProteomeXchange  
354 Consortium via the PRIDE partner repository with the dataset identifier PXD035297.

355

### 356 **RNA purification for RNA-seq**

357 Cultures were diluted 1000X and grown in triplicate in MH supplemented or not with 0.6  $\mu\text{g}/\text{ml}$  of  
358 tobramycin, corresponding to 50% of the MIC in liquid cultures, to an OD 600nm of 0.4. RNA was  
359 purified with the RNAeasy mini kit (Qiagen) according to manufacturer's instructions. Briefly, 4 ml of  
360 RNA-protect (Qiagen) reagent were added on 2 ml of bacterial cultures during 5 minutes. After  
361 centrifugation, the pellets were conserved at  $-80^{\circ}\text{C}$  until extraction. Protocol 2 of the RNA protect  
362 Bacteria Reagent Handbook was performed, with the addition of a proteinase K digestion step, such  
363 as described in the protocol 4. Quality of RNA was controlled using the Bioanalyzer. Sample collection,  
364 total RNA extraction, library preparation, sequencing and analysis were performed as previously  
365 described (47). The data for this RNA-seq study has been submitted in the GenBank repository under  
366 the project number GSE214520.

### 367 **Gene Ontology (GO) enrichment analysis**

368 GO enrichment analyses were performed on <http://geneontology.org/> as follows: Binomial test was  
369 used to determine whether a group of genes in the tested list was more or less enriched than expected  
370 in a reference group. The annotation dataset used for the analysis was GO biological process complete.  
371 The analyzed lists were for each condition (MH/TOB), genes (**Table S3**) with at least 2-fold change in  
372 RNA-seq data of WT strain compared to *Δtgt*, and with an adjusted  $p$ -value  $<0,05$ . The total number of  
373 uploaded gene list to be analyzed were 53 genes for MH and 60 genes for TOB. The reference gene list  
374 was *Vibrio cholerae* (all genes in database), 3782 genes. Annotation Version: PANTHER  
375 Overrepresentation Test (Released 20220712). GO Ontology database DOI: 10.5281/zenodo.6399963  
376 Released 2022-03-22

377

### 378 **Stringent response measurement**

379 *P1rrnB-gfp* fusion was constructed using *gfp* ASV(48), and cloned into plasmid pSC101. *P1rrnB-GFP* *asv*  
380 transcriptional fusion was amplified from strain R438 (*E. coli* MG1655 *attB::P1rrnB gfp-ASV::kan*  
381 provided by Ivan Matic) using primers AFC060 and AFC055, thus including 42 bp upstream of *rrnB*  
382 transcription initiation site. PCR product was then cloned in pTOPOblunt vector and subcloned to  
383 pSC101 by *EcoRI* digestion and ligation. The final construct was confirmed by Sanger sequencing. The  
384 plasmid was then introduced by electroporation into the tested strains. Overnight cultures were  
385 performed in MH + carbenicillin 100  $\mu\text{g}/\text{mL}$  and diluted 500x in 10 mL fresh MH or MH+ TOB 0.4  $\mu\text{g}/\text{mL}$ ,  
386 in an Erlenmeyer. At time points 0 min, and every 30 during 3 hours, the OD 600 nm was measured



387 and fluorescence was quantified in flow cytometry. For each experiment, 50,000 to 100,000 events  
388 were counted on the Miltenyi MACSquant device.

389

#### 390 **tRNA enriched RNA extraction**

391 Overnight cultures of *V. cholerae* were diluted 1:1000 in MH medium and grown in aerobic conditions,  
392 with 180 rotations per minute at 37°C until an OD 600 nm of 0.5. tRNA enriched RNA extracts were  
393 prepared using room temperature TRIzol™ reagent as described(49) and contaminating DNA were  
394 eliminated using TURBO DNA-free Kit (Ambion). RNA concentration was controlled by UV absorbance  
395 using NanoDrop 2000c (Thermo Fisher Scientific). The profile of isolated tRNA fractions was assessed  
396 by capillary electrophoresis using an RNA 6000 Pico chip on Bioanalyzer 2100 (Agilent Technologies).

397

#### 398 **tRNA-enriched sample digestion for quantitative analysis of queuosine by mass spectrometry**

399 Purified tRNA enriched RNA fractions were digested to single nucleosides using the New England  
400 BioLabs Nucleoside digestion mix (Cat No. M0649S). 10µl of the RNA samples diluted in ultrapure water  
401 to 100 ng/µL were mixed with 1µL of enzyme, 2µl of Nucleoside Digestion Mix Reaction Buffer (10X) in  
402 a final volume of 20 µL in nuclease-free 1.5 mL tubes. Tubes were wrapped with parafilm to prevent  
403 evaporation and incubated at 37°C overnight.

404

#### 405 **Queuosine quantification by LC-MS/MS**

406 Analysis of global levels of queuosine (Q) was performed on a Q exactive mass spectrometer (Thermo  
407 Fisher Scientific). It was equipped with an electrospray ionization source (H-ESI II Probe) coupled with  
408 an Ultimate 3000 RS HPLC (Thermo Fisher Scientific). The Q standard was purchased from Epitoin  
409 (Singapore).

410 Digested RNA was injected onto a ThermoFisher Hypersil Gold aQ chromatography column (100 mm \*  
411 2.1 mm, 1.9 µm particle size) heated at 30°C. The flow rate was set at 0.3 mL/min and run with an  
412 isocratic eluent of 1% acetonitrile in water with 0.1% formic acid for 10 minutes.

413 Parent ions were fragmented in positive ion mode with 10% normalized collision energy in parallel-  
414 reaction monitoring (PRM) mode. MS2 resolution was 17,500 with an AGC target of 2e5, a maximum  
415 injection time of 50 ms, and an isolation window of 1.0 m/z.

416 The inclusion list contained the following masses: G (284.1) and Q (410.2). Extracted ion  
417 chromatograms of base fragments (±5ppm) were used for detection and quantification (152.0565 Da  
418 for G; 295.1028 Da for Q). The secondary base fragment 163.0608 was also used to confirm Q detection  
419 but not for quantification.

420 Calibration curves were previously generated using synthetic standards in the ranges of 0.2 to 40 pmol  
421 injected for G and 0.01 to 1 pmol for Q. Results are expressed as a percentage of total G.

422

#### 423 **Queuosine detection by sequencing**

424 The detection of queuosine was performed as described in (50). Briefly, 200 ng of total RNA were  
425 subjected to oxidation by 45 mM of NaIO<sub>4</sub> in 50 mM AcONa pH 5.2 buffer for 1h at 37°C. The reaction  
426 was quenched by addition of 36 mM glucose and incubation for 30 min at 37°C and RNA was  
427 precipitated with absolute ethanol. After precipitation and two washes by 80% ethanol, the RNA pellet  
428 was resuspended in 3' ligation reaction buffer 1x and subjected to library preparation using the  
429 NEBNext® Small RNA Library Prep Set for Illumina® (NEB, #E7330S). Specific primers for *V. cholerae*  
430 tRNAAsn\_GUU1, tRNAAsn\_GUU2, tRNAAsp\_GUC, tRNA<sup>Tyr</sup>\_GUA and tRNAHis\_GUG were hybridized  
431 instead of RT primer used in NEBNext® Small RNA Library Prep kit, under the same hybridization  
432 conditions. The 5'-SR adaptor was ligated, and reverse transcription was performed for 1h at 50°C  
433 followed by 10 min at 80°C using Superscript IV RT (instead of Protoscript II used in the kit). PCR

434 amplification was performed as described in the manufacturer's protocol. Libraries were qualified  
435 using TapeStation 4150 and quantified using Qubit fluorometer. Libraries were multiplexed and  
436 sequenced in a 50 bp single read mode using NextSeq2000 (Illumina, San Diego).

437 Bioinformatic analysis was performed by trimming of raw reads using trimmomatic v0.39 to remove  
438 adapter sequences as well as very short and low-quality sequencing reads. Alignment was done by  
439 bowtie2 (v2.4.4) in End-to-End mode with *--mp 2 --rdg 0,2* options to favor retention of reads with  
440 deletions, only non-ambiguously mapped reads were taken for further analysis. Coverage file was  
441 created with *samtools mpileup* and deletion signature extracted for every position using custom R  
442 script. Deletion score was calculated as number of deletions divided by number of matching  
443 nucleotides at a given position. Analysis of Q tRNA modification in *V. cholerae* strains was performed  
444 in triplicate for biological replicates with technical duplicate for each sample.

445

#### 446 **Analysis of Queuosine tRNA Modification Using APB Northern Blot Assay**

447 Quantification of queuosine in tRNA-Tyr from purified tRNA-enriched RNA fractions was performed  
448 using a non-radioactive Northern blot method: the procedure for pouring and running N-acryloyl-3-  
449 aminophenylboronic acid (APB) gels was based on the method detailed in (51). tRNA-Tyr were  
450 detected using the following 3'-end digoxigenin (DIG)-labeled probe: 5' -  
451 CTTTGGCCACTCGGGAACCCCTCC - 3'DIG.

452 For 1 gel, ABP gel buffer was prepared by mixing 4.2g urea, 50mg 3-(Acrylamido) phenylboronic acid  
453 (Sigma Aldrich Cat No. 771465), 1ml 10X RNase-free TAE, 3.2ml 30% acrylamide and bis-acrylamide  
454 solution 37.5:1 and adding water to adjust the final volume to 10ml. After stirring to facilitate  
455 dissolution and right before pouring, 10µl TEMED and 60 µL 10% APS were added to the 10ml ABP  
456 buffer to catalyze and initiate polymerization respectively. Gels were casted using the Mini-PROTEAN®  
457 Bio-Rad handcast system, short plates (70x100 mm), 0.75 mm spacers and 10-well gel combs. Gels  
458 were left to polymerize at room temperature for 50 minutes.

459 Alkaline hydrolysis in 100mM of Tris-HCl pH 9 of our tRNA-enriched RNA extracts was carried out at  
460 37°C for 30 min to break the ester bonds between tRNAs and their cognate amino acids. 10µl of the  
461 deacylated tRNA-enriched RNA samples were mixed with 8 µl of 2X RNA loading dye (Thermo  
462 Scientific™ Cat No. R0641), denatured for 3 min at 72°C and the whole volume was loaded onto the  
463 gel. Electrophoresis of the gels were carried out in the Mini-PROTEAN® Tetra Vertical Electrophoresis  
464 Cell for 30 min at 85V at room temperature followed by 1h30 at 140 V at 4°C. Gels were incubated at  
465 room temperature for 15 min with shaking in 50 ml 1X RNase-free TAE mixed with 10 µl of 10000X  
466 SYBR Gold nucleic acid staining solution (Invitrogen™ S11494) and nucleic acids were visualized using  
467 a transilluminator. Transfers of the nucleic acids to positively charged nylon membranes were  
468 performed at 5 V/gel for 40 min at room temperature using a semi dry blotting system. RNAs were  
469 crosslinked to the membrane surface through exposure to 254 nm UV light at a dose of 1.2 Joules.

470 Membranes were transferred into glass bottles containing 5ml of pre-warmed hybridization buffer and  
471 incubated for 1 hour at 42°C at a constant rotation in a hybridization oven. Hybridization buffer was  
472 obtained by mixing 12.3 ml of 20X SSX, 1ml of 1M Na<sub>2</sub>HPO<sub>4</sub> pH7.2, 17.5ml of 20% SDS, 2ml of 50X  
473 Denhardt's solution and 17ml RNase-free H<sub>2</sub>O. 3µl of the DIG-labeled probe solution at 100 pmol/µl  
474 were then added into the 5ml hybridization buffer and the bottles were rotated in the hybridization  
475 oven at 42°C overnight. Membranes were washed 2 time with 2X SSC/5% SDS for 15 min at 42°C and  
476 1 time with 1X SSC/1% SDS for 15min at 42°C.

477 Nucleic acids wash and immunological detection of the DIG-labeled probes were performed using the  
478 DIG Wash and Block Buffer Set (Roche, Cat No. 11585762001) according to the manufacturer's  
479 protocols. Membranes were placed in a plastic container filled with 15ml of the blocking solution for  
480 nonspecific binding sites blocking. After 30min incubation at room temperature with rotation, 3µl of

481 the alkaline phosphatase-coupled anti-DIG antibody (Fab fragments, Roche, Cat No. 11093274910)  
482 were added to the buffer and incubation at room temperature on a belly-dancer was allowed for 30  
483 more min. Next, membranes were washed 3 times 15 min with DIG-wash buffer and once with DIG-  
484 detection buffer for 5min. For chemiluminescence visualization of the probe, 1ml of CDP-Star®  
485 Chemiluminescent Substrate (Disodium 2-chloro-5-(4-methoxyspiro[1,2-dioxetane-3,2'-(5-  
486 chlorotricyclo[3.3.1.1.3.7]decan])-(4-yl)-1-phenyl phosphate) (Roche, Cat No. 11685627001) was added  
487 to 9ml of DIG-detection buffer and membranes were then incubated with the substrate for 5 min. The  
488 chemiluminescent signal was detected with the iBright Imaging Systems.

489

#### 490 **Ribosome profiling (Ribo-seq)**

491 Pellet from 200 ml of *Vibrio cholerae* at 0.25 OD<sub>600nm</sub> WT or mutant *Δtgt* in triplicates, with or without  
492 tobramycin were flash frozen in liquid nitrogen and stored at -80°C. The polysomes were extracted  
493 with 200 μl of extraction buffer (20 mM Tris pH8-150 mM Mg(CH<sub>3</sub>COO)<sub>2</sub>-100 mM NH<sub>4</sub>Cl, 5 mM CaCl<sub>2</sub>-  
494 0,4% Triton X100-1% Nonidet P40) added of 2x cocktail anti proteases Roche and 60U RNase Inhibitor  
495 Murine to the buffer, DNase I and glass beads (diameter <106 micrometers), vortexed during 30 min  
496 at 4°C. The supernatant of this crude extract was centrifugated 10 min at 21 krpf at +4°C. The  
497 absorbance was measured at 260nm on 1 μl from 1/10 extract. After 1 hour of digestion at 25°C with  
498 0.75 U MNase/0.025 UA<sub>260nm</sub> of crude extract, the reaction was stopped by the addition of 3 μl 0.5 M  
499 EGTA pH8. The monosomes generated by digestion were purified through a 24% sucrose cushion  
500 centrifuged 90 min at 110 krpm on a TLA110 rotor at +4°C. The monosomes pellet was rinsed with 200  
501 μl of resuspension buffer (20 mM Tris-HCl pH 7,4 - 100 mM NH<sub>4</sub>Cl - 15 mM Mg(CH<sub>3</sub>COO)<sub>2</sub> - 5 mM CaCl<sub>2</sub>  
502 ) and then recovered with 100 μl. RNA were extracted by acid phenol at 65°C, CHCl<sub>3</sub> and precipitated  
503 by Ethanol with 0.3M CH<sub>3</sub>COONa pH 5.2. Resuspended RNA was loaded on 17% polyacrylamide (19 :1);  
504 7 M urea in 1x TAE buffer at 100 V during 6 hours and stained with SYBRgold. RNA fragments  
505 corresponding to 28-34 nt were retrieved from gel and precipitated in ethanol with 0.3 M CH<sub>3</sub>COONa  
506 pH 5.2 in presence of 100 μg glycogen. rRNA were depleted using MicroExpress Bacterial mRNA  
507 Enrichment kit from Invitrogen. The supernatant containing the ribosome footprints were recovered  
508 and RNA were precipitated in ethanol in presence of glycogen overnight at -20°C. The RNA  
509 concentration was measured by Quant-iT microRNA assay kit (Invitrogen). The RNA was  
510 dephosphorylated in 3' and then phosphorylated in 5' to generate cDNA libraries using the NebNext  
511 Small RNA Sample Prep kit with 3' sRNA Adapter (Illumina) according to the manufacturer's protocol  
512 with 12 cycles of PCR amplification in the last step followed by DNA purification with Monarch PCR  
513 DNA cleanup kit (NEB). Library molarity was measured with the Qubit DNAds HS assay kit from  
514 Invitrogen and the quality was analyzed using Bioanalyzer DNA Analysis kit (Agilent) and an equimolar  
515 pool of the 12 libraries was sequenced by the High-throughput sequencing facility of I2BC with NextSeq  
516 500/550 High output kit V2 (75 cycles) (Illumina) with 10 % PhiX.  
517 Sequencing data is available at GSE231087.

518

#### 519 **Analysis of ribosome profiling data**

520 RiboSeq analysis was performed using the RiboDoc package (52) for statistical analysis of differential  
521 gene expression (DEseq2). Sequencing reads are first trimmed to remove adaptors then aligned to the  
522 two *V. cholerae* chromosomes (NC\_002505 and NC\_002506). Reads aligned uniquely are used to  
523 perform the differential gene expression analysis. MNase shows significant sequence specificity at A  
524 and T (53). Due to this specificity and A-T biases in *V. cholerae* genome, ribosome profiling data exhibit  
525 a high level of noise that prevents the obtention of a resolution at the nucleotide level.

526

#### 527 **UV sensitivity measurements**

528 Overnight cultures were diluted 1:100 in MH medium and grown with agitation at 37°C until an OD  
529 600 nm of 0.5-0.7. Appropriate dilutions were then plated on MH agar. The proportion of growing CFUs

530 after irradiation at 60 Joules over total population before irradiation was calculated, doing a ratio with  
531 total CFUs. Experiments were performed 3 to 8 times.

532

### 533 **Quantification and statistical analysis**

534 For comparisons between 2 groups, first an F-test was performed in order to determine whether  
535 variances are equal or different between comparisons. For comparisons with equal variance, Student's  
536 t-test was used. For comparisons with significantly different variances, we used Welch's t-test. For  
537 multiple comparisons, we used ANOVA. We used GraphPad Prism to determine the statistical  
538 differences (*p*-value) between groups. \*\*\*\* means  $p < 0.0001$ , \*\*\* means  $p < 0.001$ , \*\* means  $p < 0.01$ , \*  
539 means  $p < 0.05$ . For survival tests, data were first log transformed in order to achieve normal  
540 distribution, and statistical tests were performed on these log-transformed data. The number of  
541 replicates for each experiment was  $3 < n < 6$ . Means and geometric means for logarithmic values were  
542 also calculated using GraphPad Prism.

543

### 544 **Bioinformatic analysis for whole genome codon bias determinations**

545 *Data*. Genomic data (fasta files containing CDS sequences and their translation, and GFF annotations)  
546 for *Vibrio cholerae* (assembly ASM674v1) were downloaded from the NCBI FTP site  
547 (<ftp://ftp.ncbi.nlm.nih.gov>).

548 *Codon counting*. For each gene, the codons were counted in the CDS sequence, assuming it to be in-  
549 frame. This step was performed using Python 3.8.3, with the help of the Mappy 2.20 (54) and Pandas  
550 1.2.4 (55,56) libraries.

551 *Gene filtering*. Genes whose CDS did not start with a valid start codon were excluded from further  
552 computations. A valid start codon is one among ATA, ATC, ATG, ATT, CTG, GTG, TTG, according to the  
553 genetic code for bacteria, archaea and plastids (translation table 11 provided by the NCBI at  
554 <ftp://ftp.ncbi.nlm.nih.gov/entrez/misc/data/gc.prt>). Further computations were performed on 3590  
555 genes that had a valid start codon.

556 *Codon usage bias computation*. The global codon counts were computed for each codon by summing  
557 over the above selected genes. For each gene as well as for the global total, the codons were grouped  
558 by encoded amino acid. Within each group, the proportion of each codon was computed by dividing  
559 its count by the sum of the counts of the codons in the group. The codon usage bias for a given codon  
560 and a given gene was then computed by subtracting the corresponding proportion obtained from the  
561 global counts from the proportion obtained for this gene. Codon usage biases were then standardized  
562 by dividing each of the above difference by the standard deviation of these differences across all genes,  
563 resulting in standardized codon usage biases "by amino acid" ("SCUB by aa" in short). All these  
564 computations were performed using the already mentioned Pandas 1.2.4 Python library.

565 *Associating genes to their preferred codon*. For each codon group, genes were associated to the codon  
566 for which they had the highest "SCUB by aa" value. This defined a series of gene clusters denoted using  
567 the "aa\_codon" pattern. For instance, "\*\_TAT" contains the genes for which TAT is the codon with the  
568 highest standardized usage bias among tyrosine codons.

569 *Extracting most positively biased genes from each cluster*. Within each cluster, the distribution of  
570 "SCUB by aa" values for each codon was represented using violin plots. Visual inspections of these  
571 violin plots revealed that in most cases, the distribution was multi-modal. An automated method was  
572 devised to further extract from a given cluster the genes corresponding to the sub-group with the  
573 highest "SCUB by aa" for each codon. This was done by estimating a density distribution for "SCUB by  
574 aa" values using a Gaussian Kernel Density Estimate and finding a minimum in this distribution. The  
575 location of this minimum was used as a threshold above which genes were considered to belong to  
576 the most positively biased genes. This was done using the SciPy 1.7.0 (57) Python library. Violin plots  
577 were generated using the Matplotlib 3.4.2 (58) and Seaborn 0.11.1 (59) Python libraries.

578 *Code availability*. All codes to perform these analyses were implemented in the form of Python scripts,  
579 Jupyter notebooks (60) and Snakemake(61) workflows, and are available in the following git repository:  
580 <https://gitlab.pasteur.fr/bli/17009> only. Data are available for whole genome codon usage of *V.*

581 *cholerae* in excel sheet and *V. cholerae* codon usage biased gene lists at zenodo public repository with  
582 the following doi: 10.5281/zenodo.6875293.

583

584

## 585 Results

586

### 587 Tobramycin tolerance is decreased in $\Delta tgt$ without any difference in uptake

588 We confirmed *V. cholerae*  $\Delta tgt$  strain's growth defect in sub-MIC tobramycin (TOB) (**Fig. 1A**) and  
589 that expression of *tgt* in trans restores growth in these conditions (**Fig. 1B**). We further tested tolerance  
590 to lethal antibiotic concentrations by measuring survival after antibiotic treatment during 15 minutes  
591 to 4 hours. As expected,  $\Delta tgt$  is less tolerant than WT to TOB (**Fig. 1CD**), but had no impact in  
592 ciprofloxacin (CIP) or carbenicillin (CRB) (**Fig. 1EF**). In specific cases, the levels of a given tRNA  
593 modification can depend on the presence of other ones(62). One example is the m<sup>5</sup>C38 modification  
594 of tRNA<sup>Asp</sup> which is favored by the presence of Q in eukaryotes(22,63). However, bacterial tRNAs do  
595 not harbor m<sup>5</sup>C and neither do they harbor mal-Q or gal-Q hypermodifications, unlike in eukaryotes  
596 (64). In *E. coli*, tRNA<sup>Tyr</sup> is modified by RluF which introduces a pseudouridine ( $\Psi$ ) at position 35 of the  
597 anticodon, next to the G/Q at position 34 (65). We tested whether the presence or absence of this  
598 second modification has an impact on Q-dependent fitness phenotypes. Competition experiments  
599 showed no effect of the *rluF* deletion in any condition (**Sup. Fig. S1**), showing that the effect of *tgt* is  
600 not linked to an effect of a  $\Psi$  modification possibly made by RluF in *V. cholerae*.

601 We asked whether the growth defect of  $\Delta tgt$  is due to increased aminoglycoside entry and/or a  
602 change in proton-motive force (PMF) (32,66). We used a  $\Delta toIA$  strain as a positive control for disruption  
603 of outer membrane integrity and aminoglycoside uptake(67). No changes either in PMF (**Fig. 1G**), nor  
604 in uptake of the fluorescent aminoglycoside molecule neo-Cy5 (**Fig. 1H**)(33) were detected in the  $\Delta tgt$   
605 strain, indicating that the increased susceptibility of  $\Delta tgt$  to TOB is not due to increased aminoglycoside  
606 entry into the *V. cholerae* cell.

607

### 608 Overexpression of the canonical tRNA<sup>Tyr</sup><sub>GUA</sub> rescues growth of $\Delta tgt$ in TOB

609 We next investigated whether all four tRNAs with GUN anticodon modified to QUN by Tgt, are  
610 equally important for the TOB sensitivity phenotype of the  $\Delta tgt$  mutant: Aspartate (Asp)/Asparagine  
611 (Asn)/Tyrosine (Tyr)/Histidine (His). The absence of Q could have direct effects at the level of codon  
612 decoding but also indirect effects such as influencing tRNAs' degradation(68). qRT-PCR analysis of  
613 tRNA<sup>Tyr</sup> levels showed no major differences between WT and  $\Delta tgt$  strains, making it unlikely that the  
614 effect of Q modification on codon decoding is caused by altered synthesis or degradation of tRNA<sup>Tyr</sup>  
615 (**Sup. Fig. S2A**). The levels of the other three tRNAs modified by Tgt also remained unchanged (**Sup.**  
616 **Fig. S2A**). These results do not however exclude a more subtle or heterogeneous effect of Q  
617 modification on tRNA levels, which would be below the detection limits of the technique in a bacterial  
618 whole population.

619 We next adopted a tRNA overexpression strategy from a high copy plasmid. The following tRNAs-  
620<sub>GUN</sub> are the canonical tRNAs which are present in the genome: Tyr<sub>GUA</sub> (codon TAC), His<sub>GUG</sub> (codon CAC),  
621 two isoforms of Asn<sub>GUU</sub> (codon AAC), Asp<sub>GUC</sub> (codon GAT). The following tRNAs-<sub>AUN</sub> are synthetic tRNAs  
622 which are not present in the genome: Tyr<sub>AUA</sub>, His<sub>AUG</sub>, Asn<sub>AUU</sub>, Asp<sub>AUC</sub>. tRNA<sup>Phe</sup><sub>GAA</sub> was also used as non  
623 Tgt-modified control. Overexpression of tRNA<sup>Tyr</sup><sub>GUA</sub>, but not tRNA<sup>Tyr</sup><sub>AUA</sub> rescues the  $\Delta tgt$  mutant's  
624 growth defect in sub-MIC TOB (**Fig. 1I**). Overexpression of tRNA<sup>His</sup><sub>AUG</sub> also seemed to confer a benefit  
625 compared to empty plasmid (p0), but not as strong as tRNA<sup>Tyr</sup><sub>GUA</sub> (**Sup. Fig. S2B**). We do not observe  
626 any major rescue of TOB sensitive phenotypes when the other tRNAs are overexpressed, suggesting  
627 that changes in Tyr codon decoding is mostly responsible for the  $\Delta tgt$  mutant's TOB-susceptibility  
628 phenotype.

629

### 630 Q modification influences amino acid incorporation at tyrosine codons

631 We decided to measure the efficiency of amino acid incorporation at corresponding codons in  $\Delta tgt$ ,  
632 using *gfp* reporters. First, we confirmed that GFP fluorescence from native GFP (encoded by *gfpmut3*)

633 is not affected in  $\Delta tgt$  compared to WT (*gfp+* in **Fig. 2**), indicating that there are no major differences  
634 on expression or folding of the GFP in  $\Delta tgt$ . We next constructed *gfp* fluorescent reporters by  
635 introducing within their coding sequence, stretches of repeated identical codons, for Asp/Asn/Tyr/His.  
636 This set of reporters revealed that the absence of Q leads to an increase of amino acid incorporation  
637 at Tyr TAT codons, both without and with sub-MIC TOB (**Fig. 2A** NT and TOB). This was not the case for  
638 Asp (Fig. 2B), nor for Asn (Fig. 2D), and we observed a slighter and more variable change for His (Fig.  
639 2C). No significant effect of *tgt* was observed for 2<sup>nd</sup> near-cognate codons obtained by changing 1 base  
640 of the triplet for TAC and TAT codons (Fig. 2E): Phe TTC/TTT, Cys TGT/TGC, Ser TCT/TCC (the 3<sup>rd</sup> near-  
641 cognate stop codons TAA and TAG were not tested in this setup). Thus, Q modification strongly impacts  
642 the decoding of Tyr codons, and to a lesser extent His codons in this reporter system.

643

#### 644 **The absence of Q decreases misincorporation at Tyr TAT**

645 GFP reporters tested above with codon stretches were pivotal for the identification of codons for  
646 which decoding efficiency differs between WT and  $\Delta tgt$ , even though it's not a natural setup. We next  
647 developed a biologically relevant  $\beta$ -lactamase reporter tool to assess differences in the decoding of  
648 the tyrosine codons in WT and  $\Delta tgt$  strains. The amino acid Tyr103 of the  $\beta$ -lactamase, was previously  
649 shown to be important for its function in resistance to  $\beta$ -lactam antibiotics, such as carbenicillin (69-  
650 71). We replaced the native Tyr103 TAC with the synonymous codon Tyr103 TAT (**Fig. 3**). While in the  
651 WT, both versions of  $\beta$ -lactamase conferred similar growth in carbenicillin with or without sub-MIC  
652 TOB (Fig. 3AB), in the  $\Delta tgt$  strain the Tyr-TAT version grows better than the Tyr-TAC version upon  
653 exposure to TOB stress (Fig. 3CD). This suggests a more efficient translation of the Tyr103-TAT  $\beta$ -  
654 lactamase mRNA, compared to the native Tyr103-TAC version, in stressed  $\Delta tgt$  strain.

655 Presence or absence of a modification could also affect aminoacylation of the tRNA. Both TAT and  
656 TAC codons are decoded by the same and only one tRNA, tRNA<sup>Tyr</sup><sub>GUA</sub>. In this case, a defect in  
657 aminoacylation of this tRNA would impact the decoding of both codons. Our results do not support  
658 such an aminoacylation problem, because the efficiency of decoding of TAT but not TAC increases in  
659  $\Delta tgt$ , and the difference is clearer in TOB. These results are also consistent with rescue of TOB-sensitive  
660 phenotype by tRNA<sup>Tyr</sup><sub>GUA</sub> but not tRNA<sup>Tyr</sup><sub>AUA</sub> overexpression in  $\Delta tgt$ .

661 Altogether, results suggest that in the presence of sub-MIC TOB stress, the absence of Q  
662 namely leads to better translation of the TAT vs TAC codon, leading to differential translation of  
663 proteins with codon usage biases towards TAC or TAT codons.

#### 664 **Proteomics study identifies RsxA among factors for which translation is most impacted in $\Delta tgt$**

665 These observations show a link between Q modification of tRNA, differential decoding of Tyr  
666 codons (among others) and susceptibility to aminoglycosides. We hypothesized that proteins that are  
667 differentially translated according to their Tyr codon usage could be involved in the decreased  
668 efficiency of the response to aminoglycoside stress in  $\Delta tgt$ . We conducted a proteomics study  
669 comparing WT vs  $\Delta tgt$ , in the absence and presence of sub-MIC TOB (proteomics **Table S1** and **Fig. 4**).  
670 Loss of Q results in generally decreased detection of many proteins in TOB (shift towards the left in the  
671 volcano plot **Fig. 4AB**), and in increases in the levels of 96 proteins. Among those, RsxA (encoded by  
672 VC1017) is 13-fold more abundant in the  $\Delta tgt$  strain compared to WT in TOB. RsxA is part of an anti-  
673 SoxR complex. SoxR is an oxidative stress response regulator(29) that controls *sodA* (VC2694,  
674 superoxide dismutase) and *acrA* (VC0913, efflux), among other genes of the regulon. The Rsx complex  
675 reduces and inactivates SoxR, preventing the induction of the regulon. Consistently, we find that the  
676 levels of SodA and AcrA proteins are decreased in  $\Delta tgt$  compared to WT in TOB (indicated in **Fig. 4B**).  
677 With 83% of Tyr-TAT codons, instead of the expected 53% average, RsxA has a clear codon usage bias.  
678 To test whether some of the differentially abundant protein groups in the Q deficient mutant show  
679 similar biases, the Tyr codon usage was calculated for the 96 more abundant and 195 less abundant  
680 proteins expressed in TOB. More abundant proteins in  $\Delta tgt$  TOB with a codon usage bias towards TAT  
681 vs TAC are represented as light blue dots in **Fig. 4AB**. No statistically significant difference was detected  
682 for TAT codon usage in neither sets of proteins. Thus, one cannot draw conclusions or infer predictions

683 about codon decoding efficiencies in a tRNA modification mutant such as *Δtgt* from the proteomics  
684 data alone.

685 We thus performed Ribo-seq (ribosome profiling) analysis on extracts from WT and *Δtgt* strains  
686 grown in presence of sub-MIC TOB. Unlike for eukaryotes, technical limitations (e.g. the RNase which  
687 is used displays significant sequence specificity), do not allow to obtain codon resolution in bacteria  
688 (72). However, we determined 159 transcripts with increased and 197 with decreased translation in  
689 *Δtgt* and we plotted their standardized codon usage bias for codons of interest (Fig. 4DEFG). The  
690 calculation of this value is explained in details in the materials and methods section, and shown for  
691 *rsxA* as example in **Fig 4C**. Briefly, we took as reference the mean proportion of the codons of interest  
692 in the genome (e.g. for tyrosine: TAT= 0.53 and TAC= 0.47, meaning that for a random *V. cholerae*  
693 gene, 53% of tyrosine codons are TAT). For each gene, we calculated the proportion of each codon  
694 (e.g. for *rsxA*: TAT=0.83 and TAC=0.17). We next calculated the codon usage bias as the difference  
695 between a given gene's codon usage and the mean codon usage (e.g. for *rsxA*, the codon usage bias  
696 for TAT is 0.83-0.53=+0.30). Finally, in order to consider the codon distribution on the genome and  
697 obtain statistically significant values, we calculated standardized bias by dividing the codon usage bias  
698 by standard deviation for each codon (e.g. for *rsxA*, 0.30/0.25 = +1.20). This is done to adjust standard  
699 deviation to 1, and thus to get comparable (standardized) values, for each codon.

700 Ribo-seq data (**Table S2**) shows that TAT (and GAT) codon usage was decreased in the list of  
701 transcripts with decreased translation in *Δtgt*, while it was increased in the list of transcripts with  
702 increased translation (**Fig. 4DE**). No difference was detected for AAT and CAT (**Fig. 4FG**). Data is thus  
703 consistent with more efficient translation of TAT codons in *Δtgt*.

704 In addition to mistranslation and codon decoding efficiency, other factors also influence  
705 detected protein levels, such as transcription, degradation, etc. Moreover, the localization and  
706 sequence context of the codons for which the efficiency of translation is impacted, may be important.  
707 Nevertheless, as translation of proteins with a codon usage bias towards TAC or TAT may be impacted  
708 in *Δtgt*, and as the most abundant protein RxA in *Δtgt* in TOB shows a strong TAT bias, we decided to  
709 evaluate whether RxA is post-transcriptionally regulated by the Q modification and whether it may  
710 affect fitness in the presence of TOB.

711  
712 **RxA is post-transcriptionally upregulated in *Δtgt* due to more efficient decoding of tyrosine TAT  
713 codons in the absence of Q modification**

714 Transcriptomic analysis comparing at least 2-fold differentially expressed genes between *V.*  
715 *cholerae* *Δtgt* and WT strains (**Table S3**) showed that, respectively, 53 and 26 genes were significantly  
716 downregulated in MH and sub-MIC TOB, and 34 were up in sub-MIC TOB. Gene ontology (GO)  
717 enrichment analysis showed that the most impacted GO categories were bacteriocin transport and  
718 iron import into the cell (45- and 40-fold enriched) in MH, and proteolysis and response to heat (38-  
719 and 15-fold enriched) in TOB. In both conditions, the levels of *rsxA* transcript remained unchanged.

720 RxA carries 6 tyrosine codons among which the first 5 are TAT and the last one is TAC. RxA is  
721 13-fold more abundant in *Δtgt* than WT, but transcript levels measured by digital RT-PCR are  
722 comparable in both strains (**Fig. 5A**), consistent with RNA-seq data. We constructed transcriptional and  
723 translational *gfp* fusions in order to evaluate the expression of *rsxA* in WT and *Δtgt* strains. As expected  
724 from digital RT-PCR results, no significant differences in fluorescence were observed for the  
725 transcriptional fusion of the *rsxA* promoter with *gfp* (**Fig. 5B**), excluding transcriptional regulation of  
726 *rsxA* in this context. For translational fusions, we used either the native *rsxA* sequence bearing 5 TAT +  
727 1 TAC codons, or a mutant *rsxA* allele carrying all 6 TAC codons (hereafter called respectively RxA<sup>TAT</sup>  
728 and RxA<sup>TAC</sup>). Confirming the proteomics results, the RxA<sup>TAT</sup>-GFP fusion was more fluorescent in the  
729 *Δtgt* mutant, but not the RxA<sup>TAC</sup>-GFP one (**Fig. 5C** and detailed flow cytometry data in **Sup. Fig. S3ABC**).  
730 Since increased *rsxA* expression appeared to be somewhat toxic for growth, and in order to test  
731 translation on a reporter which confers no growth defect, we chose to test directly the translation of  
732 *gfp*, which originally carries 4 TAT (36%) and 7 TAC (64%) codons in its native sequence. We constructed  
733 two synonymous versions of the GFP protein, with all 11 tyrosine codons either changed to TAT or to  
734 TAC. Similar to what we observed with *rsxA*, the GFP<sup>TAT</sup> version, but not the GFP<sup>TAC</sup> one, generated

735 more fluorescence in the  $\Delta tgt$  background, (**Fig. 5C** and detailed flow cytometry data in **Sup. Fig.**  
736 **S3DEF**).

737 Since not all TAT biased proteins are found to be enriched in  $\Delta tgt$  proteomics data, the  
738 sequence context surrounding TAT codons could affect their decoding. Overall, our results  
739 demonstrate that RxsA is upregulated in the  $\Delta tgt$  strain at the translational level, and that proteins  
740 with a codon usage bias towards tyrosine TAT are prone to be more efficiently translated in the  
741 absence of Q modification, but this is also dependent on the sequence context.

742

#### 743 **Increased expression of RxsA hampers growth in sub-MIC TOB**

744 We asked whether high levels of RxsA could be responsible of  $\Delta tgt$  strain's increased sensitivity  
745 to TOB. *rsxA* cannot be deleted since it is essential in *V. cholerae* (see our TN-seq data (1,73)). We  
746 overexpressed *rsxA* from an inducible plasmid in WT strain (**Fig. 5D** and **Sup. Fig. S4ABCD**). In the  
747 presence of sub-MIC TOB, overexpression of *rsxA* in the WT strain strongly reduces growth (**Sup. Fig.**  
748 **S4B, black curve compared to blue**), while overexpression of *tgt* restores growth of the  $\Delta tgt$  strain  
749 (**Sup. Fig. S4D, green curve**). This shows that increased *rsxA* levels can be toxic during growth in sub-  
750 MIC TOB and is consistent with decreased growth of the  $\Delta tgt$  strain.

751 Unlike for *V. cholerae*, *rsxA* is not an essential gene in *E. coli*, and does not bear a TAT bias. It  
752 has however the same function. In order to confirm that the presence of RxsA can be toxic during  
753 growth in sub-MIC TOB, we additionally performed competition experiments in *E. coli* with simple and  
754 double mutants of *tgt* and *rsxA*. Since  $\Delta tgt$  strain's growth is more affected than WT at TOB 0.5  $\mu\text{g/ml}$   
755 (indicated with an arrow in **Sup. Fig. S4E**), we chose this concentration for competition and growth  
756 experiments. The results confirm that inactivation of *rsxA* in  $\Delta tgt$  restores fitness in sub-MIC TOB (**Sup.**  
757 **Fig. S4F**), and that overproduction of RxsA decreases growth in TOB.

758

#### 759 ***tgt* transcription is repressed by CRP and induced by tobramycin in *V. cholerae***

760 *tgt* was previously observed to be upregulated in *E. coli* isolates from urinary tract infection(74)  
761 and in *V. cholerae* after mitomycin C treatment (through indirect SOS induction(47)). We measured *tgt*  
762 transcript levels using digital RT-PCR in various transcriptional regulator deficient mutants (iron uptake  
763 repressor Fur, general stress response and stationary phase sigma factor RpoS and carbon catabolite  
764 control regulator CRP), as well as upon exposure to antibiotics, particularly because *tgt* is required for  
765 growth in sub-MIC TOB. We also tested the iron chelator dipyrindyl (DP), the oxidant agent paraquat  
766 (PQ) and serine hydroxamate (SHX) which induces the stringent response.

767 Among all tested conditions, we found that sub-MIC TOB and the stringent response increase *tgt*  
768 transcript levels, while the carbon catabolite regulator CRP appears to repress it (**Fig. 6A**). We found a  
769 sequence between ATG -129 to -114: TTCGC<sup>AGGGAA</sup>ACGCG which shows some similarity (in blue) to the  
770 *V. cholerae* CRP binding consensus (T/A)<sub>1</sub>(G/T)<sub>2</sub>(T/C)<sub>3</sub>G<sub>4</sub>(A/C)<sub>5</sub><sup>NNNNNN</sup>(T/G)<sub>12</sub>C<sub>13</sub>(A/G)<sub>14</sub>(C/A)<sub>15</sub>(T/A)<sub>16</sub>.  
771 However, CRP binding was not previously detected by ChIP-seq in the promoter region of *tgt* in *V.*  
772 *cholerae*(75). CRP binding could be transitory or the repression of *tgt* expression by CRP could be an  
773 indirect effect.

774 Regarding induction by sub-MIC TOB, the mechanism remains to be determined. We  
775 previously showed that sub-MIC TOB induces the stringent response(1,76). Since induction of *tgt*  
776 expression by SHX and by TOB seems to be in the same order of magnitude, we hypothesized that sub-  
777 MIC TOB could induce *tgt* through the activation of the stringent response. Using a *P1rrnB-gfp* fusion  
778 (1), which is down-regulated upon stringent response induction(77) (**Fig. 6B**), we found that the  
779 stringent response is significantly induced by sub-MIC TOB, both in WT and  $\Delta tgt$ . This indicates that  
780 sub-MIC TOB possibly induces *tgt* expression through the stringent response activation.

781

#### 782 **Q modification levels can be dynamic and are directly influenced by *tgt* transcription levels**

783 We have identified conditions regulating *tgt* expression. We next addressed whether up/down-  
784 regulation of *tgt* affects the actual Q modification levels of tRNA. We measured Q levels by mass  
785 spectrometry in WT and the  $\Delta crp$  strain, where the strongest impact on *tgt* expression was observed



786 **(Fig. 6C)**. We find a significant 1.6-fold increase in Q levels in  $\Delta crp$ . We also tested the effect of sub-  
787 MIC TOB, but smaller differences are probably not detected using our approach of mass spectrometry  
788 in bulk cultures.

789 In order to get deeper insight into modification level of *V. cholerae* tRNAs potentially having Q34  
790 modification, we decided to adapt a recently published protocol for the detection and quantification  
791 of queuosine by deep sequencing (50). This allowed us to validate the presence of Q34 modification in  
792 the *V. cholerae* tRNAs Asp, His and Asn\_GTT2 and precisely measure its level and modulation under  
793 different growth conditions **(Fig. S5)**. We also showed that Q34 detection is robust and reproducible,  
794 and reveals increased Q34 content for tRNA<sup>His</sup> and tRNA<sup>Asn</sup> in  $\Delta crp$  strain where *tgt* expression was  
795 induced, while for tRNA<sup>Asp</sup> Q34 level remains relatively constant. *V. cholerae* tRNA<sup>Asn</sup>\_GTT1 is very low  
796 expressed and likely contains only sub-stoichiometric amounts of Q34, while analysis of tRNA<sup>Tyr</sup> is  
797 impeded by the presence of other modifications in the anticodon loop (namely i<sup>6</sup>A37 or its derivatives),  
798 which prevents the correct mapping and quantification of Q34 modifications using deletion signature.  
799 In order to evaluate Q34 levels in tRNA<sup>Tyr</sup> more specifically, we performed APB northern blots allowing  
800 visualization and quantification of Q-modified and unmodified tRNAs (51). As anticipated from  
801 increased *tgt* expression, Q-modified tRNA levels were strongly increased in  $\Delta crp$  strain. Sub-MIC TOB  
802 also increases the proportion of Q containing tRNA<sup>Tyr</sup> compared to the non-treated condition **(Fig. 6D)**.  
803 However, this result was variable suggesting a subtle fine-tuning of the Q levels depending on growth  
804 state (optical density) and TOB concentration. These results show that tRNA Q modification levels are  
805 dynamic and correlate with variations in *tgt* expression, depending on the tRNA.

806  
807  
808

#### 809 **DNA repair genes are TAT-biased**

810 We further analyzed *in silico* the codon usage of *V. cholerae* genome, and for each gene, we  
811 assigned a codon usage value to each codon **(Fig. 4C and doi:10.5281/zenodo.6875293)**. This allowed  
812 the generation of lists of genes with divergent codon usage, for each codon.

813 For genes with a tyrosine codon usage bias towards TAT in *V. cholerae*, gene ontology  
814 enrichment analysis **(Sup. Fig. S6CDE)** highlights the DNA repair category with a *p-value* of  $2.28 \times 10^{-2}$   
815 **(Sup. Fig. S6C.)** Fig. 7A shows Tyr codon usage of *V. cholerae* DNA repair genes. We hypothesized that  
816 translation of DNA repair transcripts could be more efficient in  $\Delta tgt$ , and that such basal pre-induction  
817 would be beneficial during genotoxic treatments as UV irradiation (single stranded DNA breaks). UV  
818 associated DNA damage is repaired through RecA, RecFOR and RuvAB dependent homologous  
819 recombination. Five of these genes, *recO*, *recR*, *recA* and *ruvA-ruvB*, are biased towards TAT in *V.*  
820 *cholerae* (Fig. 7A, red arrows), while their repressor LexA bears a strong bias towards TAC. DNA repair  
821 genes (e.g. *ruvA* with 80% TAT, *ruvB* with 83% TAT, *dinB* with 75% TAT) were also found to be up for  
822  $\Delta tgt$  in the Ribo-seq data, with unchanged transcription levels. *V. cholerae*  $\Delta tgt$  appears to be 4 to 9  
823 times more resistant to UV irradiation than the WT strain **(Fig. 7B)**. This is consistent with increased  
824 DNA repair efficiency in the *V. cholerae*  $\Delta tgt$  strain.

825 We also analyzed tyrosine codon usage for the DNA repair genes in *E. coli*, and did not observe  
826 the same bias **(Fig. 7C)**, with 51% TAT bias, i.e. the expected level for a random group of genes of the  
827 *E. coli* genome, and with a TAC bias for *recOR* and *recA* (red arrows) and strong TAT bias for *lexA* (blue  
828 arrow) **(Sup. Fig.S 6B, whole genome E. coli)**. These genes thus show the exact opposite bias in *E. coli*  
829 **(Fig. 7C)**. Strikingly, unlike for *V. cholerae*, *E. coli*  $\Delta tgt$  mutant did not show increased UV resistance  
830 **(Fig. 7D)**. This is consistent with the hypothesis that modification-tuned translation of codon biased  
831 transcripts can be an additional means of regulation building upon already described and well  
832 characterized transcriptional regulation pathways.

833

#### 834 **Discussion**

835 We show here that Q modification levels can be dynamic in bacteria and respond to external  
836 conditions; and that Q levels on *V. cholerae* tRNA<sup>Tyr</sup> correlate with *tgt* expression. This is clearer in  
837 conditions where *tgt* transcription is highly induced ( $\Delta crp$ ), and more variable in conditions where this

838 induction is intermediate (sub-MIC TOB). As summarized in **Fig. 8**, we propose that exposure to sub-  
839 MIC aminoglycosides increases *tgt* expression in *V. cholerae*, and impacts the decoding of tyrosine  
840 codons. The TAT biased transcripts *RsxA* is an anti-SoxR factor. SoxR controls a regulon involved in  
841 oxidative stress response and sub-MIC aminoglycosides trigger oxidative stress in *V. cholerae*(78). A  
842 link between Q and oxidative stress has also been previously found in eukaryotic organisms (24). Better  
843 decoding at TAT versus TAC codons in the absence of Q observed here in *V. cholerae* is also consistent  
844 with recent findings in human tRNAs, where the presence of Q increases translation of transcripts  
845 biased in C-ending codons (79). Our findings are in accordance with the concept of the so-called  
846 modification tunable transcripts (MoTTs)(20). We thus show that a proteins' codon content can  
847 influence its translation in a Q modification dependent way, and that this can also impact the  
848 translation of antibiotic resistance genes (here  $\beta$ -lactamase). Note that, our results do not exclude the  
849 involvement of additional Q-regulated MoTTs in the response to sub-MIC TOB, since Q modification  
850 leads to reprogramming of the whole proteome. Finally, we show that we can predict *in silico*,  
851 candidates for which translation can be modulated by the presence or absence of Q modification (e.g.  
852 DNA repair genes), which was confirmed using phenotypic tests (UV resistance).

853 Essential/housekeeping genes are generally TAC biased (**Sup. Fig. S6AB**), as well as ribosomal  
854 proteins, which carry mostly tyrosine TAC codons both in *V. cholerae* and *E. coli*. It has been proposed  
855 that codon bias corresponding to abundant tRNAs at such highly expressed genes, guarantees their  
856 proper expression and avoids titration of tRNAs, allowing for efficient expression of the rest of the  
857 proteome(80). Induction of *tgt* by stress could also possibly be a signal for the cell to favor the synthesis  
858 of essential factors. Our results are also consistent with the fact that synonymous mutations can  
859 influence the expression of genes(81).

860 *V. cholerae* is the model organism for different species of *Vibrio*. We have previously shown that *V.*  
861 *cholerae*'s response to sub-MIC antibiotic stress is transposable to other Gram-negative pathogens  
862 (78,82), while there are differences between *E. coli* and *V. cholerae*, in the response to sub-MIC  
863 antibiotics and oxidative stress phenotypes (78,82,83). Here, we have also addressed some of the  
864 effects of TOB in *E. coli*  $\Delta$ *tgt* mutant. In *E. coli*, the deletion of *tgt* has a less dramatic effect on the  
865 susceptibility to TOB ((1) and **Sup. Fig S4F**). *V. cholerae* and *E. coli* globally show similar tyrosine codon  
866 usage in their genomes (**Sup. Fig. S6AB**). However, *E. coli* *rsxA* does not display a codon bias towards  
867 TAT, and neither do DNA repair genes. One can think that in regard to MoTTs, different organisms have  
868 evolved according to the environments where they grow, selecting the integration of specific stress  
869 response pathways under specific post-transcriptional regulations.

870 It was recently shown that *E. coli*  $\Delta$ *tgt* strain is more resistant than the WT to nickel toxicity, most  
871 certainly because the nickel importer genes *nikABCDE* are less expressed, but the underlying molecular  
872 mechanism had not been elucidated(28). As *NikR*, the repressor of the *nik* operon is enriched in TAT  
873 codons (100%), a more efficient translation of the *nikR* gene in the absence of Q would lead to the  
874 observed repression phenotype. In addition, the nickel exporter gene *rcnA* is also enriched in TAT  
875 (100%), while one of the genes for subunits of the nickel importer *nikD* is enriched in TAC codons  
876 (100%). In combination this could explain the clear resistance of the *tgt* strain to high levels of nickel.

877 However, protein levels are not always in line with the codon bias predictions. The positions of the  
878 codons of interest and their sequence context may also be important for differential translation. The  
879 presence of the codon of interest in the 5'-end vs 3'-end of a transcript could have a bigger impact on  
880 the efficiency of translation (84,85). A recent study testing TAC/TAT codons placed between two genes  
881 in a translational fusion yielded different results compared to our constructs with the tested codons at  
882 the 5' of the transcript(86). Similarly, the distance between two codons of interest, or the identity of  
883 the nearby codons may be important. The translation of highly transcribed genes and genes with low  
884 levels of mRNAs could be dissimilar. Codon usage may also directly impact gene expression at mRNA  
885 levels with an effect on transcription termination(87), especially for constitutive genes. Thus, the  
886 search for MoTTs could be facilitated by comparing transcriptomics to proteomics data, and additional  
887 experiments need to be performed to elucidate post-transcriptional regulation-related phenotypes,  
888 but the differential expression of specific TAT/TAC biased proteins finally allows to propose a model  
889 for the pleiotropic phenotype caused by Q deficiency in *E. coli*.

890 Studies, mostly in eukaryotes, reveal that tRNA modifications are dynamic and not static as  
891 initially thought (88-90). Modification levels depend on growth (91,92), environmental changes (93)  
892 and stress (reviewed in (62)). Stress regulated tRNA modification levels have an impact on the  
893 translation of regulators, which in turn trigger translational reprogramming and optimized responses  
894 to stress (2,94,95). We show here that *tgt* expression is regulated by sub-MIC TOB, the stringent  
895 response and CRP, and that tRNA<sup>Tyr</sup> Q modification levels increase with *tgt* expression. The fact that  
896 such correlation between *tgt* expression and Q levels does not occur for all tRNAs (e.g. tRNA<sup>Asp</sup>),  
897 indicates that other parameters also influence Q modification levels. One possibility is that other  
898 modifications, such as those on the anticodon loop of tRNA<sup>Tyr</sup>, may influence the way Tgt modifies  
899 these tRNAs, as documented for other modification circuits (22,96). Tgt may also bind these tRNAs  
900 differently (for a review on modification specificity (62)). Since sub-MIC TOB triggers the stringent  
901 response, one hypothesis could be that sub-MIC TOB induces *tgt* through stringent response  
902 activation. The stringent response is usually triggered upon starvation, for example when amino acids  
903 are scarce. *tgt* expression was also recently shown to be regulated by tyrosine levels and to affect  
904 tRNA-Tyr codon choice in *Trypanosoma brucei*(97).

905 Regarding CRP, the carbon catabolite regulator, it represses transcription of *tgt*. Interestingly, *V.*  
906 *cholerae* *crp* carries only TAC codons for tyrosine, and is strongly down-regulated in  $\Delta$ *tgt* in our Ribo-  
907 seq data, while its transcription levels remain unchanged. The downregulation of CRP translation when  
908 Q modifications are low (as in the  $\Delta$ *tgt* strain), could be a way to de-repress *tgt* and increase Q  
909 modification levels. Note that CRP is involved in natural competence of *V. cholerae*, during growth on  
910 crustacean shells where horizontal gene transfer occurs. One can thus speculate that during exogenous  
911 DNA uptake, *tgt* repression by CRP could lead to better decoding of AT rich (i.e. TAT biased) mRNAs.  
912 Thus, modulation of *tgt* levels during natural transformation may modulate the expression of  
913 horizontally transferred genes, which by definition may bear different GC content and codon usage.  
914 Moreover, if *tgt* expression is repressed by CRP during competence state, this would favor the  
915 translation of TAT-biased DNA repair genes and possibly recombination of incoming DNA into the  
916 chromosome. Translational reprogramming in response to DNA damage can thus be an advantageous  
917 property selected during evolution.

918 Our results also demonstrate that we can identify other Q-dependent MoTT candidates using *in*  
919 *silico* codon usage analysis. In fact, since we now have extensively calculated the codon usage biases  
920 at all codons for *V. cholerae* and *E. coli* genes, this approach is readily adaptable to any tRNA  
921 modification for which we know the differentially translated codons. Such regulation may be a possible  
922 way to tune the expression of essential or newly acquired genes, differing in GC-content. It may also,  
923 in some cases, explain antibiotic resistance profiles in bacterial collections with established genome  
924 sequences, and for which observed phenotypic resistance does not always correlate with known  
925 resistance factors(98). Further studies are needed to characterize the determinants of tRNA  
926 modification-dependent translational reprogramming.

927

## 928 **Acknowledgements**

929 We thank Dr. Francesca Tuorto for sharing the protocol for APB northern blots. Many thanks to  
930 Dr. Paola Arimondo for discussions about setting up the queuosine mass spectrometry experiments.  
931 We also thank, for RNA-seq experiments, E. Turc, L. Lemée, T. Cokelaer, Biomics Platform, C2RT,  
932 Institut Pasteur, Paris, France, supported by France Génomique (ANR-10-INBS-09) and IBISA. We would  
933 like to acknowledge Valérie Bourguignon (IMoPA, UMR7365 CNRS-UL) for her help in validation of  
934 queuosine modification protocol, and Enora Corler for her help with Ribo-seq analysis.

935 This research was funded by the Institut Pasteur, the Centre National de la Recherche Scientifique  
936 (CNRS-UMR 3525), ANR ModRNAntibio (ANR-21-CE35-0012), ANR-LabEx [ANR-10-LABX-62-IBEID], the  
937 Fondation pour la Recherche Médicale (FRM EQU202103012569), the Institut Pasteur grant PTR 245-  
938 19 and by the National Institute of General Medical Sciences (NIGMS) grant GM70641 to V dC-L. AB

939 was funded by Institut Pasteur Roux-Cantarini fellowship. The authors acknowledge a DIM1Health  
940 2019 grant from the Région Ile de France to the project EpiK for the LCMS equipment.

941 **Author contributions**

942 Conceived and designed the analysis: ZB, DM; Collected the data: ZB, LF, AB, AC, ML, MD, BL, QG-G,  
943 FB, CF, GS, IH; Contributed data or analysis tools: BL, ON, CF, MM, MD, QG-G, FB, HA, VdC-L, VM, YM;  
944 Performed the analysis: ZB, LF, AB, AC, ML, BL; Wrote the paper: ZB, VdC-L.

## 945 References

946

- 947 1. Babosan, A., Fruchard, L., Krin, E., Carvalho, A., Mazel, D. and Baharoglu, Z. (2022) Non-essential  
948 tRNA and rRNA modifications impact the bacterial response to sub-MIC antibiotic stress. *microLife*.
- 949 2. Pollo-Oliveira, L. and de Crecy-Lagard, V. (2019) Can Protein Expression Be Regulated by  
950 Modulation of tRNA Modification Profiles? *Biochemistry*, **58**, 355-362.
- 951 3. Suzuki, T. (2021) The expanding world of tRNA modifications and their disease relevance. *Nat Rev*  
952 *Mol Cell Biol*.
- 953 4. Chujo, T. and Tomizawa, K. (2021) Human transfer RNA modopathies: diseases caused by  
954 aberrations in transfer RNA modifications. *FEBS J*, **288**, 7096-7122.
- 955 5. Zhong, W., Koay, A., Ngo, A., Li, Y., Nah, Q., Wong, Y.H., Chionh, Y.H., Ng, H.Q., Koh-Stenta,  
956 X., Poulsen, A. *et al.* (2019) Targeting the Bacterial Epitranscriptome for Antibiotic Development:  
957 Discovery of Novel tRNA-(N(1)G37) Methyltransferase (TrmD) Inhibitors. *ACS Infect Dis*, **5**, 326-  
958 335.
- 959 6. de Crecy-Lagard, V. and Jaroch, M. (2021) Functions of Bacterial tRNA Modifications: From  
960 Ubiquity to Diversity. *Trends Microbiol*, **29**, 41-53.
- 961 7. Urbonavicius, J., Qian, Q., Durand, J.M., Hagervall, T.G. and Bjork, G.R. (2001) Improvement of  
962 reading frame maintenance is a common function for several tRNA modifications. *EMBO J*, **20**,  
963 4863-4873.
- 964 8. Taylor, D.E., Trieber, C.A., Trescher, G. and Bekkering, M. (1998) Host mutations (*miaA* and *rpsL*)  
965 reduce tetracycline resistance mediated by Tet(O) and Tet(M). *Antimicrob Agents Chemother*, **42**, 59-  
966 64.
- 967 9. Parker, J. (1982) Specific mistranslation in hisT mutants of Escherichia coli. *Mol Gen Genet*, **187**,  
968 405-409.
- 969 10. Bruni, C.B., Colantuoni, V., Sbordone, L., Cortese, R. and Blasi, F. (1977) Biochemical and  
970 regulatory properties of Escherichia coli K-12 hisT mutants. *J Bacteriol*, **130**, 4-10.
- 971 11. Thongdee, N., Jaroensuk, J., Atichartpongkul, S., Chittrakanwong, J., Chooyoung, K., Srimahaeak,  
972 T., Chaiyen, P., Vattanaviboon, P., Mongkolsuk, S. and Fuangthong, M. (2019) TrmB, a tRNA  
973 m7G46 methyltransferase, plays a role in hydrogen peroxide resistance and positively modulates  
974 the translation of *katA* and *katB* mRNAs in *Pseudomonas aeruginosa*. *Nucleic Acids Res*, **47**, 9271-  
975 9281.
- 976 12. Aubee, J.I., Olu, M. and Thompson, K.M. (2016) The i6A37 tRNA modification is essential for  
977 proper decoding of UUX-Leucine codons during *rpoS* and *iraP* translation. *RNA*, **22**, 729-742.
- 978 13. Vecerek, B., Moll, I. and Blasi, U. (2007) Control of Fur synthesis by the non-coding RNA RyhB  
979 and iron-responsive decoding. *EMBO J*, **26**, 965-975.
- 980 14. Hou, Y.M., Matsubara, R., Takase, R., Masuda, I. and Sulkowska, J.I. (2017) TrmD: A Methyl  
981 Transferase for tRNA Methylation With m(1)G37. *Enzymes*, **41**, 89-115.
- 982 15. Chionh, Y.H., McBee, M., Babu, I.R., Hia, F., Lin, W., Zhao, W., Cao, J., Dziergowska, A.,  
983 Malkiewicz, A., Begley, T.J. *et al.* (2016) tRNA-mediated codon-biased translation in mycobacterial  
984 hypoxic persistence. *Nature communications*, **7**, 13302.
- 985 16. Fleming, B.A., Blango, M.G., Rousek, A.A., Kincannon, W.M., Tran, A., Lewis, A.J., Russell, C.W.,  
986 Zhou, Q., Baird, L.M., Barber, A.E. *et al.* (2022) A tRNA modifying enzyme as a tunable regulatory  
987 nexus for bacterial stress responses and virulence. *Nucleic Acids Res*.
- 988 17. Thompson, K.M. and Gottesman, S. (2014) The MiaA tRNA modification enzyme is necessary for  
989 robust RpoS expression in Escherichia coli. *J Bacteriol*, **196**, 754-761.

- 990 18. Kimura, S., Dedon, P.C. and Waldor, M.K. (2020) Comparative tRNA sequencing and RNA mass  
991 spectrometry for surveying tRNA modifications. *Nat Chem Biol*, **16**, 964-972.
- 992 19. Masuda, I., Matsubara, R., Christian, T., Rojas, E.R., Yadavalli, S.S., Zhang, L., Goulian, M., Foster,  
993 L.J., Huang, K.C. and Hou, Y.M. (2019) tRNA Methylation Is a Global Determinant of Bacterial  
994 Multi-drug Resistance. *Cell Syst*, **8**, 302-314 e308.
- 995 20. Endres, L., Dedon, P.C. and Begley, T.J. (2015) Codon-biased translation can be regulated by  
996 wobble-base tRNA modification systems during cellular stress responses. *RNA Biol*, **12**, 603-614.
- 997 21. Advani, V.M. and Ivanov, P. (2019) Translational Control under Stress: Reshaping the Translatome.  
998 *Bioessays*, **41**, e1900009.
- 999 22. Ehrenhofer-Murray, A.E. (2017) Cross-Talk between Dnmt2-Dependent tRNA Methylation and  
1000 Queuosine Modification. *Biomolecules*, **7**.
- 1001 23. Meier, F., Suter, B., Grosjean, H., Keith, G. and Kubli, E. (1985) Queuosine modification of the  
1002 wobble base in tRNA<sup>His</sup> influences 'in vivo' decoding properties. *EMBO J*, **4**, 823-827.
- 1003 24. Nagaraja, S., Cai, M.W., Sun, J., Varet, H., Sarid, L., Trebicz-Geffen, M., Shaulov, Y., Mazumdar,  
1004 M., Legendre, R., Coppee, J.Y. *et al.* (2021) Queuine Is a Nutritional Regulator of *Entamoeba*  
1005 *histolytica* Response to Oxidative Stress and a Virulence Attenuator. *mBio*, **12**.
- 1006 25. Manickam, N., Joshi, K., Bhatt, M.J. and Farabaugh, P.J. (2016) Effects of tRNA modification on  
1007 translational accuracy depend on intrinsic codon-anticodon strength. *Nucleic Acids Res*, **44**, 1871-  
1008 1881.
- 1009 26. Manickam, N., Nag, N., Abbasi, A., Patel, K. and Farabaugh, P.J. (2014) Studies of translational  
1010 misreading in vivo show that the ribosome very efficiently discriminates against most potential  
1011 errors. *RNA*, **20**, 9-15.
- 1012 27. Noguchi, S., Nishimura, Y., Hirota, Y. and Nishimura, S. (1982) Isolation and characterization of  
1013 an *Escherichia coli* mutant lacking tRNA-guanine transglycosylase. Function and biosynthesis of  
1014 queuosine in tRNA. *J Biol Chem*, **257**, 6544-6550.
- 1015 28. Pollo-Oliveira, L., Davis, N., Hossain, I., Ho, P., Yuan, Y., Garcia, P.S., Pereira, C., Byrne, S.R.,  
1016 Leng, J., Sze, M. *et al.* (2022) The absence of the Queuosine tRNA modification leads to pleiotropic  
1017 phenotypes revealing perturbations of metal and oxidative stress homeostasis in *Escherichia coli*  
1018 K12. *Metalomics*.
- 1019 29. Koo, M.S., Lee, J.H., Rah, S.Y., Yeo, W.S., Lee, J.W., Lee, K.L., Koh, Y.S., Kang, S.O. and Roe,  
1020 J.H. (2003) A reducing system of the superoxide sensor SoxR in *Escherichia coli*. *EMBO J*, **22**,  
1021 2614-2622.
- 1022 30. Silva-Rocha, R., Martinez-Garcia, E., Calles, B., Chavarria, M., Arce-Rodriguez, A., de Las Heras,  
1023 A., Paez-Espino, A.D., Durante-Rodriguez, G., Kim, J., Nikel, P.I. *et al.* (2013) The Standard  
1024 European Vector Architecture (SEVA): a coherent platform for the analysis and deployment of  
1025 complex prokaryotic phenotypes. *Nucleic Acids Res*, **41**, D666-675.
- 1026 31. Kessler, B., Timmis, K.N. and de Lorenzo, V. (1994) The organization of the P<sub>m</sub> promoter of the  
1027 TOL plasmid reflects the structure of its cognate activator protein XylS. *Mol Gen Genet*, **244**, 596-  
1028 605.
- 1029 32. Lang, M.N., Krin, E., Korlowski, C., Sismeiro, O., Varet, H., Coppee, J.Y., Mazel, D. and  
1030 Baharoglu, Z. (2021) Sleeping ribosomes: Bacterial signaling triggers RaiA mediated persistence to  
1031 aminoglycosides. *Iscience*, **24**.
- 1032 33. Sabeti Azad, M., Okuda, M., Cyrenne, M., Bourge, M., Heck, M.P., Yoshizawa, S. and Fourmy, D.  
1033 (2020) Fluorescent aminoglycoside antibiotics and methods for accurately monitoring uptake by  
1034 bacteria. *ACS Infect Dis*.
- 1035 34. Okuda, M. (2015), Université Paris Sud - Paris XI.

- 1036 35. Baharoglu, Z., Bikard, D. and Mazel, D. (2010) Conjugative DNA transfer induces the bacterial  
1037 SOS response and promotes antibiotic resistance development through integron activation. *PLoS*  
1038 *Genet*, **6**, e1001165.
- 1039 36. El Mortaji, L., Tejada-Arranz, A., Rifflet, A., Boneca, I.G., Pehau-Arnaudet, G., Radicella, J.P.,  
1040 Marsin, S. and De Reuse, H. (2020) A peptide of a type I toxin-antitoxin system induces  
1041 *Helicobacter pylori* morphological transformation from spiral shape to coccoids. *Proc Natl Acad Sci*  
1042 *U S A*, **117**, 31398-31409.
- 1043 37. Lo Scudato, M. and Blokesch, M. (2012) The regulatory network of natural competence and  
1044 transformation of *Vibrio cholerae*. *PLoS Genet*, **8**, e1002778.
- 1045 38. Cormack, B.P., Valdivia, R.H. and Falkow, S. (1996) FACS-optimized mutants of the green  
1046 fluorescent protein (GFP). *Gene*, **173**, 33-38.
- 1047 39. Elowitz, M.B. and Leibler, S. (2000) A synthetic oscillatory network of transcriptional regulators.  
1048 *Nature*, **403**, 335-338.
- 1049 40. Erde, J., Loo, R.R. and Loo, J.A. (2014) Enhanced FASP (eFASP) to increase proteome coverage  
1050 and sample recovery for quantitative proteomic experiments. *J Proteome Res*, **13**, 1885-1895.
- 1051 41. Cox, J., Neuhauser, N., Michalski, A., Scheltema, R.A., Olsen, J.V. and Mann, M. (2011)  
1052 Andromeda: a peptide search engine integrated into the MaxQuant environment. *J Proteome Res*, **10**,  
1053 1794-1805.
- 1054 42. Tyanova, S., Temu, T. and Cox, J. (2016) The MaxQuant computational platform for mass  
1055 spectrometry-based shotgun proteomics. *Nat Protoc*, **11**, 2301-2319.
- 1056 43. Wieczorek, S., Combes, F., Lazar, C., Gai Gianetto, Q., Gatto, L., Dorffer, A., Hesse, A.M., Coute,  
1057 Y., Ferro, M., Bruley, C. *et al.* (2017) DAPAR & ProStaR: software to perform statistical analyses  
1058 in quantitative discovery proteomics. *Bioinformatics*, **33**, 135-136.
- 1059 44. Ritchie, M.E., Phipson, B., Wu, D., Hu, Y., Law, C.W., Shi, W. and Smyth, G.K. (2015) limma  
1060 powers differential expression analyses for RNA-sequencing and microarray studies. *Nucleic Acids*  
1061 *Res*, **43**, e47.
- 1062 45. Gai Gianetto, Q., Combes, F., Ramus, C., Bruley, C., Coute, Y. and Burger, T. (2016) Calibration  
1063 plot for proteomics: A graphical tool to visually check the assumptions underlying FDR control in  
1064 quantitative experiments. *Proteomics*, **16**, 29-32.
- 1065 46. Pounds, S. and Cheng, C. (2006) Robust estimation of the false discovery rate. *Bioinformatics*, **22**,  
1066 1979-1987.
- 1067 47. Krin, E., Pierle, S.A., Sismeiro, O., Jagla, B., Dillies, M.A., Varet, H., Irazoki, O., Campoy, S., Rouy,  
1068 Z., Cruveiller, S. *et al.* (2018) Expansion of the SOS regulon of *Vibrio cholerae* through extensive  
1069 transcriptome analysis and experimental validation. *BMC Genomics*, **19**, 373.
- 1070 48. Andersen, J.B., Sternberg, C., Poulsen, L.K., Bjorn, S.P., Givskov, M. and Molin, S. (1998) New  
1071 unstable variants of green fluorescent protein for studies of transient gene expression in bacteria.  
1072 *Appl Environ Microbiol*, **64**, 2240-2246.
- 1073 49. Galvanin, A., Ayadi, L., Helm, M., Motorin, Y. and Marchand, V. (2019) Mapping and  
1074 Quantification of tRNA 2'-O-Methylation by RiboMethSeq. *Methods Mol Biol*, **1870**, 273-295.
- 1075 50. Katanski, C.D., Watkins, C.P., Zhang, W., Reyer, M., Miller, S. and Pan, T. (2022) Analysis of  
1076 queuosine and 2-thio tRNA modifications by high throughput sequencing. *Nucleic Acids Res*, **50**,  
1077 e99.
- 1078 51. Cirzi, C. and Tuorto, F. (2021) Analysis of Queuosine tRNA Modification Using APB Northern  
1079 Blot Assay. *Methods Mol Biol*, **2298**, 217-230.
- 1080 52. Francois, P., Arbes, H., Demais, S., Baudin-Baillieu, A. and Namy, O. (2021) RiboDoc: A Docker-  
1081 based package for ribosome profiling analysis. *Comput Struct Biotechnol J*, **19**, 2851-2860.

- 1082 53. Dingwall, C., Lomonosoff, G.P. and Laskey, R.A. (1981) High sequence specificity of micrococcal  
1083 nuclease. *Nucleic Acids Res*, **9**, 2659-2673.
- 1084 54. Li, H. (2018) Minimap2: pairwise alignment for nucleotide sequences. *Bioinformatics*, **34**, 3094-3100.
- 1085 55. McKinney, W. (2010) Data Structures for Statistical Computing in Python. *Stéfan van der Walt, Jarrod*  
1086 *Millman, editors. , Proceedings of the 9th Python in Science Conference*, 56--61.
- 1087 56. Reback J, M.W., jbrockmendel, den Bossche JV, Augspurger T, Cloud P, et al. (2021) pandas-  
1088 dev/pandas: Pandas 1.2.4.
- 1089 57. Virtanen, P., Gommers, R., Oliphant, T.E., Haberland, M., Reddy, T., Cournapeau, D., Burovski,  
1090 E., Peterson, P., Weckesser, W., Bright, J. *et al.* (2020) SciPy 1.0: fundamental algorithms for  
1091 scientific computing in Python. *Nat Methods*, **17**, 261-272.
- 1092 58. JD., H. (2007) Matplotlib: A 2D Graphics Environment. . *Computing in Science & Engineering*, **9**, 90--  
1093 95.
- 1094 59. ML, W. (2021) Seaborn: Statistical Data Visualization. *Journal of Open Source Software*, **6**, :3021.
- 1095 60. Kluyver T, R.-K.B., Pérez F, Granger B, Bussonnier M, Frederic J, et al. (2016) Jupyter Notebooks  
1096 -- a publishing format for reproducible computational workflows., **Loizides Fernando, Schmidt**  
1097 **Birgit, editors**, 87--90.
- 1098 61. Molder, F., Jablonski, K.P., Letcher, B., Hall, M.B., Tomkins-Tinch, C.H., Sochat, V., Forster, J.,  
1099 Lee, S., Twardziok, S.O., Kanitz, A. *et al.* (2021) Sustainable data analysis with Snakemake.  
1100 *F1000Res*, **10**, 33.
- 1101 62. Barraud, P. and Tisne, C. (2019) To be or not to be modified: Miscellaneous aspects influencing  
1102 nucleotide modifications in tRNAs. *IUBMB Life*, **71**, 1126-1140.
- 1103 63. Tuorto, F., Legrand, C., Cirzi, C., Federico, G., Liebers, R., Muller, M., Ehrenhofer-Murray, A.E.,  
1104 Dittmar, G., Grone, H.J. and Lyko, F. (2018) Queuosine-modified tRNAs confer nutritional  
1105 control of protein translation. *EMBO J*, **37**.
- 1106 64. Jackman, J.E. and Alfonzo, J.D. (2013) Transfer RNA modifications: nature's combinatorial  
1107 chemistry playground. *Wiley interdisciplinary reviews. RNA*, **4**, 35-48.
- 1108 65. Addepalli, B. and Limbach, P.A. (2016) Pseudouridine in the Anticodon of Escherichia coli  
1109 tRNA<sup>Tyr</sup>(QPsiA) Is Catalyzed by the Dual Specificity Enzyme RluF. *J Biol Chem*, **291**, 22327-22337.
- 1110 66. Carvalho, A., Mazel, D. and Baharoglu, Z. (2021) Deficiency in cytosine DNA methylation leads to  
1111 high chaperonin expression and tolerance to aminoglycosides in *Vibrio cholerae*. *Plos Genetics*, **17**.
- 1112 67. Rivera, M., Hancock, R.E., Sawyer, J.G., Haug, A. and McGroarty, E.J. (1988) Enhanced binding  
1113 of polycationic antibiotics to lipopolysaccharide from an aminoglycoside-supersusceptible, tolA  
1114 mutant strain of *Pseudomonas aeruginosa*. *Antimicrob Agents Chemother*, **32**, 649-655.
- 1115 68. Kimura, S. and Waldor, M.K. (2019) The RNA degradosome promotes tRNA quality control  
1116 through clearance of hypomodified tRNA. *Proc Natl Acad Sci U S A*, **116**, 1394-1403.
- 1117 69. Doucet, N., De Wals, P.Y. and Pelletier, J.N. (2004) Site-saturation mutagenesis of Tyr-105 reveals  
1118 its importance in substrate stabilization and discrimination in TEM-1 beta-lactamase. *J Biol Chem*,  
1119 **279**, 46295-46303.
- 1120 70. Escobar, W.A., Miller, J. and Fink, A.L. (1994) Effects of site-specific mutagenesis of tyrosine 105  
1121 in a class A beta-lactamase. *Biochem J*, **303 ( Pt 2)**, 555-558.
- 1122 71. Jacob, F., Joris, B., Lepage, S., Dusart, J. and Frere, J.M. (1990) Role of the conserved amino acids  
1123 of the 'SDN' loop (Ser130, Asp131 and Asn132) in a class A beta-lactamase studied by site-directed  
1124 mutagenesis. *Biochem J*, **271**, 399-406.
- 1125 72. Mohammad, F., Green, R. and Buskirk, A.R. (2019) A systematically-revised ribosome profiling  
1126 method for bacteria reveals pauses at single-codon resolution. *Elife*, **8**.



- 1127 73. Negro, V., Krin, E., Aguilar Pierle, S., Chaze, T., Giai Gianetto, Q., Kennedy, S.P., Matondo, M.,  
1128 Mazel, D. and Baharoglu, Z. (2019) RadD Contributes to R-Loop Avoidance in Sub-MIC  
1129 Tobramycin. *MBio*, **10**.
- 1130 74. Bielecki, P., Muthukumarasamy, U., Eckweiler, D., Bielecka, A., Pohl, S., Schanz, A., Niemeyer, U.,  
1131 Oumeraci, T., von Neuhoff, N., Ghigo, J.M. *et al.* (2014) In vivo mRNA profiling of uropathogenic  
1132 *Escherichia coli* from diverse phylogroups reveals common and group-specific gene expression  
1133 profiles. *mBio*, **5**, e01075-01014.
- 1134 75. Manneh-Roussel, J., Haycocks, J.R.J., Magan, A., Perez-Soto, N., Voelz, K., Camilli, A., Krachler,  
1135 A.M. and Grainger, D.C. (2018) cAMP Receptor Protein Controls *Vibrio cholerae* Gene  
1136 Expression in Response to Host Colonization. *MBio*, **9**.
- 1137 76. Carvalho, A., Krin, E., Korlowski, C., Mazel, D. and Baharoglu, Z. (2021) Interplay between  
1138 Sublethal Aminoglycosides and Quorum Sensing: Consequences on Survival in *V. cholerae*. *Cells*,  
1139 **10**.
- 1140 77. Kolmsee, T., Delic, D., Agyenim, T., Calles, C. and Wagner, R. (2011) Differential stringent control  
1141 of *Escherichia coli* rRNA promoters: effects of ppGpp, DksA and the initiating nucleotides.  
1142 *Microbiology (Reading)*, **157**, 2871-2879.
- 1143 78. Baharoglu, Z., Krin, E. and Mazel, D. (2013) RpoS Plays a Central Role in the SOS Induction by  
1144 Sub-Lethal Aminoglycoside Concentrations in *Vibrio cholerae*. *Plos Genetics*, **9**.
- 1145 79. Huber, S.M., Begley, U., Sarkar, A., Gasperi, W., Davis, E.T., Surampudi, V., Lee, M., Melendez,  
1146 J.A., Dedon, P.C. and Begley, T.J. (2022) Arsenite toxicity is regulated by queuine availability and  
1147 oxidation-induced reprogramming of the human tRNA epitranscriptome. *Proc Natl Acad Sci U S A*,  
1148 **119**, e2123529119.
- 1149 80. Frumkin, I., Lajoie, M.J., Gregg, C.J., Hornung, G., Church, G.M. and Pilpel, Y. (2018) Codon  
1150 usage of highly expressed genes affects proteome-wide translation efficiency. *Proc Natl Acad Sci U*  
1151 *S A*, **115**, E4940-E4949.
- 1152 81. Kudla, G., Murray, A.W., Tollervey, D. and Plotkin, J.B. (2009) Coding-sequence determinants of  
1153 gene expression in *Escherichia coli*. *Science*, **324**, 255-258.
- 1154 82. Gutierrez, A., Laureti, L., Crussard, S., Abida, H., Rodriguez-Rojas, A., Blazquez, J., Baharoglu, Z.,  
1155 Mazel, D., Darfeuille, F., Vogel, J. *et al.* (2013) beta-lactam antibiotics promote bacterial mutagenesis  
1156 via an RpoS-mediated reduction in replication fidelity. *Nature communications*, **4**, 1610.
- 1157 83. Baharoglu, Z. and Mazel, D. (2011) *Vibrio cholerae* Triggers SOS and Mutagenesis in Response to  
1158 a Wide Range of Antibiotics: a Route towards Multiresistance. *Antimicrobial Agents and Chemotherapy*,  
1159 **55**, 2438-2441.
- 1160 84. Osterman, I.A., Chervontseva, Z.S., Evfratov, S.A., Sorokina, A.V., Rodin, V.A., Rubtsova, M.P.,  
1161 Komarova, E.S., Zatsepin, T.S., Kabilov, M.R., Bogdanov, A.A. *et al.* (2020) Translation at first  
1162 sight: the influence of leading codons. *Nucleic Acids Res*, **48**, 6931-6942.
- 1163 85. Boel, G., Letso, R., Neely, H., Price, W.N., Wong, K.H., Su, M., Luff, J., Valecha, M., Everett, J.K.,  
1164 Acton, T.B. *et al.* (2016) Codon influence on protein expression in *E. coli* correlates with mRNA  
1165 levels. *Nature*, **529**, 358-363.
- 1166 86. Kimura, S., Srisuknimit, V., McCarty, K.L., Dedon, P.C., Kranzusch, P.J. and Waldor, M.K. (2022)  
1167 Sequential action of a tRNA base editor in conversion of cytidine to pseudouridine. *Nature*  
1168 *communications*, **13**, 5994.
- 1169 87. Zhao, F., Zhou, Z., Dang, Y., Na, H., Adam, C., Lipzen, A., Ng, V., Grigoriev, I.V. and Liu, Y.  
1170 (2021) Genome-wide role of codon usage on transcription and identification of potential regulators.  
1171 *Proc Natl Acad Sci U S A*, **118**.
- 1172 88. Chan, C.T., Dyavaiah, M., DeMott, M.S., Taghizadeh, K., Dedon, P.C. and Begley, T.J. (2010) A  
1173 quantitative systems approach reveals dynamic control of tRNA modifications during cellular  
1174 stress. *PLoS Genet*, **6**, e1001247.

- 1175 89. Torrent, M., Chalancon, G., de Groot, N.S., Wuster, A. and Madan Babu, M. (2018) Cells alter their  
1176 tRNA abundance to selectively regulate protein synthesis during stress conditions. *Sci Signal*, **11**.
- 1177 90. Chan, C.T., Pang, Y.L., Deng, W., Babu, I.R., Dyavaiah, M., Begley, T.J. and Dedon, P.C. (2012)  
1178 Reprogramming of tRNA modifications controls the oxidative stress response by codon-biased  
1179 translation of proteins. *Nature communications*, **3**, 937.
- 1180 91. Keith, G., Rogg, H., Dirheimer, G., Menichi, B. and Heyham, T. (1976) Post-transcriptional  
1181 modification of tyrosine tRNA as a function of growth in *Bacillus subtilis*. *FEBS Lett*, **61**, 120-123.
- 1182 92. Moukadiri, I., Garzon, M.J., Bjork, G.R. and Armengod, M.E. (2014) The output of the tRNA  
1183 modification pathways controlled by the *Escherichia coli* MnmEG and MnmC enzymes depends  
1184 on the growth conditions and the tRNA species. *Nucleic Acids Res*, **42**, 2602-2623.
- 1185 93. Frey, B., McCloskey, J., Kersten, W. and Kersten, H. (1988) New function of vitamin B12:  
1186 cobamide-dependent reduction of epoxyqueuosine to queuosine in tRNAs of *Escherichia coli* and  
1187 *Salmonella typhimurium*. *J Bacteriol*, **170**, 2078-2082.
- 1188 94. Persson, B.C. (1993) Modification of tRNA as a regulatory device. *Mol Microbiol*, **8**, 1011-1016.
- 1189 95. Galvanin, A., Vogt, L.M., Grober, A., Freund, I., Ayadi, L., Bourguignon-Igel, V., Bessler, L., Jacob,  
1190 D., Eigenbrod, T., Marchand, V. *et al.* (2020) Bacterial tRNA 2'-O-methylation is dynamically  
1191 regulated under stress conditions and modulates innate immune response. *Nucleic Acids Res*, **48**,  
1192 12833-12844.
- 1193 96. Han, L. and Phizicky, E.M. (2018) A rationale for tRNA modification circuits in the anticodon  
1194 loop. *RNA*, **24**, 1277-1284.
- 1195 97. Dixit, S., Kessler, A.C., Henderson, J., Pan, X., Zhao, R., D'Almeida, G.S., Kulkarni, S., Rubio,  
1196 M.A.T., Hegedusova, E., Ross, R.L. *et al.* (2021) Dynamic queuosine changes in tRNA couple  
1197 nutrient levels to codon choice in *Trypanosoma brucei*. *Nucleic Acids Res*, **49**, 12986-12999.
- 1198 98. Oprea, M., Njamkepo, E., Cristea, D., Zhukova, A., Clark, C.G., Kravetz, A.N., Monakhova, E.,  
1199 Ciontea, A.S., Cojocaru, R., Rauzier, J. *et al.* (2020) The seventh pandemic of cholera in Europe  
1200 revisited by microbial genomics. *Nature communications*, **11**, 5347.

1201  
1202

## 1203 Figure legends

1204 **Figure 1. *V. cholerae*  $\Delta$ tgt shows decreased aminoglycoside tolerance. A.** Competition experiments between  
1205 WT and  $\Delta$ tgt with the indicated antibiotic or oxidant at sub-MIC concentration. NT: non-treated. TOB: tobramycin  
1206 0.6  $\mu$ g/ml; CIP: ciprofloxacin 0.01  $\mu$ g/ml; CRB: carbenicillin 2.5  $\mu$ g/ml; PQ: paraquat 10  $\mu$ M; H<sub>2</sub>O<sub>2</sub>: 2mM. **B.**  
1207 Competition experiments between WT and  $\Delta$ tgt carrying the indicated plasmids. MH: non-treated. **CDEF.** Survival  
1208 of exponential phase cultures after various times of incubation (indicated in minutes on the X-axis) with the  
1209 indicated antibiotic at lethal concentration: 5MIC: 5 times the MIC; 10MIC: 10 times the MIC. **G.** PMF  
1210 measurement of exponential phase cultures using fluorescent Mitotracker dye, measured using flow cytometry.  
1211 **H.** Neomycin uptake measurement by flow cytometry using fluorescent Cy5 coupled neomycin. **I.** Competition  
1212 experiments between WT and  $\Delta$ tgt carrying either empty plasmid (p0), or a plasmid overexpressing tRNA-Tyr  
1213 with the native GUA anti-codon, or with the synthetic AUA anticodon. The anticodon sequence is indicated (e.g.  
1214 tRNA<sup>Tyr</sup>AUA decodes the TAT codon). NT: non-treated. TOB: tobramycin 0.6  $\mu$ g/ml. For multiple comparisons,  
1215 we used one-way ANOVA. \*\*\*\* means  $p < 0.0001$ , \*\*\* means  $p < 0.001$ , \*\* means  $p < 0.01$ , \* means  $p < 0.05$ . ns:  
1216 non-significant. Number of replicates for each experiment:  $3 < n < 8$ .

1217 **Figure 2. Codon decoding differences for *V. cholerae* WT and  $\Delta$ tgt. A. to E. Codon specific translation efficiency**  
1218 **in WT and  $\Delta$ tgt using 6x codon stretches inserted in GFP.** Y axis represents the relative fluorescence of a given  
1219 GFP in  $\Delta$ tgt over the same construct in WT. NT: non-treated; TOB: tobramycin at 0.4  $\mu$ g/ml. Each specified codon  
1220 is repeated 6x within the coding sequence of the GFP (e.g. TACTACTACTACTACTAC). For multiple comparisons,  
1221 we used one-way ANOVA. \*\*\*\* means  $p < 0.0001$ , \*\*\* means  $p < 0.001$ , \*\* means  $p < 0.01$ , \* means  $p < 0.05$ . ns:  
1222 non-significant. Number of replicates for each experiment:  $3 < n$ , each dot represents one replicate.

1223 **Figure 3. Differential translation at tyrosine codons evaluated by growth on carbenicillin of mutated  $\beta$ -**  
1224 **lactamase reporters.** The catalytic tyrosine at position 103 was tested in its native sequence (TAC), or with the  
1225 synonymous TAT mutation. **A to D.** Growth on microtiter plates. Growth was followed by measuring the OD 620  
1226 nm every 15 minutes during 800 minutes. CARB was used at 100  $\mu$ g/ml. A and C: not TOB. B and D: TOB at 0.2  
1227  $\mu$ g/ml (20% of MIC).

1228 **Figure 4. Post-transcriptional regulation in  $\Delta$ tgt and Tyr codon usage bias. A. and B.** Volcano plots showing less  
1229 and more abundant proteins in proteomics analysis (performed in triplicates) in  $\Delta$ tgt compared to WT during  
1230 growth without antibiotics (A. where MH is the growth medium), or in sub-MIC TOB at 0.4  $\mu$ g/ml (B.). **C.** Codon  
1231 usage bias calculation example with VC1017 *rsxA* tyrosine TAC and TAT codons. **D. to G.** Plots showing codon  
1232 usage bias for genes lists that are up or down in ribosome profiling analysis (performed in triplicates), for codons  
1233 decoded by tRNAs with Q modification. Each dot represents one gene of the lists.

1234 **Figure 5. Post-transcriptional upregulation of *RsxA* in  $\Delta$ tgt due to a Tyr codon bias towards TAT and toxicity in**  
1235 **sub-MIC TOB. A.** *rsxA* mRNA levels measured by digital RT-PCR. **B.** Transcriptional expression levels from the *rsxA*  
1236 promoter measured by flow cytometry. **C.** Translational fusion of *rsxA* to *gfp* and *gfp* alone, with differences in  
1237 codon usage. \*\*\* means  $p < 0.001$ , \*\* means  $p < 0.01$ . ns: non-significant. **D.** Relative OD 620 nm of WT strain  
1238 carrying either empty plasmid or plasmid overexpressing *RsxA* comparing growth in sub-MIC TOB divided by  
1239 growth in the absence of treatment.

1240 **Figure 6. Regulation of *tgt* expression and tRNA Q levels. A:** *tgt* transcript levels measured by digital-RT-PCR. Y-  
1241 axis represents relative abundance compared to the non-treated (NT) condition in WT. For multiple comparisons,  
1242 we used one-way ANOVA (for A. C. E.). \*\*\*\* means  $p < 0.0001$ , \*\*\* means  $p < 0.001$ , \*\* means  $p < 0.01$ . Only  
1243 significant differences are shown. **B.** Stringent response induction measured with *P1rrn-gfp* reporter shown as  
1244 fluorescence (Y-axis) as a function of growth (X-axis: OD 600 nm). **C.** Q levels in tRNA enriched RNA extracts,  
1245 measured by mass spectrometry. **D.** Northern blot and quantification of Q levels in tRNA<sup>Tyr</sup>. The lower band in  
1246 the gel corresponds to unmodified tRNA<sup>Tyr</sup>. The upper band corresponds to Q-modified tRNA-Tyr.  $\Delta$ tgt is the  
1247 negative control without modification of tRNA<sup>Tyr</sup>. Histograms show the quantification of Q-modified tRNA<sup>Tyr</sup> over  
1248 total tRNA<sup>Tyr</sup>, as follows: Q-modified tRNA<sup>Tyr</sup> / (Q-modified tRNA<sup>Tyr</sup> + tRNA<sup>Tyr</sup> without Q) = upper band / (upper band  
1249 + lower band). 2.5  $\mu$ g of in tRNA enriched RNA extracts were deposited in lanes WT NT, WT TOB and  $\Delta$ crp. 0.9  $\mu$ g  
1250 was deposited in lanes  $\Delta$ tgt. Number of replicates for each experiment: 3

1251 **Figure 7. DNA repair after UV irradiation is more efficient in *V. cholerae*  $\Delta$ tgt. A and C.** Tyrosine codon usage of  
1252 DNA repair genes A: in *V. cholerae*. C: in *E. coli*. Red indicates positive codon usage bias, i.e. TAT bias. Blue  
1253 indicates negative codon usage bias for TAT, i.e. TAC bias. **B and D.** Survival of  $\Delta$ tgt relative to WT after UV  
1254 irradiation (linear scale) B: in *V. cholerae*. D: in *E. coli*. For multiple comparisons, we used one-way ANOVA. \*\*\*\*  
1255 means  $p < 0.0001$ , ns: non-significant.

1256 **Figure 8. Model.** Upon exposure to sub-MIC aminoglycosides, the expression of *tgt* is up-regulated in *V. cholerae*  
1257 and influences the decoding of tyrosine TAC vs TAT codons. This leads to differential translation from transcripts  
1258 bearing a codon usage bias for tyrosine codons. The *rsxA* transcript bears a tyrosine codon bias and its translation  
1259 can be tuned by tRNA Q modification. RsxA is an anti-SoxR factor. SoxR controls a regulon involved in oxidative  
1260 stress response. When RsxA levels are high, SoxR is increasingly inactivated and oxidative stress response  
1261 efficiency decreases. It has been previously shown that sub-MIC aminoglycosides trigger oxidative stress in *V.*  
1262 *cholerae*(78). Increasing RsxA levels thus reduces fitness in TOB by hampering efficient oxidative stress response.  
1263 As a corollary, decreased RsxA would lead to increased expression of the SoxR regulon, which would allow for  
1264 more efficient response to oxidative stress, and increased fitness in the presence of sub-MIC TOB. We propose  
1265 that when Tgt/Q levels in tRNA increase, RsxA synthesis is low and active SoxR levels are high, facilitating the  
1266 bacterial response to aminoglycoside dependent oxidative stress.

1267

1268

1269  
1270  
1271  
1272  
1273  
1274  
1275  
1276  
1277  
1278  
1279  
1280  
1281  
1282  
1283  
1284  
1285  
1286  
1287  
1288  
1289  
1290  
1291

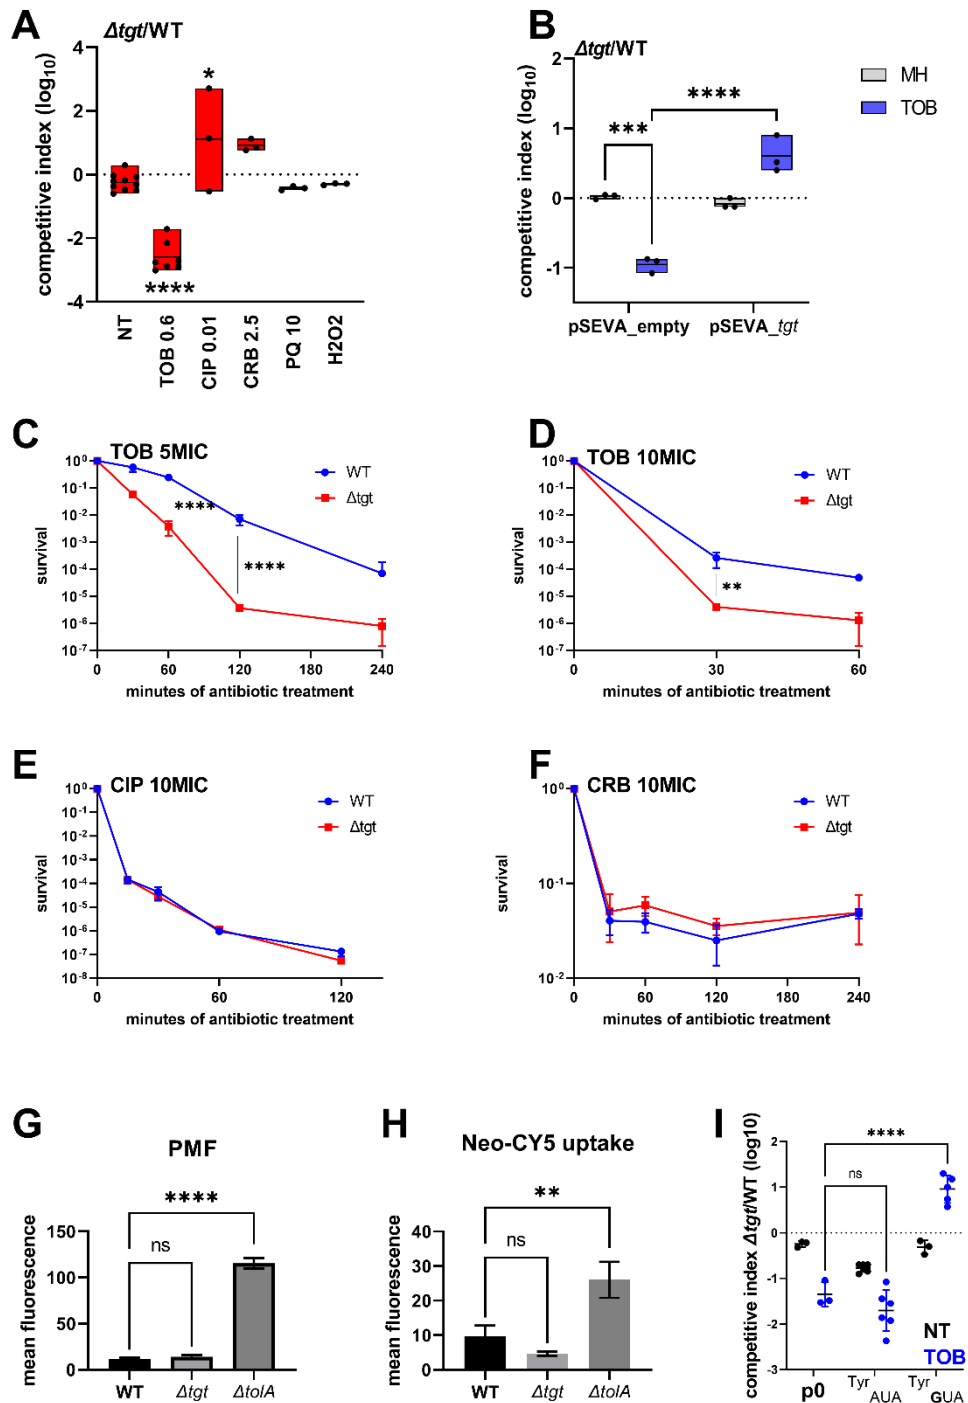

1292 **Figure 1. *V. cholerae*  $\Delta tgt$  shows decreased aminoglycoside tolerance.** **A.** Competition experiments between  
1293 WT and  $\Delta tgt$  with the indicated antibiotic or oxidant at sub-MIC concentration. *NT*: non-treated. TOB: tobramycin  
1294 0.6  $\mu\text{g/ml}$ ; CIP: ciprofloxacin 0.01  $\mu\text{g/ml}$ ; CRB: carbenicillin 2.5  $\mu\text{g/ml}$ ; PQ: paraquat 10  $\mu\text{M}$ ; H<sub>2</sub>O<sub>2</sub>: 2mM. **B.**  
1295 Competition experiments between WT and  $\Delta tgt$  carrying the indicated plasmids. MH: non-treated. **CDEF.** Survival  
1296 of exponential phase cultures after various times of incubation (indicated in minutes on the X-axis) with the  
1297 indicated antibiotic at lethal concentration: 5MIC: 5 times the MIC; 10MIC: 10 times the MIC. **G.** PMF  
1298 measurement of exponential phase cultures using fluorescent Mitotracker dye, measured using flow cytometry.  
1299 **H.** Neomycin uptake measurement by flow cytometry using fluorescent Cy5 coupled neomycin. **I.** Competition  
1300 experiments between WT and  $\Delta tgt$  carrying either empty plasmid (p0), or a plasmid overexpressing tRNA-Tyr  
1301 with the native GUA anti-codon, or with the synthetic AUA anticodon. The anticodon sequence is indicated (e.g.  
1302 tRNA<sup>Tyr</sup>AUA decodes the TAT codon). *NT*: non-treated. TOB: tobramycin 0.6  $\mu\text{g/ml}$ . For multiple comparisons,  
1303 we used one-way ANOVA. \*\*\*\* means  $p < 0.0001$ , \*\*\* means  $p < 0.001$ , \*\* means  $p < 0.01$ , \* means  $p < 0.05$ . ns:  
1304 non-significant. Number of replicates for each experiment:  $3 < n < 8$ .

1305  
1306  
1307  
1308  
1309  
1310  
1311  
1312  
1313  
1314  
1315  
1316  
1317  
1318  
1319  
1320  
1321  
1322  
1323  
1324  
1325  
1326  
1327  
1328  
1329  
1330  
1331  
1332  
1333  
1334  
1335  
1336  
1337

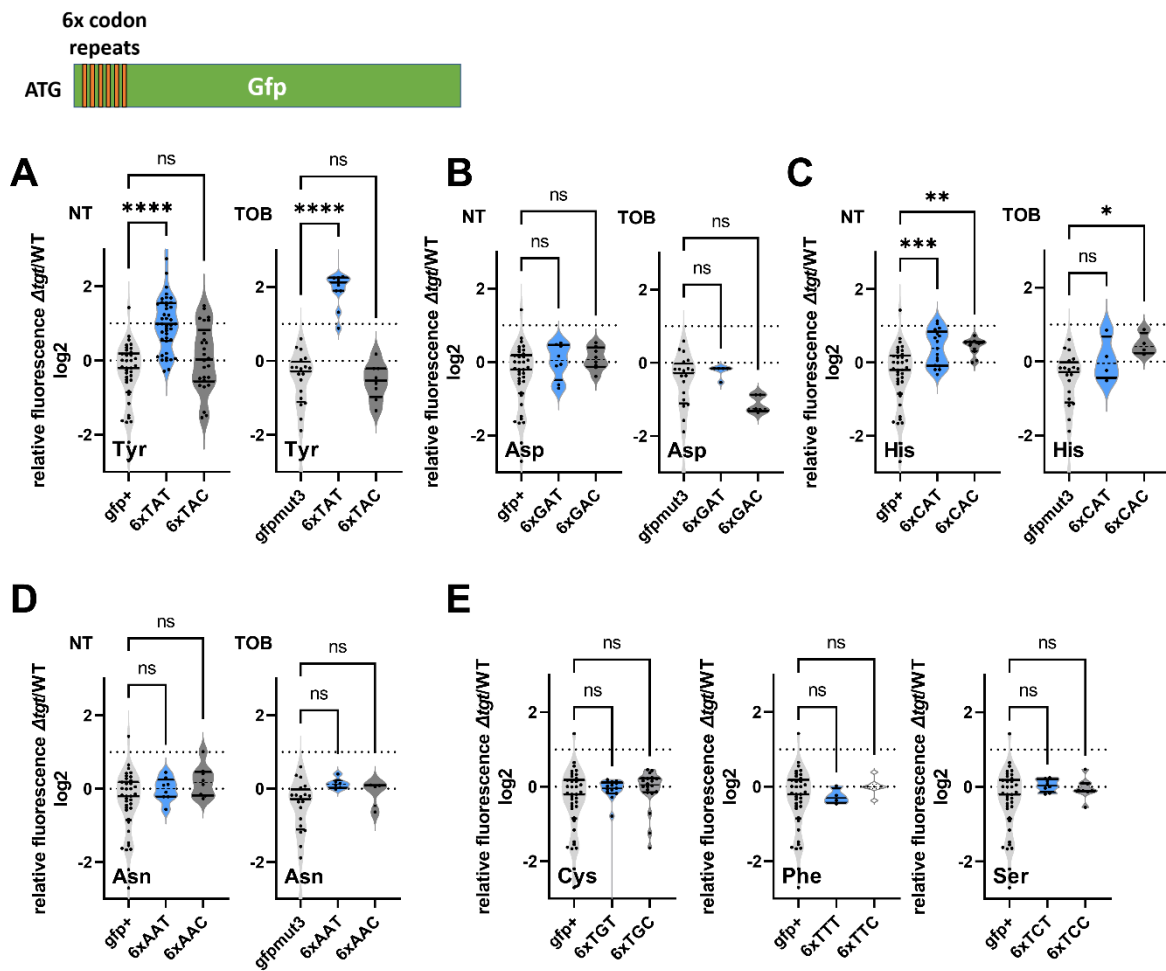

**Figure 2. Codon decoding differences for *V. cholerae* WT and  $\Delta$ tgf. A. to E. Codon specific translation efficiency in WT and  $\Delta$ tgf using 6xcodon stretches inserted in GFP. Y axis represents the relative fluorescence of a given GFP in  $\Delta$ tgf over the same construct in WT. NT: non-treated; TOB: tobramycin at 0.4  $\mu$ g/ml. Each specified codon is repeated 6x within the coding sequence of the GFP (e.g. TACTACTACTACTACTAC). For multiple comparisons, we used one-way ANOVA. \*\*\*\* means  $p < 0.0001$ , \*\*\* means  $p < 0.001$ , \*\* means  $p < 0.01$ , \* means  $p < 0.05$ . ns: non-significant. Number of replicates for each experiment:  $3 < n$ , each dot represents one replicate.**

1338

1339

1340

1341

1342

1343

1344

1345

1346

1347

1348

1349

1350

1351

1352

1353

1354

1355

1356

1357

1358

1359

1360

1361

1362

1363

1364

1365

1366

1367

1368

1369

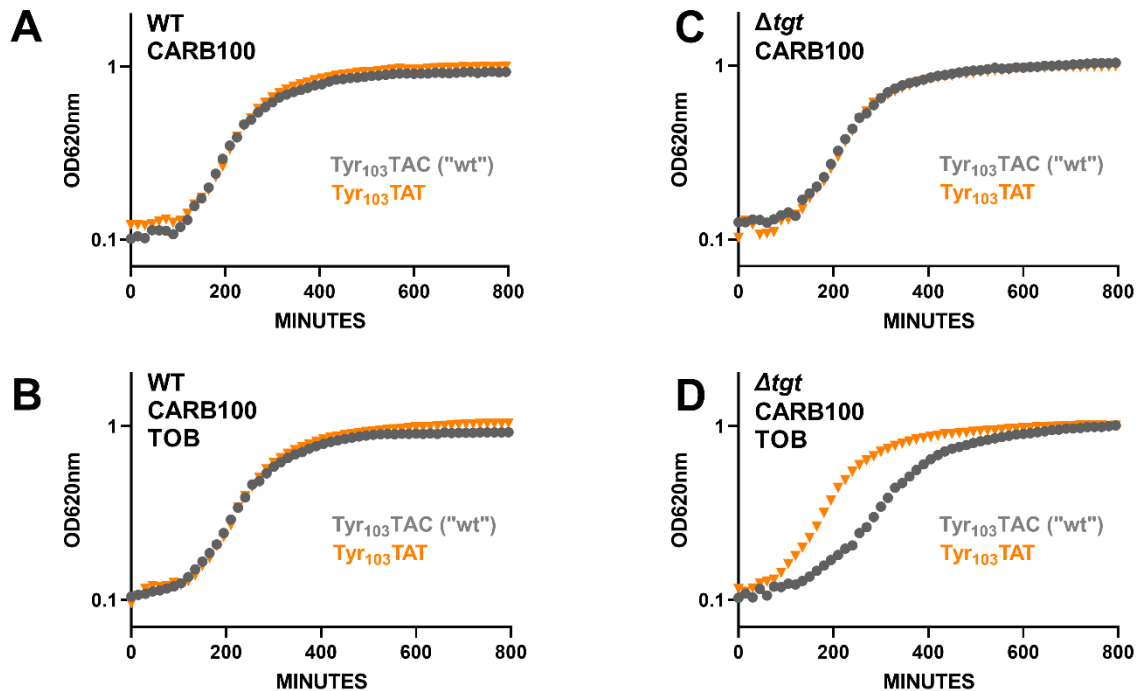

**Figure 3. Differential translation at tyrosine codons evaluated by growth on carbenicillin of mutated  $\beta$ -lactamase reporters.** The catalytic tyrosine at position 103 was tested in its native sequence (TAC), or with the synonymous TAT mutation. **A to D.** Growth on microtiter plates. Growth was followed by measuring the OD 620 nm every 15 minutes during 800 minutes. CARB was used at 100  $\mu$ g/ml. A and C: not TOB. B and D: TOB at 0.2  $\mu$ g/ml (20% of MIC).

1370  
1371  
1372  
1373  
1374  
1375  
1376  
1377  
1378  
1379  
1380  
1381  
1382  
1383  
1384  
1385  
1386  
1387  
1388  
1389  
1390  
1391  
1392  
1393  
1394  
1395  
1396  
1397

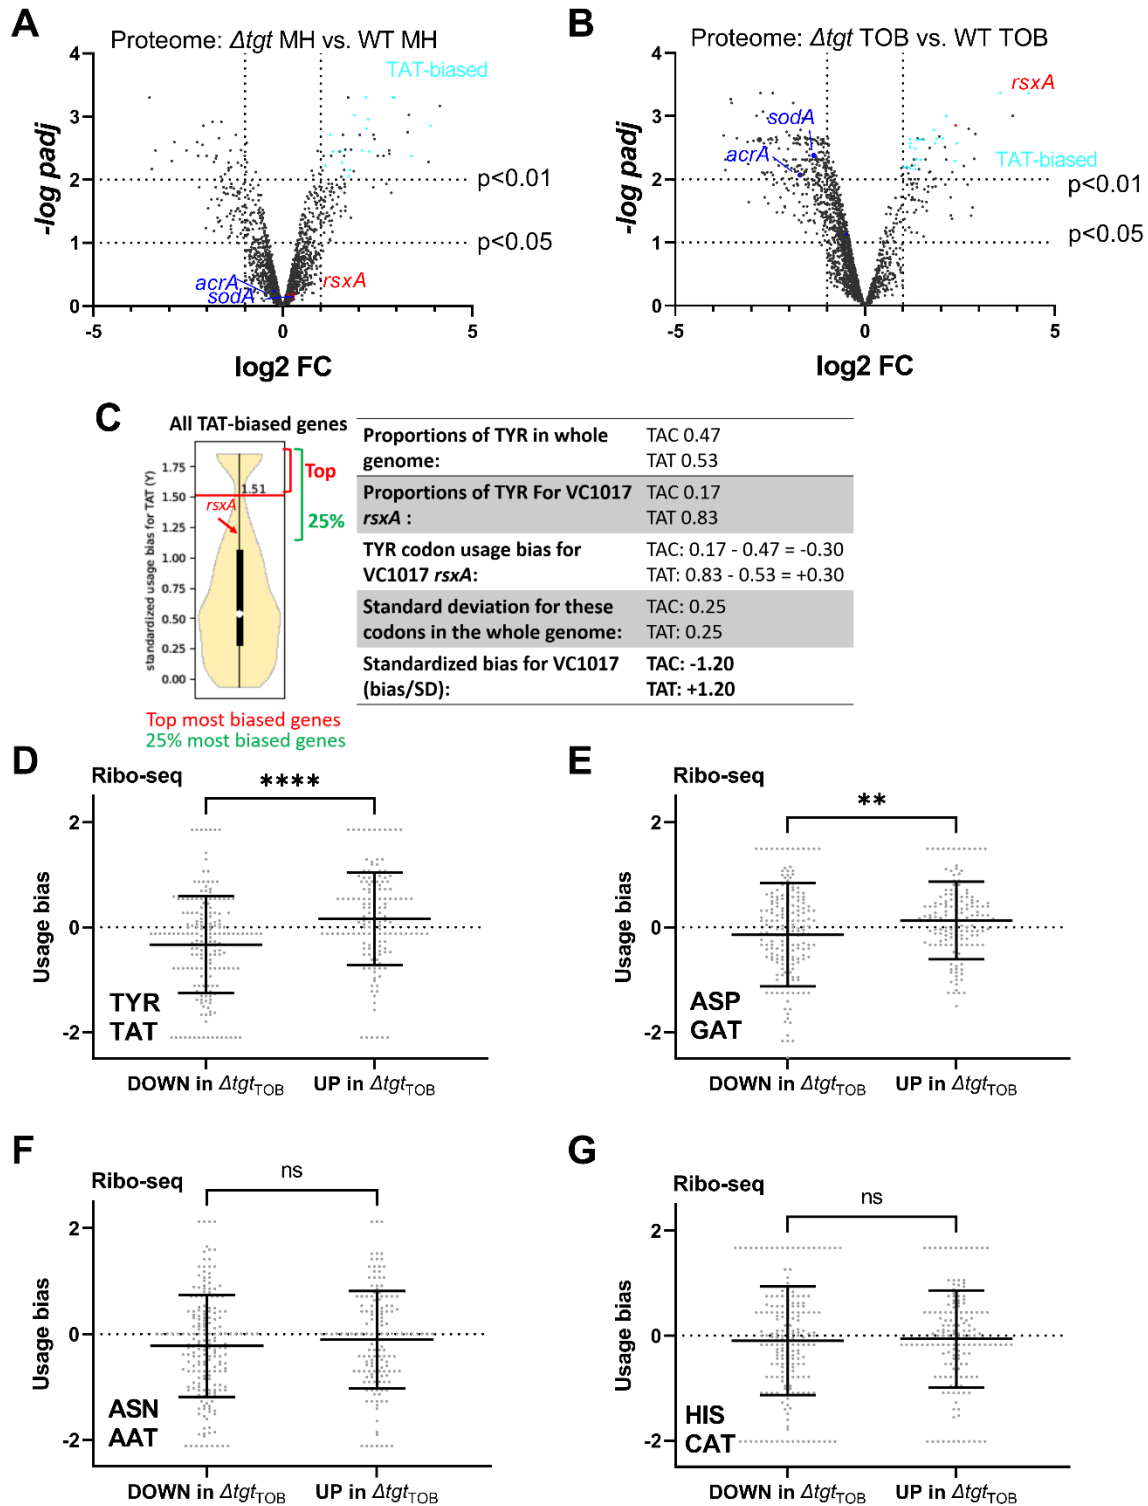

1398 **Figure 4. Post-transcriptional regulation in  $\Delta tgt$  and Tyr codon usage bias.** A. and B. Volcano plots showing less  
1399 and more abundant proteins in proteomics analysis (performed in triplicates) in  $\Delta tgt$  compared to WT during  
1400 growth without antibiotics (A. where MH is the growth medium), or in sub-MIC TOB at 0.4  $\mu\text{g}/\text{ml}$  (B.). C. Codon  
1401 usage bias calculation example with VC1017 *rsxA* tyrosine TAC and TAT codons. D. to G. Plots showing codon  
1402 usage bias for genes lists that are up or down in ribosome profiling analysis (performed in triplicates), for codons  
1403 decoded by tRNAs with Q modification. Each dot represents one gene of the lists.



1404  
1405  
1406  
1407  
1408  
1409  
1410  
1411  
1412  
1413  
1414  
1415  
1416  
1417  
1418  
1419  
1420  
1421  
1422  
1423  
1424  
1425  
1426  
1427  
1428  
1429  
1430  
1431  
1432  
1433  
1434  
1435  
1436  
1437  
1438

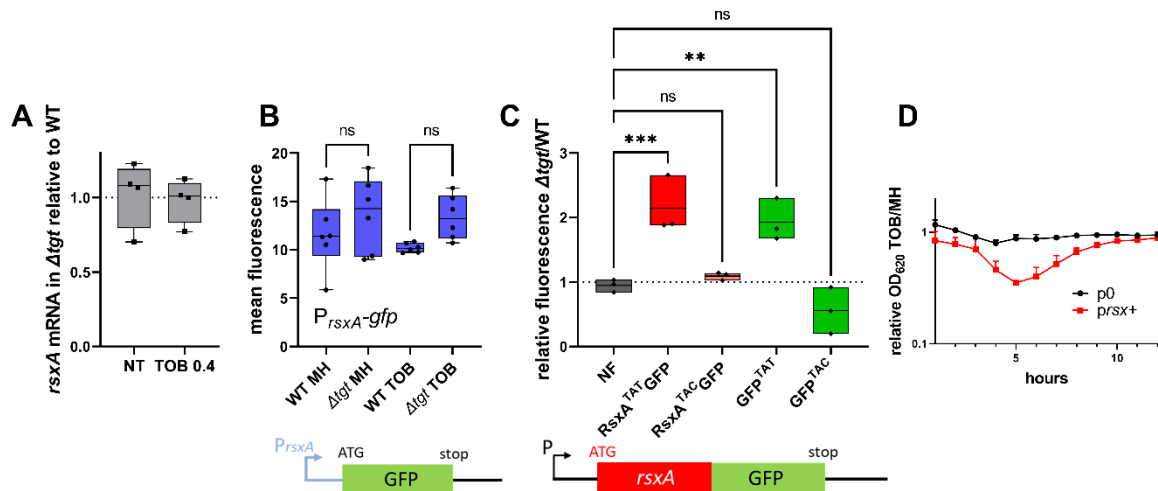

**Figure 5. Post-transcriptional upregulation of RsxA in  $\Delta tgt$  due to a Tyr codon bias towards TAT and toxicity in sub-MIC TOB.** **A.** *rsxA* mRNA levels measured by digital RT-PCR. **B.** Transcriptional expression levels from the *rsxA* promoter measured by flow cytometry. **C.** Translational fusion of *rsxA* to *gfp* and *gfp* alone, with differences in codon usage. \*\*\* means  $p < 0.001$ , \*\* means  $p < 0.01$ . ns: non-significant. **D.** Relative OD<sub>620</sub> nm of WT strain carrying either empty plasmid or plasmid overexpressing RsxA comparing growth in sub-MIC TOB divided by growth in the absence of treatment.

1439  
1440  
1441  
1442  
1443  
1444  
1445  
1446  
1447  
1448  
1449  
1450  
1451  
1452  
1453  
1454  
1455  
1456  
1457  
1458  
1459  
1460  
1461  
1462  
1463  
1464  
1465  
1466  
1467  
1468  
1469  
1470  
1471  
1472  
1473  
1474  
1475  
1476

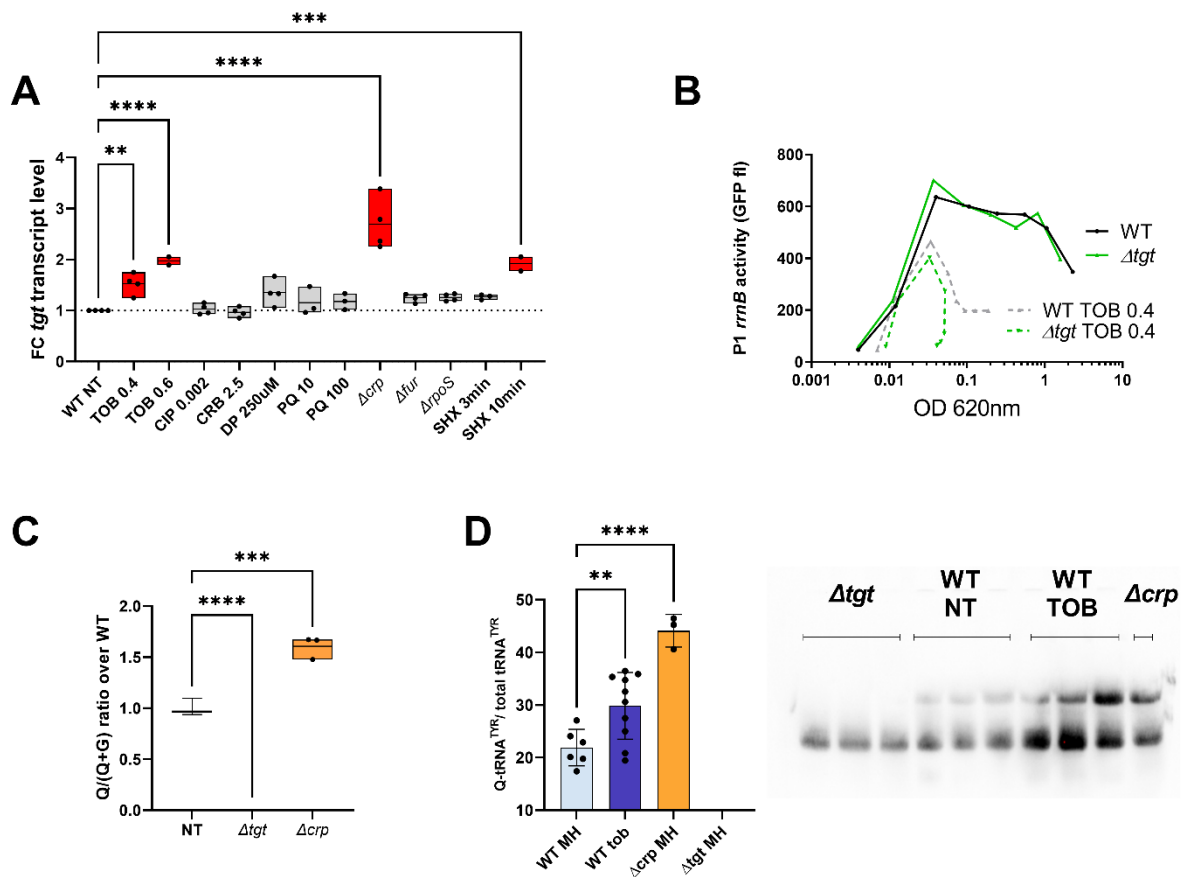

**Figure 6. Regulation of *tgt* expression and tRNA Q levels.** **A:** *tgt* transcript levels measured by digital-RT-PCR. Y-axis represents relative abundance compared to the non-treated (NT) condition in WT. For multiple comparisons, we used one-way ANOVA (for A. C. E.). \*\*\*\* means  $p < 0.0001$ , \*\*\* means  $p < 0.001$ , \*\* means  $p < 0.01$ . Only significant differences are shown. **B:** Stringent response induction measured with *P1rrn-gfp* reporter shown as fluorescence (Y-axis) as a function of growth (X-axis: OD 600 nm). **C:** Q levels in tRNA enriched RNA extracts, measured by mass spectrometry. **D:** Northern blot and quantification of Q levels in tRNA<sup>Tyr</sup>. The lower band in the gel corresponds to unmodified tRNA<sup>Tyr</sup>. The upper band corresponds to Q-modified tRNA-Tyr.  $\Delta tgt$  is the negative control without modification of tRNA<sup>Tyr</sup>. Histograms show the quantification of Q-modified tRNA<sup>Tyr</sup> over total tRNA<sup>Tyr</sup>, as follows: Q-modified tRNA<sup>Tyr</sup> / (Q-modified tRNA<sup>Tyr</sup> + tRNA<sup>Tyr</sup> without Q) = upper band / (upper band + lower band). 2.5  $\mu$ g of in tRNA enriched RNA extracts were deposited in lanes WT NT, WT TOB and  $\Delta crp$ . 0.9  $\mu$ g was deposited in lanes  $\Delta tgt$ . Number of replicates for each experiment: 3

1477

1478

1479

1480

1481

1482

1483

1484

1485

1486

1487

1488

1489

1490

1491

1492

1493

1494

1495

1496

1497

1498

1499

1500

1501

1502

1503

1504

1505

1506

1507

1508

1509

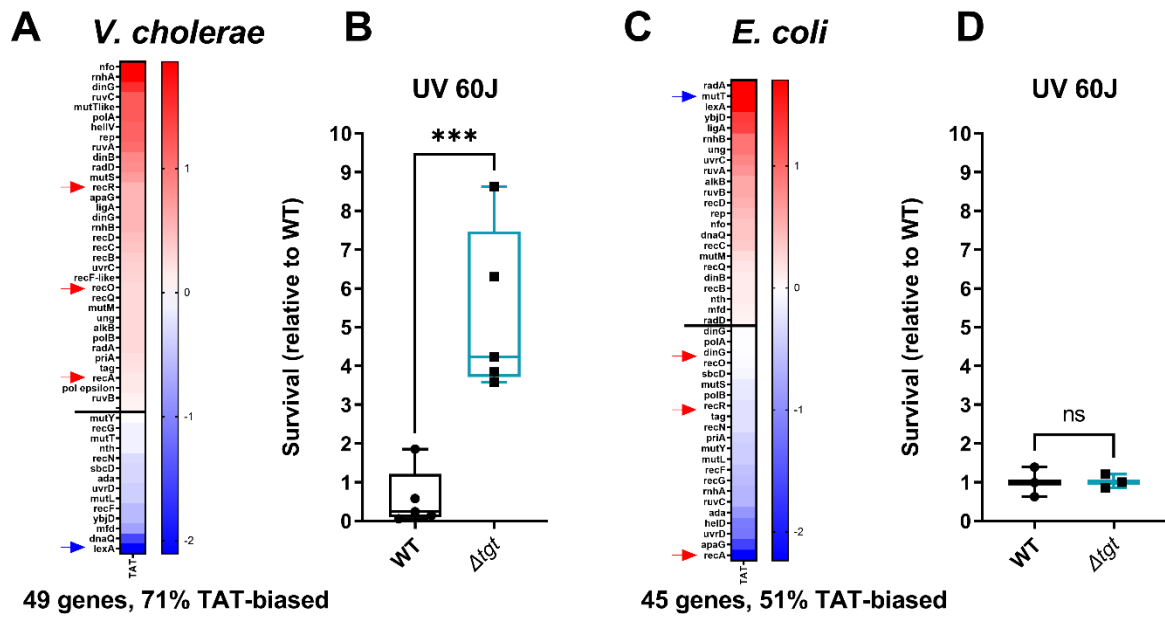

**Figure 7. DNA repair after UV irradiation is more efficient in *V. cholerae*  $\Delta$ tgt.** **A and C.** Tyrosine codon usage of DNA repair genes **A:** in *V. cholerae*. **C:** in *E. coli*. Red indicates positive codon usage bias, i.e. TAT bias. Blue indicates negative codon usage bias for TAT, i.e. TAC bias. **B and D.** Survival of  $\Delta$ tgt relative to WT after UV irradiation (linear scale) **B:** in *V. cholerae*. **D:** in *E. coli*. For multiple comparisons, we used one-way ANOVA. \*\*\*\* means  $p < 0.0001$ , ns: non-significant.

1510  
1511  
1512  
1513  
1514  
1515  
1516  
1517  
1518  
1519  
1520  
1521  
1522  
1523  
1524  
1525  
1526  
1527  
1528  
1529  
1530  
1531  
1532  
1533  
1534  
1535  
1536  
1537  
1538  
1539  
1540  
1541  
1542  
1543  
1544

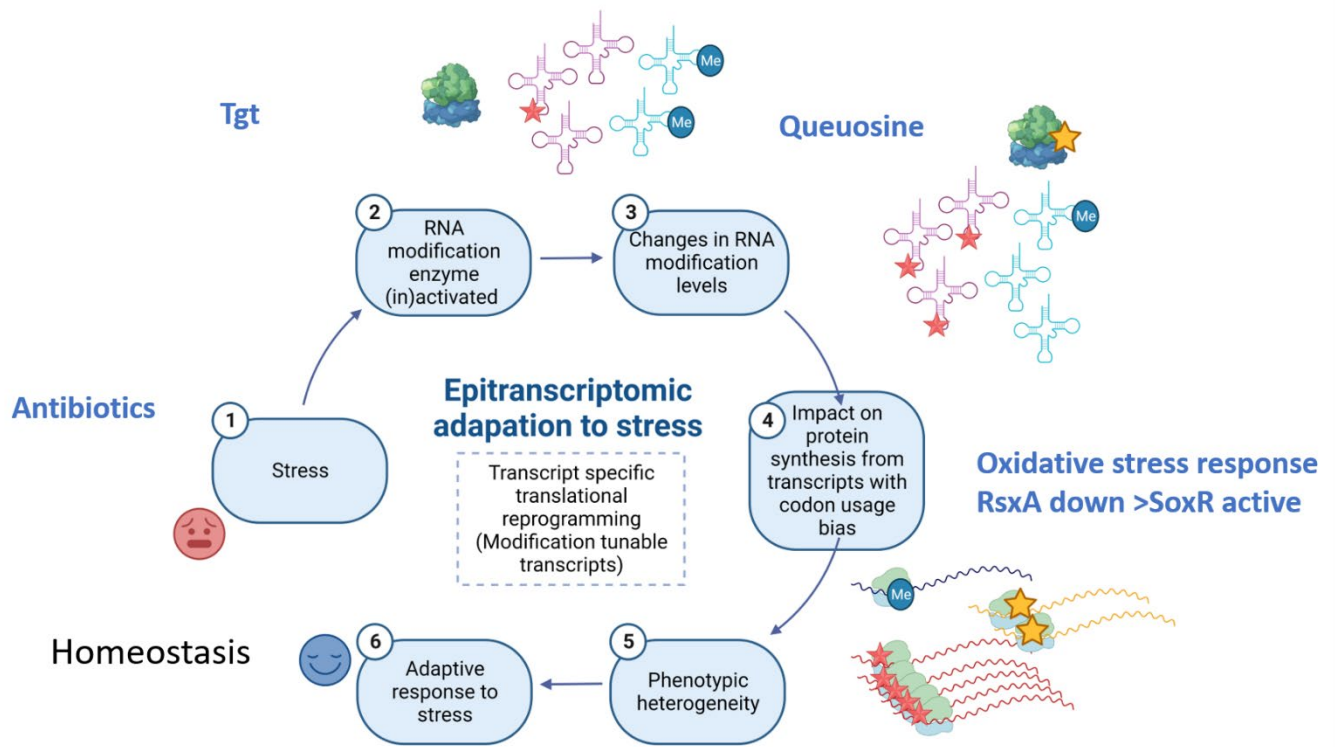

**Figure 8. Model.** Upon exposure to sub-MIC aminoglycosides, the expression of *tgt* is up-regulated in *V. cholerae* and influences the decoding of tyrosine TAC vs TAT codons. This leads to differential translation from transcripts bearing a codon usage bias for tyrosine codons. The *rsxA* transcript bears a tyrosine codon bias and its translation can be tuned by tRNA Q modification. RsaA is an anti-SoxR factor. SoxR controls a regulon involved in oxidative stress response. When RsaA levels are high, SoxR is increasingly inactivated and oxidative stress response efficiency decreases. It has been previously shown that sub-MIC aminoglycosides trigger oxidative stress in *V. cholerae*(78). Increasing RsaA levels thus reduces fitness in TOB by hampering efficient oxidative stress response. As a corollary, decreased RsaA would lead to increased expression of the SoxR regulon, which would allow for more efficient response to oxidative stress, and increased fitness in the presence of sub-MIC TOB. We propose that when Tgt/Q levels in tRNA increase, RsaA synthesis is low and active SoxR levels are high, facilitating the bacterial response to aminoglycoside dependent oxidative stress.

1545 **Supplementary Figures**

1546

1547

1548

1549

1550

1551

1552

1553

1554

1555

1556

1557

1558

1559

1560

1561

1562

1563

1564

1565

1566

1567

1568

1569

1570

1571

1572

1573

1574

1575

1576

1577

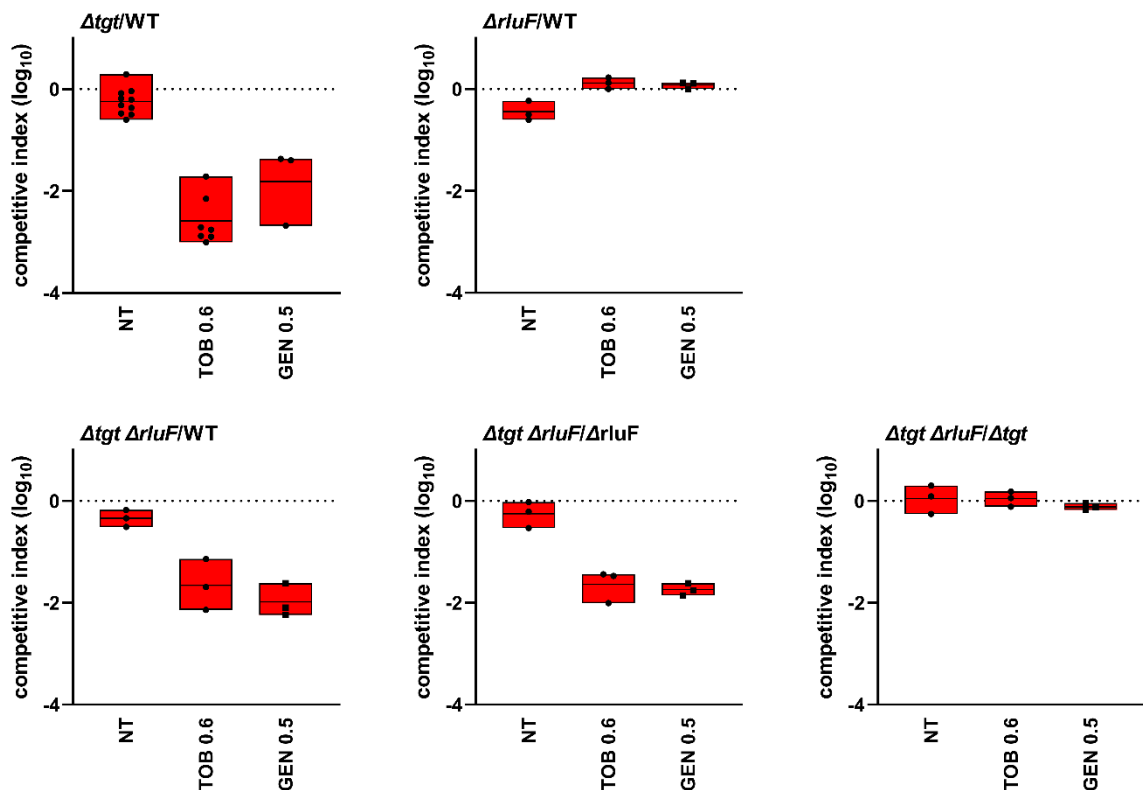

**Figure S1. No effect of *rluF* deletion on fitness in *V. cholerae* WT and  $\Delta tgt$  strains.** In vitro competition experiments of *V. cholerae* WT and mutant strains in the absence or presence of sub-MIC aminoglycosides tobramycin TOB and gentamicin (GEN) (50% of the MIC, TOB 0.6  $\mu\text{g}/\text{ml}$ , GEN 0.5  $\mu\text{g}/\text{ml}$ ). MH: no antibiotic treatment. The Y-axis represents  $\log_{10}$  of competitive index calculated as described in the methods. A competitive index of 1 indicates equal growth of both strains. The X-axis indicates growth conditions. For multiple comparisons, we used one-way ANOVA on GraphPad Prism. \*\*\*\* means  $p < 0.0001$ , \* means  $p < 0.05$ . Number of replicates for each experiment:  $3 < n < 10$ .

1578

1579

1580

1581

1582

1583

1584

1585

1586

1587

1588

1589

1590

1591

1592

1593

1594

1595

1596

1597

1598

1599

1600

1601

1602

1603

1604

1605

1606

1607

1608

1609

1610

1611

1612

1613

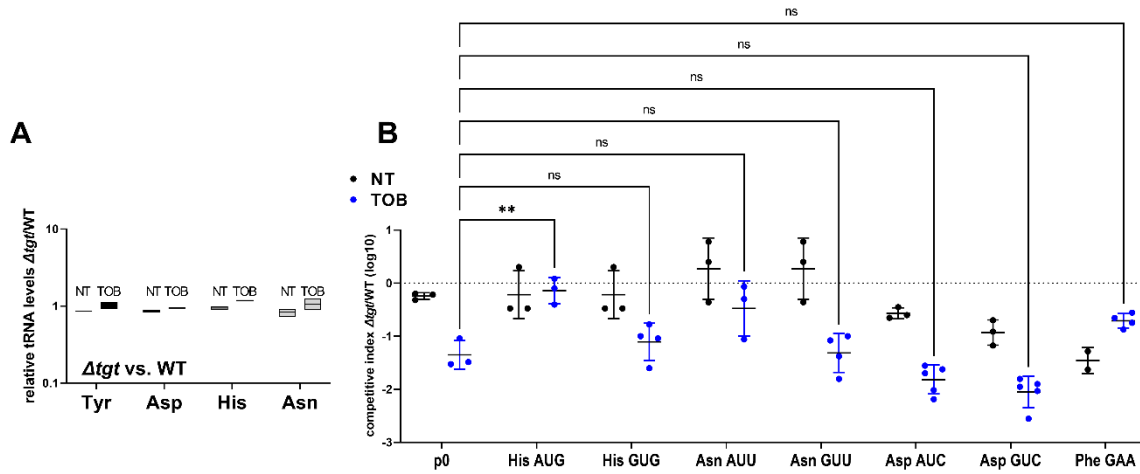

**Figure S2. Impact of tRNA overexpression on fitness during growth in sub-MIC TOB. A. Absence of *tgt* does not visibly affect endogenous tRNA-GUN levels.** qRT-PCR. A: relative tRNA abundance in  $\Delta tgt$  compared to WT strain in the absence of treatment (NT) and in the presence of sub-MIC tobramycin (TOB). B: In vitro competition experiments between *V. cholerae* WT and  $\Delta tgt$  strains, carrying a plasmid overexpressing the indicated tRNA; in the absence (NT) or presence of sub-MIC tobramycin (50% of the MIC, TOB 0.6  $\mu\text{g}/\text{ml}$ ). NT: no antibiotic treatment. The Y-axis represents log<sub>10</sub> of competitive index calculated as described in the methods. A competitive index of 1 indicates equal growth of both strains. The X-axis indicates which tRNA is overexpressed, from the high copy pTOPO plasmid. The anticodon sequence is indicated (e.g. tRNA<sup>Tyr</sup><sub>AUA</sub> decodes the TAT codon). The following tRNAs-GUN are the canonical tRNAs which are present in the genome, and modified by Tgt: Tyr<sub>GUA</sub>, His<sub>GUG</sub>, Asn<sub>GUU</sub>, Asp<sub>GUC</sub>. The following tRNAs-AUN are synthetic tRNAs which are not present in the genome: Tyr<sub>AUA</sub>, His<sub>AUG</sub>, Asn<sub>AUU</sub>, Asp<sub>AUC</sub>. tRNA<sup>Phe</sup><sub>GAA</sub> is used as non Tgt-modified control. p0 is the empty plasmid. For multiple comparisons, we used one-way ANOVA on GraphPad Prism. \*\*\*\* means p<0.0001, \* means p<0.05. Number of replicates for each experiment: 3<n<8. In A, only significant differences are indicated. ns means non-significant.

1614  
1615  
1616  
1617  
1618  
1619  
1620  
1621  
1622  
1623  
1624  
1625  
1626  
1627  
1628  
1629  
1630  
1631  
1632  
1633  
1634  
1635  
1636  
1637  
1638  
1639  
1640  
1641

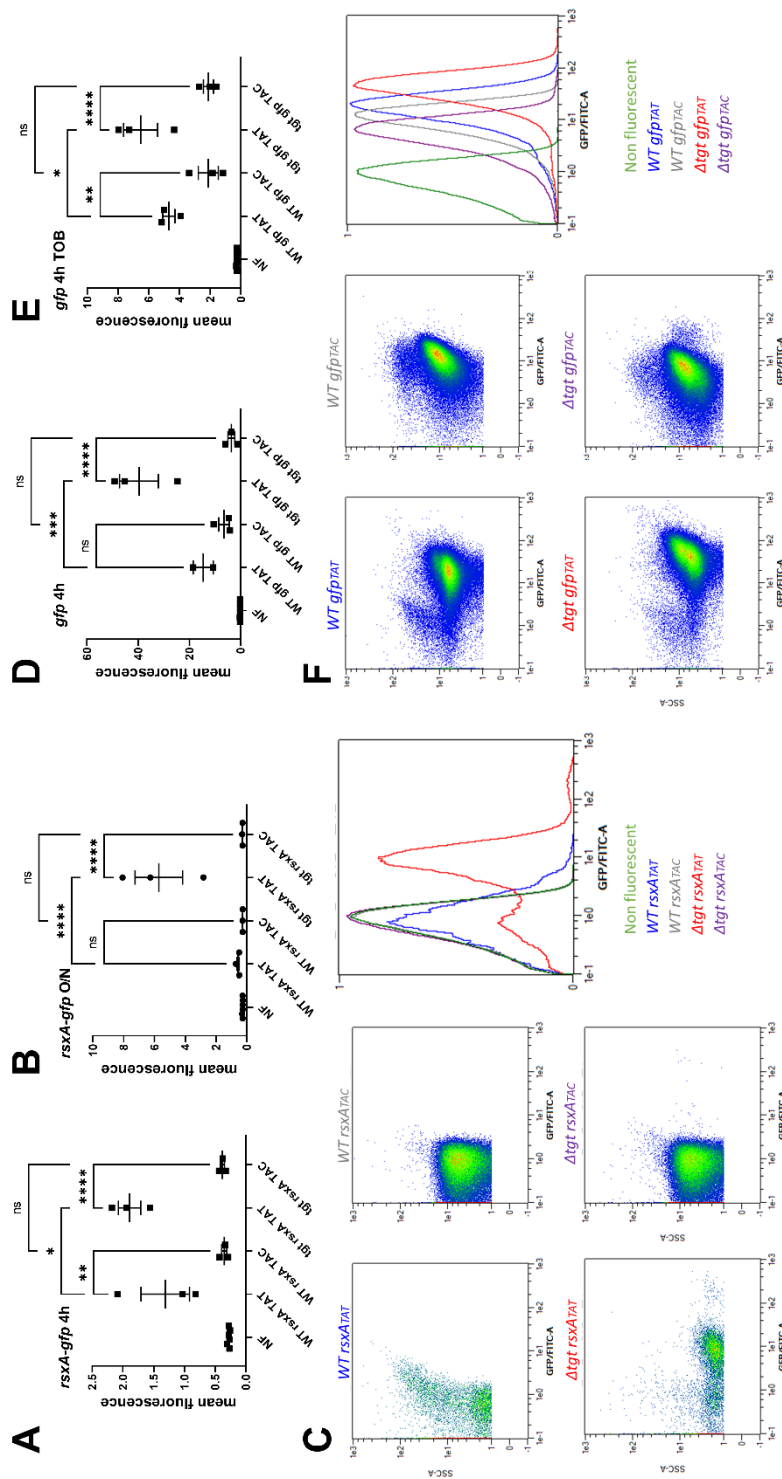

**Figure S3. Post-transcriptional upregulation of RsxA in  $\Delta$ *tgt* due to a Tyr codon bias towards TAT and toxicity in sub-MIC TOB. ABC.** Translational fusion of TAC and TAT versions of *rsxA* to *gfp* (A. 4 hours exponential phase cultures, B. overnight stationary phase cultures). **DEF.** TAC and TAT versions of *gfp* alone (C. 4 hours exponential phase cultures without antibiotics, D. in the presence of sub-MIC TOB), measured by flow cytometry. Y-axis represents mean fluorescence. **C and F** show representative examples of fluorescence observed with indicated reporters.

1648

1649

1650

1651

1652

1653

1654

1655

1656

1657

1658

1659

1660

1661

1662

1663

1664

1665

1666

1667

1668

1669

1670

1671

1672

1673

1674

1675

1676

1677

1678

1679

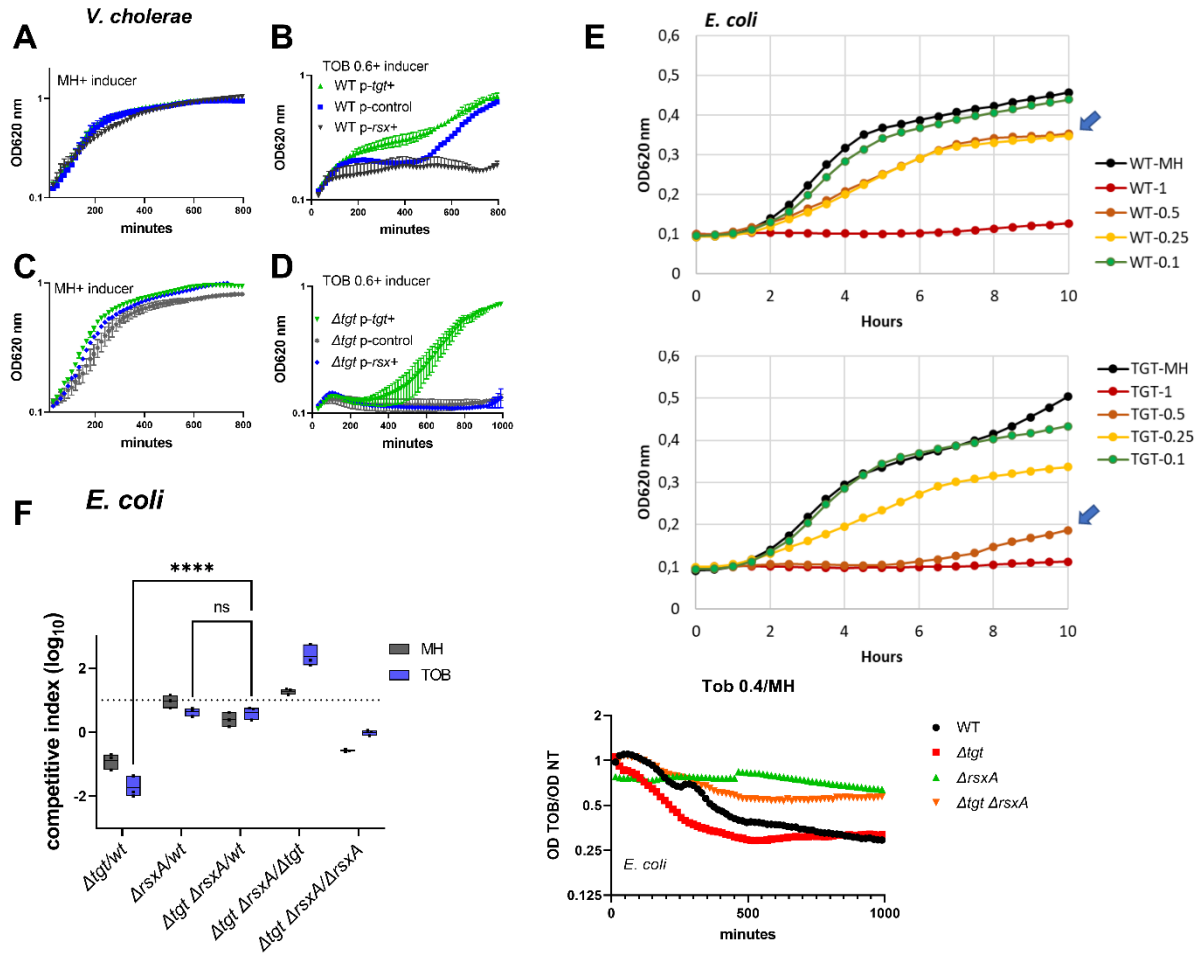

**Figure S4. *rsxA* levels impact growth in the presence of sub-MIC TOB. ABCD.** Growth curves in microtiter plate reader, in *V. cholerae* in indicated conditions. P-tgt+: pSEVA expressing *tgt*. P-rsx+: pSEVA expressing *rsxA*. P-control: empty pSEVA. **E.** Growth curves in microtiter plate reader, in *E. coli* WT and  $\Delta$ *tgt* in MH or in the presence of tobramycin at the indicated concentrations (in  $\mu$ g/mL). **F.** Left: Competition experiments in *E. coli*, with indicated strains. Right: Relative OD 620 nm of indicated strain comparing growth in TOB (0.4  $\mu$ g/ml) divided by growth in the absence of treatment.



1680  
1681  
1682  
1683  
1684  
1685  
1686  
1687  
1688  
1689  
1690  
1691  
1692  
1693  
1694  
1695  
1696  
1697  
1698  
1699  
1700  
1701  
1702  
1703  
1704  
1705  
1706  
1707  
1708  
1709  
1710  
1711

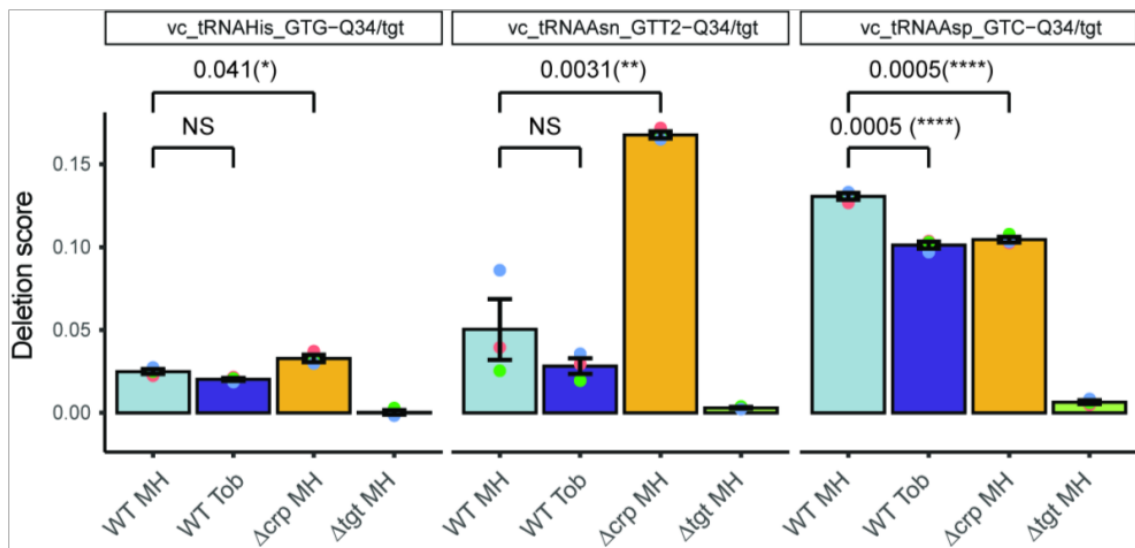

**Figure S5.** Q detection and quantification by IO<sub>4</sub><sup>-</sup> oxidation coupled to deep sequencing. The Y-axis represents deletion score, which correlates with the Q34 level in tRNA. Results for tRNAs His, AsnGUU2 and Asp are shown. Analysis was performed for three biological replicates (shown as colored dots) and at least two technical replicates for each strain (only mean of technical replicates is shown). p-values are calculated by two-tailed T-test, error bars correspond to standard error of the mean.

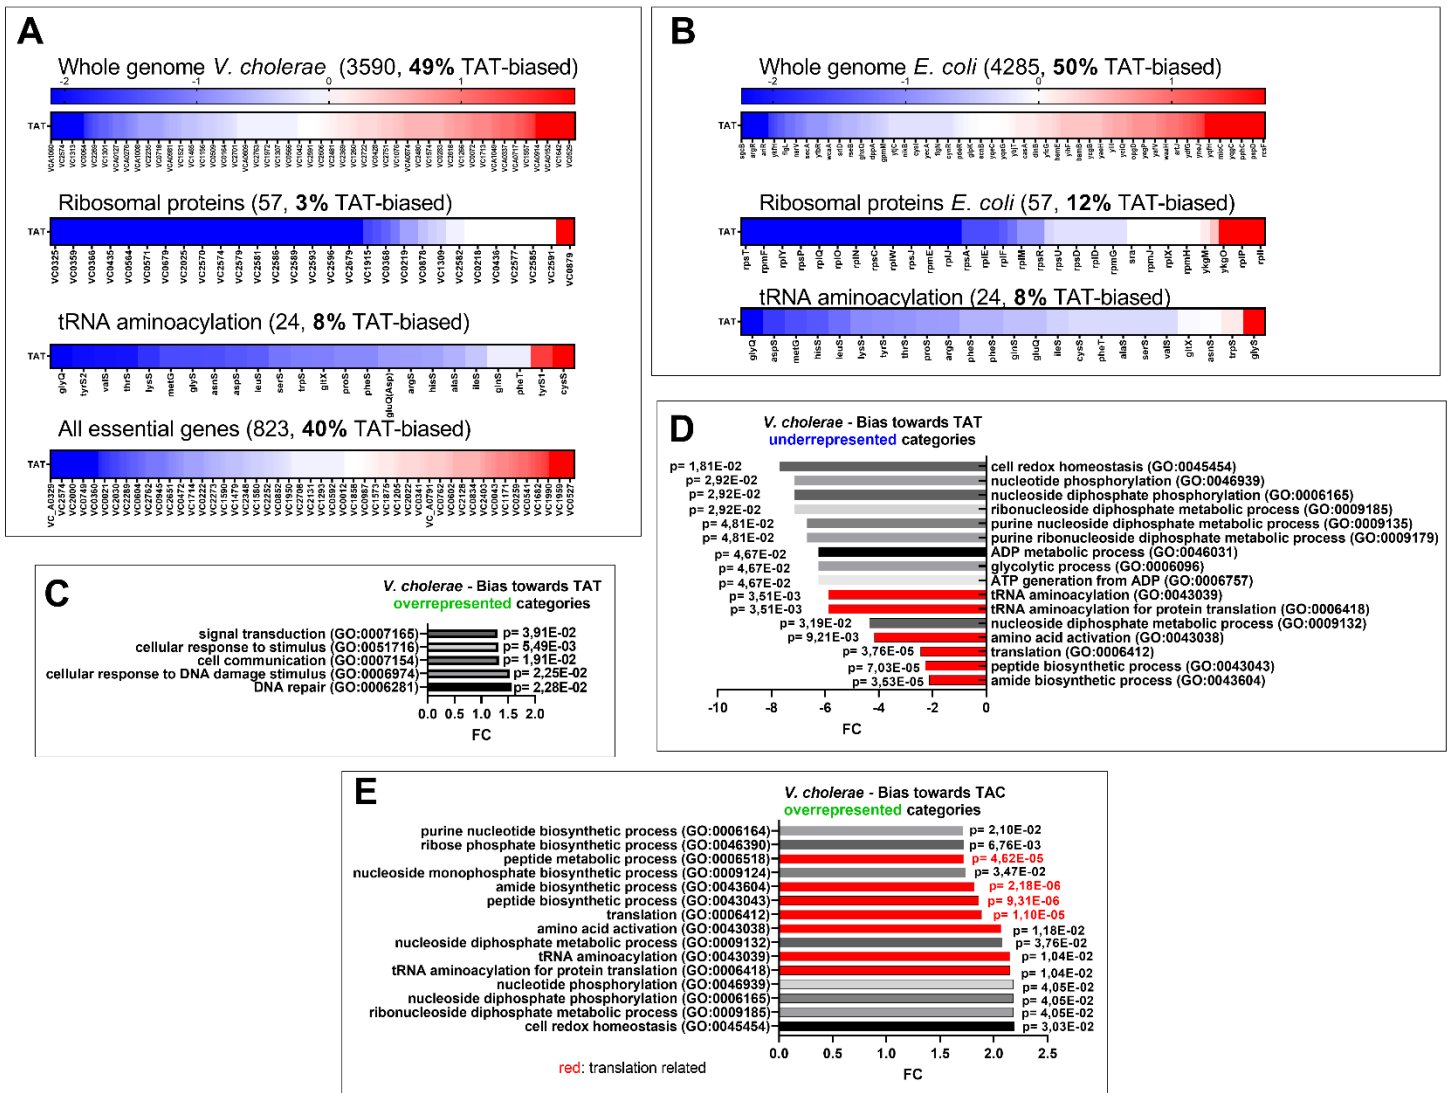

1730

1731

1732 **Figure S6. Codon usage.** A and B: Tyrosine codon usage in A: *V. cholerae* and B: *E. coli* in the whole

1733 genome and selected groups of genes. Red indicates positive codon usage bias, i.e. TAT bias. Blue

1734 indicates negative codon usage bias for TAT, i.e. TAC bias. CDE. Gene ontology enrichment analysis in

1735 *V. cholerae* of C: overrepresented gene categories with TAT usage bias. D: underrepresented gene

1736 categories with TAT usage bias. E: overrepresented gene categories with TAC usage bias.

1737

1738

1739

1740

1741

1742

1743

1744  
1745

**Table S1: Proteomics identify differentially abundant proteins**

| Uniprot                                   | Gene Name | Fasta headers                                                                |
|-------------------------------------------|-----------|------------------------------------------------------------------------------|
| <b>I - More abundant in WT</b>            |           |                                                                              |
| <b>I – 1. PresentF606WT_AbsentJ420tgt</b> |           |                                                                              |
| Q9KTY9                                    | tgt       | Queueine tRNA-ribosyltransferase                                             |
| Q9KNM6                                    | VC_2706   | queuosine precursor transporter                                              |
| Q9KNH8                                    | VC_2761   | Bcr/CflA family efflux transporter                                           |
| Q9KMV7                                    | VC_A0211  | Sensory box sensor histidine kinase                                          |
| Q9KN55                                    | VC_A0110  | Uncharacterized protein                                                      |
| Q9KP41                                    | VC_2538   | Thiamine ABC transporter, permease protein,                                  |
| Q9KTU0                                    | VC_0798   | Citrate lyase, beta subunit                                                  |
| Q9KSB8                                    | VC_1340   | PrpE protein                                                                 |
| Q9KRW0                                    | VC_1524   | ABC transporter, permease protein                                            |
| Q9KMB6                                    | VC_A0457  | Uncharacterized protein                                                      |
| Q9KUU0                                    | VC_0425   | lacZ                                                                         |
| Q9KND5                                    | VC_A0030  | Uncharacterized protein                                                      |
| Q9KNP5                                    | zapB      | Cell division protein ZapB                                                   |
| Q9KUS6                                    | VC_0439   | ThrE_2 domain-containing protein                                             |
| Q9KLN9                                    | VC_A0734  | Uncharacterized protein                                                      |
| Q9KRP8                                    | VC_1588   | Transcriptional regulator, LysR family                                       |
| Q9KRB9                                    | VC_1723   | TVP38/TMEM64 family membrane protein                                         |
| Q9KNT7                                    | argB      | Acetylglutamate kinase                                                       |
| Q9KRX3                                    | VC_1510   | Uncharacterized protein                                                      |
| Q9KPM7                                    | VC_2340   | HD-GYP domain-containing protein                                             |
| Q9KLN36                                   | VC_A0913  | Hemin ABC transporter, periplasmic hemin-binding protein HutB                |
| Q9KVY3                                    | VC_0005   | Putative membrane protein insertion efficiency factor                        |
| Q9KQV1                                    | VC_1897   | Hit family protein                                                           |
| Q9KMY2                                    | VC_A0184  | cspE Cold shock DNA-binding domain protein                                   |
| Q9KLN45                                   | VC_A0903  | Uncharacterized protein glycertae kinase                                     |
| Q9KRM7                                    | VC_1609   | Uncharacterized protein ABC-2 type transport system permease                 |
| Q9KSC1                                    | VC_1337   | Citrate synthase                                                             |
| Q9KLN9                                    | VC_A0807  | ABC transporter, periplasmic substrate-binding protein                       |
| Q9KT63                                    | VC_1042   | Long-chain fatty acid transport protein                                      |
| Q9KN12                                    | VC_A0154  | Uncharacterized protein Na <sup>+</sup> :H <sup>+</sup> antiporter subunit E |
| Q9KN05                                    | tnaA      | Tryptophanase                                                                |
| Q9KS94                                    | queE      | 7-carboxy-7-deazaguanine synthase                                            |
| Q9KQI2                                    | tmk       | Thymidylate kinase                                                           |
| Q9KVP6                                    | ubiC      | Probable chorismate pyruvate-lyase                                           |
| Q9KMP2                                    | VC_A0281  | Integrase                                                                    |
| Q9KUW3                                    | VC_0396   | Transcriptional regulator, LuxR family                                       |
| Q9KUK3                                    | VC_0515   | Uncharacterized protein                                                      |
| Q9KSC8                                    | VC_1330   | Uncharacterized protein                                                      |
| Q9KUQ7                                    | VC_0458   | UPF0235 protein yggU                                                         |

| <b>I – 2. MoreF606wt_ThanJ420tgt</b>       |          |                                                                       | <b>log2FC<br/>WT/tgt</b> | <b>p value</b> | <b>Adjusted<br/>p value</b> |
|--------------------------------------------|----------|-----------------------------------------------------------------------|--------------------------|----------------|-----------------------------|
| Q9KTJ4                                     | gmhB     | D-glycero-beta-D-manno-heptose-1,7-bisphosphate 7-phosphatase         | 3,51                     | 0,0001         | 0,0005                      |
| Q9KTU3                                     | VC_0795  | Citrate/sodium symporter                                              | 3,46                     | 0,0085         | 0,0068                      |
| Q9KSB4                                     | VC_1345  | Putative dioxygenase                                                  | 3,35                     | 0,0024         | 0,0034                      |
| Q9KS61                                     | cheR2    | Chemotaxis protein methyltransferase                                  | 2,93                     | 0,0053         | 0,0050                      |
| Q9KN74                                     | VC_A0091 | UPF0251 protein VC_A0091                                              | 2,86                     | 0,0013         | 0,0025                      |
| Q9KR81                                     | VC_1762  | EH_Signature domain-containing protein                                | 2,54                     | 0,0023         | 0,0034                      |
| Q9KM90                                     | VC_A0491 | Uncharacterized protein                                               | 2,26                     | 0,0013         | 0,0025                      |
| Q9KQ10                                     | VC_2197  | Flagellar hook protein FlgE                                           | 2,23                     | 0,0036         | 0,0042                      |
| Q9KVI7                                     | murl     | Glutamate racemase                                                    | 2,11                     | 0,0015         | 0,0028                      |
| Q9KV46                                     | VC_0312  | NAD(P)H-flavin reductase                                              | 2,10                     | 0,0004         | 0,0014                      |
| Q9KL60                                     | VC_A0888 | Transcriptional regulator malT , LuxR family                          | 2,01                     | 0,0038         | 0,0042                      |
| Q9KSV5                                     | VC_1151  | Uncharacterized protein lysO                                          | 1,85                     | 0,0003         | 0,0012                      |
| Q9KUR5                                     | VC_0450  | Membrane-bound lytic murein transglycosylase C                        | 1,81                     | 0,0057         | 0,0052                      |
| Q9KVM8                                     | VC_0113  | ubiG? Methyltransferase-related protein                               | 1,76                     | 0,0047         | 0,0046                      |
| Q9KPC7                                     | VC_2445  | gspA General secretion pathway protein A                              | 1,75                     | 0,0039         | 0,0042                      |
| Q9KNL2                                     | nfuA     | Fe/S biogenesis protein NfuA                                          | 1,68                     | 0,0010         | 0,0022                      |
| Q9KVI5                                     | VC_0161  | Transcriptional activator llvY                                        | 1,63                     | 0,0128         | 0,0090                      |
| Q9KL10                                     | VC_A0940 | Transcriptional regulator, DeoR family                                | 1,62                     | 0,0003         | 0,0012                      |
| Q9KR73                                     | VC_1770  | Uncharacterized protein                                               | 1,52                     | 0,0112         | 0,0082                      |
| Q9KKR5                                     | VC_A1037 | Amino acid ABC transporter, ATP-binding protein                       | 1,43                     | 0,0080         | 0,0065                      |
| H9L4R1                                     | VC_0412  | MshO Uncharacterized protein                                          | 1,43                     | 0,0094         | 0,0071                      |
| Q9KKN4                                     | VC_A1068 | LRP Transcriptional regulator, AsnC family                            | 1,43                     | 0,0061         | 0,0053                      |
| P45784                                     | epsN     | Type II secretion system protein N                                    | 1,38                     | 0,0022         | 0,0034                      |
| Q9KU51                                     | VC_0673  | Probable membrane transporter protein                                 | 1,37                     | 0,0076         | 0,0063                      |
| Q9KNR9                                     | VC_2662  | Uncharacterized protein                                               | 1,24                     | 0,0008         | 0,0019                      |
| Q9KRY1                                     | rsmF     | Ribosomal RNA small subunit methyltransferase F                       | 1,18                     | 0,0060         | 0,0053                      |
| Q9KLX1                                     | VC_A0620 | Thiosulfate sulfurtransferase SseA, putative                          | 1,10                     | 0,0020         | 0,0034                      |
| Q9KV88                                     | VC_0268  | ygaJ Uncharacterized protein                                          | 1,09                     | 0,0070         | 0,0060                      |
| Q9KPI7                                     | VC_2380  | Cobalamin biosynthesis protein CbiB, putative                         | 1,00                     | 0,0042         | 0,0042                      |
| <b>I – 3. PresentF606TOB_AbsentJ420TOB</b> |          |                                                                       |                          |                |                             |
| POC6D1                                     | irgB     | Iron-regulated virulence regulatory protein IrgB                      |                          |                |                             |
| POC6D6                                     | tcpN     | TCP pilus virulence regulatory protein                                |                          |                |                             |
| Q56632                                     | vibA     | Vibriobactin-specific 2,3-dihydro-2,3-dihydroxybenzoate dehydrogenase |                          |                |                             |
| Q9KKP3                                     | VC_A1059 | Putative pseudouridine methyltransferase                              |                          |                |                             |
| Q9KL40                                     | hutX     | Intracellular heme transport protein HutX                             |                          |                |                             |
| Q9KLG0                                     | fabV2    | Enoyl-[acyl-carrier-protein] reductase [NADH] 2                       |                          |                |                             |
| Q9KLJ6                                     | glpB     | Anaerobic glycerol-3-phosphate dehydrogenase subunit B                |                          |                |                             |
| Q9KLR1                                     | VC_A0681 | 33-cGAMP-specific phosphodiesterase 1                                 |                          |                |                             |
| Q9KMY6                                     | pepT     | Peptidase T                                                           |                          |                |                             |
| Q9KNL4                                     | bioH     | Pimeloyl-[acyl-carrier protein] methyl ester esterase                 |                          |                |                             |
| Q9KPE3                                     | coaE     | Dephospho-CoA kinase                                                  |                          |                |                             |
| Q9KRQ1                                     | VC_1585  | Catalase                                                              |                          |                |                             |

|        |          |                                                              |
|--------|----------|--------------------------------------------------------------|
| Q9KS61 | cheR2    | Chemotaxis protein methyltransferase 2                       |
| Q9KSB4 | VC_1345  | Putative dioxygenase                                         |
| Q9KSW7 | hisI     | Histidine biosynthesis bifunctional protein HisIE            |
| Q9KTY9 | tgt      | Queuine tRNA-ribosyltransferase                              |
| Q9KU27 | VC_0702  | Inosine/xanthosine triphosphatase                            |
| H9L4T3 | VC_2212  | Uncharacterized protein                                      |
| Q9K2M8 | VC_A0348 | Uncharacterized protein                                      |
| Q9KKK0 | VC_A1105 | DNA-binding response regulator                               |
| Q9KKX8 | VC_A0972 | MFS domain-containing protein                                |
| Q9KL71 | VC_A0876 | D-serine deaminase activator                                 |
| Q9KLB3 | VC_A0833 | Transcriptional regulator, LysR family                       |
| Q9KLG6 | VC_A0778 | AHS2 domain-containing protein                               |
| Q9KLK5 | VC_A0738 | Uncharacterized protein                                      |
| Q9KLK9 | VC_A0734 | Uncharacterized protein                                      |
| Q9KLQ1 | VC_A0691 | Acetoacetyl-CoA reductase                                    |
| Q9KM02 | VC_A0587 | PPC domain-containing protein                                |
| Q9KM77 | VC_A0511 | Anaerobic ribonucleoside-triphosphate reductase              |
| Q9KM86 | VC_A0496 | Glutathione S-transferase, putative                          |
| Q9KM98 | VC_A0483 | Uncharacterized protein                                      |
| Q9KMX3 | VC_A0193 | Na <sup>+</sup> /H <sup>+</sup> antiporter, putative         |
| Q9KN01 | VC_A0165 | GGDEF family protein                                         |
| Q9KN09 | VC_A0157 | NADH dehydrogenase, putative                                 |
| Q9KN25 | VC_A0141 | C4-dicarboxylate transport sensor protein, putative          |
| Q9KN46 | VC_A0119 | ImpA_N domain-containing protein                             |
| Q9KN85 | VC_A0080 | GGDEF family protein                                         |
| Q9KN89 | VC_A0076 | Gate domain-containing protein                               |
| Q9KN99 | VC_A0066 | Uncharacterized protein                                      |
| Q9KNA1 | VC_A0064 | TonB system receptor, putative                               |
| Q9KNA2 | VC_A0063 | Protease II                                                  |
| Q9KNB4 | VC_A0051 | Uncharacterized protein                                      |
| Q9KNE3 | VC_A0022 | Glutathione S-transferase-related protein                    |
| Q9KNF6 | VC_A0008 | Methyl-accepting chemotaxis protein                          |
| Q9KNM6 | VC_2706  | Probable queuosine precursor transporter                     |
| Q9KNN0 | VC_2702  | Transcriptional regulator, LuxR family                       |
| Q9KPD7 | cpdA     | 3,5-cyclic adenosine monophosphate phosphodiesterase<br>CpdA |
| Q9KPJ7 | VC_2370  | Sensory box/GGDEF family protein                             |
| Q9KPR2 | VC_2304  | Uncharacterized protein                                      |
| Q9KPY8 | VC_2224  | GGDEF family protein                                         |
| Q9KQ04 | VC_2203  | Flagellar protein, putative                                  |
| Q9KQ78 | fliP     | Flagellar biosynthetic protein FliP                          |
| Q9KQN1 | VC_1967  | Methyl-accepting chemotaxis protein                          |
| Q9KQQ9 | VC_1939  | Uncharacterized protein                                      |
| Q9KQW7 | VC_1880  | DUF2062 domain-containing protein                            |
| Q9KR48 | VC_1798  | Eha protein                                                  |
| Q9KRH6 | VC_1666  | VIBCH ABC transporter, ATP-binding protein, putative         |

|                                       |          |                                                                                      |                           |                |                             |
|---------------------------------------|----------|--------------------------------------------------------------------------------------|---------------------------|----------------|-----------------------------|
| Q9KRJ6                                | VC_1644  | Uncharacterized protein                                                              |                           |                |                             |
| Q9KRL9                                | VC_1617  | Transcriptional regulator, LysR family                                               |                           |                |                             |
| Q9KRN2                                | VC_1604  | Transcriptional regulatory protein                                                   |                           |                |                             |
| Q9KRW9                                | VC_1515  | Chaperone, formate dehydrogenase-specific, putative                                  |                           |                |                             |
| Q9KSC1                                | VC_1337  | Citrate synthase                                                                     |                           |                |                             |
| Q9KSC6                                | VC_1332  | Uncharacterized protein                                                              |                           |                |                             |
| Q9KSC9                                | VC_1329  | Opacity protein-related protein                                                      |                           |                |                             |
| Q9KSE2                                | VC_1315  | Sensor histidine kinase                                                              |                           |                |                             |
| Q9KSP0                                | VC_1216  | GGDEF family protein                                                                 |                           |                |                             |
| Q9KSV5                                | VC_1151  | Uncharacterized protein                                                              |                           |                |                             |
| Q9KT20                                | VC_1085  | Sensor histidine kinase                                                              |                           |                |                             |
| Q9KT74                                | VC_1031  | Inosine monophosphate dehydrogenase-related protein                                  |                           |                |                             |
| Q9KTC3                                | VC_0979  | Oxidoreductase, short-chain dehydrogenase/reductase family                           |                           |                |                             |
| Q9KTI4                                | VC_0918  | UDP-N-acetyl-D-mannosaminuronic acid dehydrogenase                                   |                           |                |                             |
| Q9KTV0                                | VC_0787  | Transcriptional regulator, LysR family                                               |                           |                |                             |
| Q9KU51                                | VC_0673  | Probable membrane transporter protein                                                |                           |                |                             |
| Q9KUQ1                                | VC_0464  | Transcriptional regulator, LuxR family                                               |                           |                |                             |
| Q9KUW6                                | VC_0393  | Uncharacterized protein                                                              |                           |                |                             |
| Q9KV54                                | VC_0303  | Sensor histidine kinase                                                              |                           |                |                             |
| Q9KVM2                                | VC_0119  | Uroporphyrinogen-III synthase                                                        |                           |                |                             |
| Q9KVM8                                | VC_0113  | Methyltransferase-related protein                                                    |                           |                |                             |
| Q9KVP4                                | VC_0097  | Flagellar protein FliL                                                               |                           |                |                             |
| Q9KVS6                                | VC_0063  | ThiF protein                                                                         |                           |                |                             |
| <b>I – 4. MoreF606TOB_ThanJ420TOB</b> |          |                                                                                      | <b>log2 FC<br/>WT/tgt</b> | <b>p value</b> | <b>Adjusted<br/>p value</b> |
| Q9KMV8                                | VC_A0210 | 33-cGAMP-specific phosphodiesterase 2                                                | 5,21                      | 0,00000        | 0,00005                     |
| Q9KSR2                                | VC_1194  | J domain-containing protein                                                          | 3,68                      | 0,00929        | 0,00488                     |
| Q9KKY6                                | VC_A0964 | Glycine cleavage operon activator, putative                                          | 5,30                      | 0,00002        | 0,00043                     |
| Q9KKL6                                | VC_A1087 | Anti-sigma F factor antagonist, putative                                             | 3,72                      | 0,00060        | 0,00202                     |
| Q9KSK7                                | VC_1249  | ACT domain-containing protein                                                        | 2,37                      | 0,00973        | 0,00488                     |
| Q9KS89                                | VC_1370  | GGDEF family protein                                                                 | 3,51                      | 0,00007        | 0,00062                     |
| Q9KNA0                                | VC_A0065 | P/Homo B domain-containing protein                                                   | 3,48                      | 0,00876        | 0,00488                     |
| Q9KT21                                | VC_1084  | Sensory box sensor histidine kinase                                                  | 1,77                      | 0,00183        | 0,00235                     |
| Q9KRA1                                | VC_1741  | Transcriptional regulator, TetR family                                               | 1,71                      | 0,01423        | 0,00606                     |
| Q9KU00                                | cutC     | Copper homeostasis protein CutC                                                      | 1,85                      | 0,01810        | 0,00696                     |
| Q9KTH7                                | VC_0925  | Polysaccharide biosynthesis protein, putative                                        | 3,09                      | 0,00236        | 0,00256                     |
| Q9KSD3                                | VC_1325  | Galactoside ABC transporter, periplasmic D-galactose/D-glucose-binding protein SV=1" | 1,77                      | 0,02018        | 0,00745                     |
| Q9KUU2                                | arcA     | ARCA_VIBCH Arginine deiminase                                                        | 2,78                      | 0,00191        | 0,00235                     |
| Q9KLB8                                | phhA     | PH4H_VIBCH Phenylalanine-4-hydroxylase                                               | 2,16                      | 0,03098        | 0,00967                     |
| Q9KPI7                                | VC_2380  | Cobalamin biosynthesis protein CbiB, putative                                        | 1,83                      | 0,00973        | 0,00488                     |
| Q9KSE3                                | VC_1314  | Transporter, putative                                                                | 2,64                      | 0,02472        | 0,00834                     |
| Q9KQX3                                | VC_1874  | Uncharacterized protein                                                              | 2,66                      | 0,00403        | 0,00309                     |
| Q9KMJ2                                | VC_A0356 | Uncharacterized protein                                                              | 2,60                      | 0,00439        | 0,00321                     |
| Q9KRW3                                | VC_1521  | Sensor histidine kinase                                                              | 2,69                      | 0,00011        | 0,00085                     |

|        |          |                                                              |      |         |         |
|--------|----------|--------------------------------------------------------------|------|---------|---------|
| Q9KN34 | rbsK     | Ribokinase                                                   | 2,49 | 0,00270 | 0,00269 |
| Q9KQX5 | VC_1872  | AAA_PrkA domain-containing protein                           | 2,94 | 0,00216 | 0,00245 |
| Q9KS12 | rtxA     | Multifunctional-autoprocessing repeats-in-toxin              | 3,68 | 0,01920 | 0,00716 |
| Q9KQ01 | VC_2206  | Uncharacterized protein                                      | 2,76 | 0,00003 | 0,00043 |
| P45774 | epsH     | Type II secretion system protein H                           | 2,58 | 0,02202 | 0,00772 |
| Q9KU02 | VC_0728  | PPK2 domain-containing protein                               | 3,08 | 0,01270 | 0,00574 |
| Q9KKL7 | VC_A1086 | Response regulator                                           | 2,65 | 0,02350 | 0,00806 |
| Q9KSG5 | VC_1291  | Uncharacterized protein                                      | 3,38 | 0,00096 | 0,00223 |
| Q9KSV0 | VC_1156  | Sensor histidine kinase                                      | 2,48 | 0,00113 | 0,00224 |
| Q9KN48 | VC_A0117 | Sigma-54 dependent transcriptional regulator                 | 1,56 | 0,00974 | 0,00488 |
| Q9KRG0 | VC_1682  | Peptide ABC transporter, permease protein                    | 2,56 | 0,00020 | 0,00109 |
| Q9KRG1 | VC_1681  | Peptide ABC transporter, permease protein                    | 2,86 | 0,00015 | 0,00099 |
| Q9KSD1 | mgIA     | Galactose/methyl galactoside import ATP-binding protein MglA | 2,08 | 0,02068 | 0,00754 |
| Q9KLT8 | VC_A0653 | PTS system, sucrose-specific IIBC component                  | 2,43 | 0,00003 | 0,00043 |
| POC6Q8 | dam      | DNA adenine methylase                                        | 2,26 | 0,00448 | 0,00324 |
| POC6D3 | vibB     | Vibriobactin-specific isochorismatase                        | 2,32 | 0,00194 | 0,00235 |
| Q9KLF1 | VC_A0795 | Resolvase, putative                                          | 2,33 | 0,00078 | 0,00215 |
| Q9KNN7 | VC_2694  | Superoxide dismutase                                         | 1,34 | 0,00647 | 0,00419 |
| Q9KNW3 | VC_2617  | Arginine N-succinyltransferase OS=Vibrio cholerae serotype   | 1,27 | 0,02884 | 0,00915 |
| Q9KUA1 | VC_0622  | Histidine kinase                                             | 1,89 | 0,00950 | 0,00488 |
| Q9KQX9 | VC_1868  | Methyl-accepting chemotaxis protein                          | 2,27 | 0,01417 | 0,00606 |
| Q9KS63 | VC_1397  | Chemotaxis protein CheA                                      | 2,42 | 0,02557 | 0,00852 |
| Q9KR16 | VC_1831  | Sensor histidine kinase                                      | 2,54 | 0,00188 | 0,00235 |
| Q9KKR5 | VC_A1037 | Amino acid ABC transporter, ATP-binding protein              | 1,56 | 0,02096 | 0,00754 |
| Q9KPK6 | grcA     | GRCA_VIBCH Autonomous glycyI radical cofactor                | 2,66 | 0,00332 | 0,00269 |
| Q9KQX4 | VC_1873  | UPF0229 protein VC_1873                                      | 2,70 | 0,02180 | 0,00770 |
| Q9KTI9 | VC_0913  | HlyD_D23 domain-containing protein                           | 1,71 | 0,02570 | 0,00852 |
| Q9KTC7 | VC_0975  | NfeD domain-containing protein                               | 2,07 | 0,00048 | 0,00177 |
| Q9KU65 | VC_0658  | C-di-GMP phosphodiesterase A-related protein                 | 2,14 | 0,00930 | 0,00488 |
| Q9KNB6 | VC_A0049 | GGDEF family protein                                         | 2,45 | 0,00175 | 0,00235 |
| Q9KNY0 | VC_2600  | Uncharacterized protein                                      | 1,81 | 0,00123 | 0,00224 |
| Q9KTF2 | mrda     | Peptidoglycan D,D-transpeptidase MrdA                        | 1,65 | 0,01002 | 0,00488 |
| Q9KQY2 | VC_1865  | Uncharacterized protein                                      | 1,78 | 0,00316 | 0,00269 |
| Q9KL39 | VC_A0909 | Oxygen-independent coproporphyrinogen III oxidase, putative  | 2,04 | 0,01389 | 0,00602 |
| Q9KVF6 | VC_0190  | DNA helicase uvrD                                            | 1,94 | 0,01686 | 0,00663 |
| Q9KUM9 | VC_0486  | Transcriptional regulator, DeoR family                       | 1,92 | 0,03066 | 0,00961 |
| Q9KRI2 | VC_1659  | Uncharacterized protein                                      | 2,10 | 0,01469 | 0,00612 |
| Q9KNJ0 | VC_2748  | Nitrogen regulation protein                                  | 1,87 | 0,00126 | 0,00224 |
| Q9KP22 | VC_2557  | Uncharacterized protein OS                                   | 1,81 | 0,00291 | 0,00269 |
| Q9KRV1 | VC_1533  | DTW domain-containing protein                                | 1,83 | 0,00205 | 0,00235 |
| Q9KQC8 | VC_2072  | Peptidase, insulinase family                                 | 1,58 | 0,00893 | 0,00488 |
| Q9KUM3 | VC_0492  | Uncharacterized protein                                      | 2,34 | 0,00243 | 0,00259 |
| Q9KQI3 | VC_2015  | DNA polymerase III, delta prime subunit                      | 1,77 | 0,00063 | 0,00202 |
| Q9KPT7 | crl      | Sigma factor-binding protein Crl                             | 1,58 | 0,00088 | 0,00219 |

|        |          |                                                                     |      |         |         |
|--------|----------|---------------------------------------------------------------------|------|---------|---------|
| Q9KS69 | VC_1390  | Transcriptional regulator, LysR family                              | 1,89 | 0,00007 | 0,00062 |
| Q9KSC3 | VC_1335  | Transcriptional regulator, GntR family                              | 1,55 | 0,00321 | 0,00269 |
| Q9KRL1 | VC_1629  | Uncharacterized protein                                             | 1,89 | 0,00322 | 0,00269 |
| Q9KLS5 | VC_A0666 | L-serine dehydratase                                                | 1,71 | 0,00079 | 0,00215 |
| Q9KM52 | VC_A0537 | Uncharacterized protein                                             | 1,27 | 0,01088 | 0,00511 |
| Q9KRI6 | VC_1655  | Magnesium transporter MgtE                                          | 1,72 | 0,00363 | 0,00282 |
| Q9KTJ1 | VC_0911  | Trehalose-6-phosphate hydrolase                                     | 1,70 | 0,00042 | 0,00166 |
| Q9KPZ9 | VC_2208  | Uncharacterized protein                                             | 1,79 | 0,01534 | 0,00629 |
| Q9KM32 | VC_A0557 | GGDEF family protein                                                | 1,37 | 0,02135 | 0,00762 |
| Q9KSA6 | VC_1353  | GGDEF family protein                                                | 1,52 | 0,00156 | 0,00231 |
| Q9KUC2 | VC_0600  | AB hydrolase-1 domain-containing protein                            | 1,72 | 0,00123 | 0,00224 |
| Q9KM15 | VC_A0574 | N-acetyltransferase domain-containing protein                       | 1,39 | 0,01767 | 0,00683 |
| Q9KS83 | VC_1376  | GGDEF family protein                                                | 1,51 | 0,00363 | 0,00282 |
| Q9KPT2 | VC_2280  | Uncharacterized protein                                             | 1,45 | 0,00471 | 0,00331 |
| Q9KVN8 | VC_0103  | Uncharacterized protein                                             | 1,55 | 0,00249 | 0,00262 |
| Q9KT24 | VC_1081  | Response regulator                                                  | 1,65 | 0,02632 | 0,00861 |
| Q9KRJ1 | VC_1649  | Trypsin, putative                                                   | 1,54 | 0,00092 | 0,00220 |
| Q9KLP6 | VC_A0697 | Sensory box/GGDEF family protein                                    | 1,63 | 0,00022 | 0,00109 |
| Q9KQ23 | ispE     | ISPE_VIBCH 4-diphosphocytidyl-2-C-methyl-D-erythritol kinase ispE   | 1,57 | 0,00119 | 0,00224 |
| H9L4T1 | VC_A0450 | Uncharacterized protein                                             | 1,76 | 0,00290 | 0,00269 |
| Q9KU16 | VC_0714  | Uncharacterized protein                                             | 1,60 | 0,02409 | 0,00820 |
| Q9KRS6 | katG     | KATG_VIBCH Catalase-peroxidase katG                                 | 1,39 | 0,01256 | 0,00571 |
| P29485 | tcpP     | Toxin coregulated pilus biosynthesis protein P tcpP                 | 1,56 | 0,00124 | 0,00224 |
| Q9KU53 | rppH     | RPPH_VIBCH RNA pyrophosphohydrolase rppH                            | 2,03 | 0,00467 | 0,00331 |
| Q9KKX3 | VC_A0977 | ABC transporter, ATP-binding protein                                | 1,84 | 0,02092 | 0,00754 |
| Q9KQL5 | VC_1983  | Peptidase, putative                                                 | 2,47 | 0,02205 | 0,00772 |
| Q9KSG0 | VC_1296  | Phosphomethylpyrimidine kinase                                      | 3,54 | 0,00005 | 0,00054 |
| Q9KPJ4 | VC_2373  | Glutamate synthase, large subunit                                   | 1,53 | 0,00120 | 0,00224 |
| Q9KS96 | VC_1363  | Siroheme synthase component enzyme                                  | 1,31 | 0,00930 | 0,00488 |
| Q9KP89 | VC_2484  | Long-chain-fatty-acid--CoA ligase, putative                         | 1,53 | 0,00535 | 0,00367 |
| Q9KSM2 | VC_1234  | Exodeoxyribonuclease I                                              | 1,59 | 0,02087 | 0,00754 |
| Q9KSX5 | VC_1131  | Na <sub>+</sub> H <sup>+</sup> antiporter domain-containing protein | 2,07 | 0,01089 | 0,00511 |
| Q9KTJ2 | VC_0910  | PTS system, trehalose-specific IIBC component                       | 1,33 | 0,00205 | 0,00235 |
| Q9KKZ7 | VC_A0953 | Peptidyl-prolyl cis-trans isomerase C                               | 1,30 | 0,00997 | 0,00488 |
| Q9KUU7 | VC_0418  | dTTP/UTP pyrophosphatase                                            | 1,24 | 0,00258 | 0,00267 |
| Q9KV39 | birA     | Bifunctional ligase/repressor BirA                                  | 1,47 | 0,00649 | 0,00419 |
| Q9KS28 | VC_1433  | Uncharacterized protein                                             | 1,23 | 0,00965 | 0,00488 |
| Q9KMM4 | VC_A0307 | HNHc domain-containing protein                                      | 1,46 | 0,00110 | 0,00224 |
| Q9KUJ8 | VC_0522  | Beta-ketoadipate enol-lactone hydrolase, putative                   | 1,37 | 0,00202 | 0,00235 |
| Q9KVT7 | purE     | N5-carboxyaminoimidazole ribonucleotide mutase                      | 1,45 | 0,00886 | 0,00488 |
| Q9KRU5 | VC_1539  | Probable ketoamine kinase VC_1539                                   | 1,09 | 0,01619 | 0,00652 |
| Q9KSU7 | serC     | Phosphoserine aminotransferase                                      | 1,41 | 0,00147 | 0,00231 |
| Q9KQU2 | VC_1906  | Methyltransferase domain-containing protein                         | 2,00 | 0,00065 | 0,00202 |
| Q9KRW4 | VC_1520  | ABC transporter, ATP-binding protein                                | 1,17 | 0,00887 | 0,00488 |
| Q9KU52 | VC_0672  | Phosphoenolpyruvate-protein phosphotransferase                      | 1,41 | 0,00145 | 0,00231 |
| Q9KLI6 | VC_A0758 | Arginine ABC transporter, permease protein                          | 1,24 | 0,01152 | 0,00534 |



|        |          |                                                                  |      |         |         |
|--------|----------|------------------------------------------------------------------|------|---------|---------|
| Q9KPQ9 | panE     | 2-dehydropantoate 2-reductase                                    | 1,32 | 0,02013 | 0,00745 |
| Q9KNW7 | VC_2613  | Phosphoribulokinase                                              | 1,22 | 0,00346 | 0,00278 |
| Q9KT18 | VC_1087  | Response regulator                                               | 1,12 | 0,00908 | 0,00488 |
| Q9KPP6 | recB     | RecBCD enzyme subunit RecB                                       | 1,24 | 0,00085 | 0,00218 |
| Q9KQK1 | VC_1997  | Uncharacterized protein                                          | 1,16 | 0,00200 | 0,00235 |
| Q9KUN3 | argP     | ARGP_VIBCH HTH-type transcriptional regulator ArgP               | 1,53 | 0,00885 | 0,00488 |
| Q9KMW8 | VC_A0198 | Site-specific DNA-methyltransferase, putative                    | 1,15 | 0,00300 | 0,00269 |
| Q9KVB8 | VC_0228  | Uncharacterized protein                                          | 1,27 | 0,00223 | 0,00248 |
| Q9KVE7 | VC_0199  | Hemolysin secretion ATP-binding protein, putative                | 1,29 | 0,00999 | 0,00488 |
| Q9KQM5 | menB     | 1,4-dihydroxy-2-naphthoyl-CoA synthase menB                      | 1,40 | 0,00328 | 0,00269 |
| Q9KR89 | VC_1753  | Paraquat-inducible protein A                                     | 1,11 | 0,00739 | 0,00467 |
| Q9KQJ7 | VC_2001  | Putative glucose-6-phosphate 1-epimerase                         | 1,57 | 0,01040 | 0,00501 |
| P57070 | lolB     | Outer-membrane lipoprotein LolB                                  | 1,04 | 0,01285 | 0,00577 |
| Q9KL63 | VC_A0884 | Uncharacterized protein                                          | 1,15 | 0,02695 | 0,00863 |
| H9L4P1 | VC_0259  | Lipopolysaccharide biosynthesis protein RfbV                     | 1,21 | 0,00560 | 0,00377 |
| Q9KMU4 | VC_A0225 | Glutamine amidotransferase type-2 domain-containing protein      | 1,14 | 0,00164 | 0,00235 |
| Q9KKU5 | VC_A1005 | Transcriptional regulator, MarR family                           | 1,14 | 0,02484 | 0,00834 |
| Q9KVK1 | VC_0142  | DUF4145 domain-containing protein                                | 1,20 | 0,01451 | 0,00609 |
| Q9KVB5 | VC_0231  | Uncharacterized protein                                          | 1,09 | 0,00932 | 0,00488 |
| Q9KKS4 | VC_A1026 | Uncharacterized protein                                          | 1,31 | 0,00883 | 0,00488 |
| Q9KUU0 | VC_0425  | Uncharacterized protein                                          | 1,54 | 0,01872 | 0,00702 |
| Q9KTA5 | VC_0998  | Uncharacterized protein                                          | 1,15 | 0,00530 | 0,00367 |
| Q9KNC4 | gltS     | Sodium/glutamate symporter                                       | 1,21 | 0,02667 | 0,00862 |
| Q9KRS8 | VC_1558  | 6-phospho-beta-glucosidase                                       | 1,37 | 0,00196 | 0,00235 |
| Q9KMT9 | VC_A0230 | Iron(III) ABC transporter, ATP-binding protein                   | 1,08 | 0,01196 | 0,00547 |
| Q9KPZ0 | VC_2222  | Smr domain-containing protein                                    | 1,04 | 0,02562 | 0,00852 |
| Q9KQE2 | VC_2058  | Uncharacterized protein                                          | 1,05 | 0,00651 | 0,00419 |
| P57066 | lolD     | LOLD_VIBCH Lipoprotein-releasing system ATP-binding protein LolD | 1,01 | 0,00981 | 0,00488 |
| Q9KLE5 | VC_A0801 | Q9KLE5_VIBCH Inosine-guanosine kinase                            | 1,00 | 0,02622 | 0,00861 |
| Q9KS35 | VC_1426  | Spermidine/putrescine ABC transporter, permease protein          | 1,11 | 0,00158 | 0,00231 |
| Q9KSV4 | VC_1152  | HDOD domain-containing protein                                   | 1,07 | 0,00926 | 0,00488 |
| Q9KUM2 | VC_0493  | Q9KUM2_VIBCH Uncharacterized protein                             | 1,76 | 0,01375 | 0,00600 |
| Q9KNA9 | VC_A0056 | Q9KNA9_VIBCH Transcriptional regulator, MerR family              | 1,07 | 0,01454 | 0,00609 |
| Q9KQ71 | VC_2130  | Flagellum-specific ATP synthase FliI                             | 1,15 | 0,00357 | 0,00282 |
| Q9KLD8 | VC_A0808 | NodN-related protein                                             | 1,27 | 0,00802 | 0,00488 |
| Q9KP78 | VC_2497  | HD-GYP domain-containing protein                                 | 1,09 | 0,00149 | 0,00231 |
| Q60153 | tcpA     | TCPA_VIBCH Toxin coregulated pilin                               | 1,01 | 0,02653 | 0,00862 |
| Q9KRU1 | VC_1543  | Uncharacterized protein                                          | 1,09 | 0,00268 | 0,00269 |
| Q9KQ38 | VC_2166  | Trp repressor-binding protein                                    | 1,46 | 0,01086 | 0,00511 |
| Q9KQN3 | VC_1965  | TetR_C_33 domain-containing protein                              | 1,28 | 0,00698 | 0,00445 |
| Q9KN86 | VC_A0079 | Uncharacterized protein                                          | 1,23 | 0,00556 | 0,00377 |
| Q9KRD3 | VC_1709  | Zinc protease, insulinase family                                 | 1,25 | 0,00993 | 0,00488 |
| Q9KKS7 | VC_A1023 | Uncharacterized protein                                          | 1,16 | 0,00537 | 0,00367 |

|        |          |                                                              |      |         |         |
|--------|----------|--------------------------------------------------------------|------|---------|---------|
| Q9KVB7 | VC_0229  | Uncharacterized protein                                      | 1,66 | 0,01838 | 0,00696 |
| Q9KNR2 | VC_2669  | 5-carboxymethyl-2-hydroxyruconate delta isomerase, putative  | 1,22 | 0,01524 | 0,00628 |
| Q9KUI6 | mutS     | MUTS_VIBCH DNA mismatch repair protein MutS                  | 1,07 | 0,00298 | 0,00269 |
| Q9KVF0 | VC_0196  | ATP-dependent DNA helicase RecQ                              | 1,04 | 0,00303 | 0,00269 |
| Q9KTJ3 | VC_0909  | Trehalose operon repressor                                   | 1,03 | 0,00981 | 0,00488 |
| Q9KVH1 | VC_0175  | Deoxycytidylate deaminase-related protein                    | 1,28 | 0,01307 | 0,00584 |
| Q9KR77 | VC_1766  | Uncharacterized protein                                      | 1,01 | 0,01408 | 0,00606 |
| Q9KTL4 | truC     | tRNA pseudouridine synthase C truC                           | 1,09 | 0,00416 | 0,00310 |
| Q9KUM4 | VC_0491  | Uncharacterized protein                                      | 1,10 | 0,00571 | 0,00379 |
| P52022 | dnaE     | DNA polymerase III subunit alpha                             | 1,07 | 0,00324 | 0,00269 |
| Q9KP97 | VC_2476  | UPF0149 protein VC_2476                                      | 1,70 | 0,02715 | 0,00865 |
| Q9KS92 | VC_1367  | GGDEF family protein                                         | 1,19 | 0,00957 | 0,00488 |
| Q9KU08 | ppx      | Exopolyphosphatase ppx                                       | 1,04 | 0,01694 | 0,00663 |
| Q9KSI6 | VC_1270  | Glyoxylase II family protein                                 | 1,32 | 0,01645 | 0,00653 |
| Q9KRA6 | bpt      | Aspartate/glutamate leucyltransferase bpt                    | 1,04 | 0,01838 | 0,00696 |
| Q9KQF5 | topB     | DNA topoisomerase 3 topB                                     | 1,05 | 0,02938 | 0,00928 |
| Q9KNF3 | malT     | HTH-type transcriptional regulator MalT                      | 1,10 | 0,00227 | 0,00249 |
| Q9KPE8 | VC_2420  | Flavodoxin                                                   | 1,39 | 0,00897 | 0,00488 |
| Q9KNT4 | ppc      | Phosphoenolpyruvate carboxylase ppc                          | 1,05 | 0,00302 | 0,00269 |
| Q9KU29 | VC_0700  | Soluble lytic murein transglycosylase                        | 1,07 | 0,00291 | 0,00269 |
| Q9KQV0 | VC_1898  | Methyl-accepting chemotaxis protein                          | 1,01 | 0,00574 | 0,00379 |
| Q9KPE7 | VC_2421  | ampD protein                                                 | 1,04 | 0,02430 | 0,00824 |
| Q9KU20 | rldD     | Ribosomal large subunit pseudouridine synthase D rldD        | 1,03 | 0,00290 | 0,00269 |
| Q9KNQ5 | VC_2676  | Cell division protein FtsN, putative                         | 1,20 | 0,01452 | 0,00609 |
| H9L4T5 | VC_0847  | Integrase, phage family                                      | 1,28 | 0,02687 | 0,00863 |
| Q9KQ28 | VC_2176  | UPF0162 protein VC_2176                                      | 1,04 | 0,00311 | 0,00269 |
| Q9KUC0 | mrcB     | PBPB_VIBCH Penicillin-binding protein 1B                     | 1,15 | 0,01050 | 0,00502 |
| Q9KPV6 | uppS     | UPPS_VIBCH Ditrans,polycis-undecaprenyl-diphosphate synthase | 1,03 | 0,00800 | 0,00488 |
| Q9KVU5 | rsmB     | RSMB_VIBCH Ribosomal RNA small subunit methyltransferase B   | 1,02 | 0,01178 | 0,00542 |
| Q9KMC3 | VC_A0441 | Uncharacterized protein                                      | 1,17 | 0,00930 | 0,00488 |
| Q9KVL9 | VC_0122  | Adenylate cyclase                                            | 1,23 | 0,02356 | 0,00806 |
| Q9KUW9 | metH     | Methionine synthase                                          | 1,28 | 0,02670 | 0,00862 |
| Q9KL09 | VC_A0941 | Acyl-CoA thioester hydrolase-related protein                 | 1,03 | 0,02584 | 0,00853 |
| Q9KMY4 | VC_A0182 | Sigma-54 dependent transcriptional regulator                 | 1,00 | 0,00859 | 0,00488 |
| Q9KQ13 | flgH     | Flagellar L-ring protein                                     | 1,06 | 0,01335 | 0,00593 |
| Q9KT38 | VC_1067  | GGDEF domain-containing protein                              | 1,04 | 0,02971 | 0,00935 |
| Q9KM78 | VC_A0510 | Uncharacterized protein                                      | 1,01 | 0,01640 | 0,00653 |
| POC6R0 | irgA     | IRGA_VIBCH Iron-regulated outer membrane virulence protein   | 1,03 | 0,02028 | 0,00745 |
| Q9KPD8 | VC_2432  | Uncharacterized protein                                      | 1,23 | 0,03115 | 0,00968 |
| Q9KVS4 | thiG     | THIG_VIBCH Thiazole synthase                                 | 1,50 | 0,03191 | 0,00983 |
| Q9KMG4 | higA-1   | Antitoxin HigA-1                                             | 1,30 | 0,01712 | 0,00665 |
| Q9KUY5 | VC_0373  | Uncharacterized protein                                      | 1,25 | 0,02357 | 0,00806 |
| Q9KMG8 | VC_A0388 | Uncharacterized protein                                      | 1,58 | 0,00081 | 0,00215 |

1746

| Uniprot                                             | Gene Name | Fasta headers                                                        |                    |                |                         |
|-----------------------------------------------------|-----------|----------------------------------------------------------------------|--------------------|----------------|-------------------------|
| <b>II - More abundant in <math>\Delta</math>tgt</b> |           |                                                                      |                    |                |                         |
| <b>II – 1. PresentJ420tgt_AbsentF606wt</b>          |           |                                                                      |                    |                |                         |
| Q34419                                              | rstR1     | Cryptic phage CTXphi transcriptional repressor RstR                  |                    |                |                         |
| Q9KN37                                              | rbsA      | Ribose import ATP-binding protein RbsA                               |                    |                |                         |
| Q9KT77                                              | moaE      | Molybdopterin synthase catalytic subunit                             |                    |                |                         |
| Q9KVG9                                              | vspR      | Transcriptional regulator VspR                                       |                    |                |                         |
| H9L4R3                                              | VC_A0444  | RelE protein                                                         |                    |                |                         |
| Q9KKW7                                              | VC_A0983  | L-lactate permease                                                   |                    |                |                         |
| Q9KL14                                              | VC_A0935  | Uncharacterized protein                                              |                    |                |                         |
| Q9KLD8                                              | VC_A0808  | NodN-related protein                                                 |                    |                |                         |
| Q9KLF6                                              | VC_A0788  | DnaJ-related protein                                                 |                    |                |                         |
| Q9KLJ2                                              | VC_A0752  | Thioredoxin 2                                                        |                    |                |                         |
| Q9KLV6                                              | VC_A0635  | Transcriptional regulator, LysR family                               |                    |                |                         |
| Q9KM02                                              | VC_A0587  | PPC domain-containing protein                                        |                    |                |                         |
| Q9KM27                                              | VC_A0562  | Uncharacterized protein                                              |                    |                |                         |
| Q9KMP9                                              | VC_A0271  | Uncharacterized protein                                              |                    |                |                         |
| Q9KNC6                                              | VC_A0039  | Uncharacterized protein                                              |                    |                |                         |
| Q9KNE3                                              | VC_A0022  | Glutathione S-transferase-related protein                            |                    |                |                         |
| Q9KNI2                                              | VC_2757   | Uncharacterized protein                                              |                    |                |                         |
| Q9KNM7                                              | VC_2705   | Sodium/solute symporter, putative                                    |                    |                |                         |
| Q9KPF0                                              | VC_2418   | Thiol:disulfide interchange protein                                  |                    |                |                         |
| Q9KQ76                                              | VC_2125   | Flagellar motor switch protein FlIN                                  |                    |                |                         |
| Q9KQG6                                              | VC_2032   | Uncharacterized protein                                              |                    |                |                         |
| Q9KQS3                                              | VC_1925   | C4-dicarboxylate transport sensor protein                            |                    |                |                         |
| Q9KR71                                              | VC_1772   | WYL domain-containing protein                                        |                    |                |                         |
| Q9KRG4                                              | VC_1678   | Phage shock protein A                                                |                    |                |                         |
| Q9KRH0                                              | VC_1672   | DNA-3-methyladenine glycosidase I                                    |                    |                |                         |
| Q9KRM1                                              | VC_1615   | Uncharacterized protein                                              |                    |                |                         |
| Q9KRR5                                              | VC_1571   | Quinol oxidase, subunit I                                            |                    |                |                         |
| Q9KSM4                                              | VC_1232   | Uncharacterized protein                                              |                    |                |                         |
| Q9KSN9                                              | VC_1217   | N-acetyltransferase domain-containing protein                        |                    |                |                         |
| Q9KTS9                                              | VC_0809   | SWIM-type domain-containing protein                                  |                    |                |                         |
| Q9KTV0                                              | VC_0787   | Transcriptional regulator, LysR family                               |                    |                |                         |
| Q9KUN2                                              | VC_0483   | Uncharacterized protein                                              |                    |                |                         |
| Q9KUW6                                              | VC_0393   | Uncharacterized protein                                              |                    |                |                         |
| Q9KVR9                                              | VC_0070   | Uncharacterized protein                                              |                    |                |                         |
| <b>II – 2. MoreJ420tgt_ThanF606wt</b>               |           |                                                                      |                    |                |                         |
|                                                     |           |                                                                      | <b>log2 wt/tgt</b> | <b>p value</b> | <b>Adjusted p value</b> |
| Q9KNX3                                              | kefG      | Glutathione-regulated potassium-efflux system ancillary protein KefG | -7,30              | 0,00001        | 0,00036                 |
| Q9KLB8                                              | phhA      | Phenylalanine-4-hydroxylase                                          | -4,14              | 0,00010        | 0,00068                 |
| P09545                                              | hlyA      | Hemolysin                                                            | -3,90              | 0,00039        | 0,00140                 |

|                                           |          |                                                                              |       |         |         |
|-------------------------------------------|----------|------------------------------------------------------------------------------|-------|---------|---------|
| Q9KQN1                                    | VC_1967  | Methyl-accepting chemotaxis protein                                          | -3,84 | 0,00567 | 0,00521 |
| Q9KV16                                    | queG     | Epoxyqueuosine reductase                                                     | -3,39 | 0,00416 | 0,00420 |
| H9L4T3                                    | VC_2212  | Uncharacterized protein - putative Fe <sup>3+</sup> -citrate ABC transporter | -3,32 | 0,00017 | 0,00094 |
| Q9KTJ9                                    | syd      | Syd                                                                          | -3,29 | 0,00057 | 0,00177 |
| Q9KNW3                                    | VC_2617  | Arginine N-succinyltransferase                                               | -2,93 | 0,00002 | 0,00050 |
| Q9KU56                                    | mutH     | DNA mismatch repair protein MutH                                             | -2,90 | 0,00004 | 0,00050 |
| Q9KTZ6                                    | VC_0734  | Malate synthase                                                              | -2,81 | 0,00306 | 0,00389 |
| Q9KKQ7                                    | mtIA     | PTS system mannitol-specific EIICBA component                                | -2,80 | 0,00214 | 0,00343 |
| Q9KLB3                                    | VC_A0833 | Transcriptional regulator, LysR family                                       | -2,66 | 0,00379 | 0,00420 |
| Q9KTM2                                    | VC_0880  | Uncharacterized protein                                                      | -2,50 | 0,00364 | 0,00420 |
| Q9KSQ4                                    | hutH     | Histidine ammonia-lyase                                                      | -2,42 | 0,00105 | 0,00227 |
| Q9KPR5                                    | VC_2301  | Transcriptional activator, putative                                          | -2,39 | 0,00075 | 0,00195 |
| Q9KNF6                                    | VC_A0008 | Methyl-accepting chemotaxis protein                                          | -2,27 | 0,00264 | 0,00357 |
| Q9KRF2                                    | VC_1690  | Alpha-1,6-galactosidase, putative                                            | -2,25 | 0,00022 | 0,00110 |
| Q9KS52                                    | VC_1408  | Transcriptional regulator, TetR family                                       | -2,20 | 0,00047 | 0,00154 |
| Q9KUN3                                    | argP     | HTH-type transcriptional regulator ArgP                                      | -2,20 | 0,00006 | 0,00050 |
| Q9KU74                                    | VC_0649  | Transcriptional regulator, MarR family                                       | -2,08 | 0,00232 | 0,00343 |
| Q9KRA1                                    | VC_1741  | Transcriptional regulator, TetR family                                       | -2,03 | 0,00074 | 0,00195 |
| Q9KQ71                                    | VC_2130  | Flagellum-specific ATP synthase Flil                                         | -1,89 | 0,00016 | 0,00094 |
| Q9KUU2                                    | arcA     | Arginine deiminase                                                           | -1,88 | 0,00990 | 0,00732 |
| Q9KM69                                    | VC_A0519 | Fructose repressor                                                           | -1,80 | 0,00183 | 0,00331 |
| Q9KS51                                    | VC_1409  | Multidrug resistance protein, putative                                       | -1,77 | 0,00895 | 0,00699 |
| Q9KS17                                    | VC_1444  | Uncharacterized protein                                                      | -1,73 | 0,01228 | 0,00882 |
| P0C6Q5                                    | tcpF     | Toxin coregulated pilus biosynthesis protein F                               | -1,72 | 0,00006 | 0,00050 |
| Q9KVH8                                    | VC_0168  | Cytochrome c5                                                                | -1,65 | 0,00187 | 0,00331 |
| Q9KP69                                    | VC_2507  | PINc domain-containing protein                                               | -1,62 | 0,00903 | 0,00699 |
| Q9KM51                                    | VC_A0538 | Cytochrome b561, putative                                                    | -1,62 | 0,00417 | 0,00420 |
| Q9KTY1                                    | VC_0749  | Iron-sulfur cluster assembly scaffold protein IscU                           | -1,59 | 0,00072 | 0,00195 |
| Q9KMJ5                                    | VC_A0351 | Uncharacterized protein                                                      | -1,56 | 0,00615 | 0,00534 |
| Q9KS13                                    | VC_1449  | Uncharacterized protein                                                      | -1,54 | 0,01266 | 0,00895 |
| Q9KLM0                                    | VC_A0723 | 3-hydroxy-3-methylglutaryl CoA reductase                                     | -1,53 | 0,00266 | 0,00357 |
| Q9KV51                                    | VC_0306  | Thioredoxin                                                                  | -1,50 | 0,00255 | 0,00357 |
| Q9KRR1                                    | VC_1575  | Uncharacterized protein                                                      | -1,32 | 0,00274 | 0,00358 |
| Q9F854                                    | hisD     | Histidinol dehydrogenase                                                     | -1,28 | 0,00385 | 0,00420 |
| Q9KUS1                                    | pdxA     | 4-hydroxythreonine-4-phosphate dehydrogenase                                 | -1,25 | 0,00082 | 0,00195 |
| Q9KSI8                                    | VC_1268  | Uncharacterized protein                                                      | -1,13 | 0,00714 | 0,00600 |
| Q9KPA8                                    | VC_2465  | Sigma-E factor regulatory protein RseB                                       | -1,08 | 0,00400 | 0,00420 |
| Q9KLG6                                    | VC_A0778 | AHS2 domain-containing protein                                               | -1,08 | 0,00343 | 0,00420 |
| Q9KVJ1                                    | VC_0153  | Uncharacterized protein                                                      | -1,05 | 0,00936 | 0,00708 |
| II – 3. PresentJ420tgtTOB_AbsentF606wtTOB |          |                                                                              |       |         |         |
| Q9KNM4                                    | gmk      | Guanylate kinase                                                             |       |         |         |
| Q9KNC1                                    | VC_A0044 | Uncharacterized protein put mb protease                                      |       |         |         |
| Q9KRS9                                    | VC_1557  | Transcriptional regulator, LacI family lipid A biosynthesis acyltransferase  |       |         |         |

|                                             |           |                                                                                                           |                    |                |                         |
|---------------------------------------------|-----------|-----------------------------------------------------------------------------------------------------------|--------------------|----------------|-------------------------|
| Q9KQH2                                      | VC_2026   | Uncharacterized protein rRNA accumulation protein YceD                                                    |                    |                |                         |
| Q9KRR2                                      | VC_1574   | Uncharacterized protein put Transmembrane signal peptide protein                                          |                    |                |                         |
| Q9KT04                                      | VC_1101   | Uncharacterized protein putative tryptophan/tyrosine transport system substrate-binding protein or T6SS   |                    |                |                         |
| Q9KVH8                                      | VC_0168   | Cytochrome c5                                                                                             |                    |                |                         |
| Q9KR31                                      | VC_1816   | Uncharacterized protein 1 HYP TRANSPORTER                                                                 |                    |                |                         |
| Q9KQN0                                      | VC_1968   | Transcriptional regulator, HTH_3 family sutR regulator utilization of sulfur                              |                    |                |                         |
| Q9KNT7                                      | argB      | Acetylglutamate kinase ornithine and arginine biosynthesis                                                |                    |                |                         |
| Q9KU61                                      | VC_0662   | Branched-chain amino acid transport system carrier protein brnQ transport leucine, valine, and isoleucine |                    |                |                         |
| Q9KPR5                                      | VC_2301   | Transcriptional activator, putative putative anti-ECFsigma factor, ChrR                                   |                    |                |                         |
| Q9KQ26                                      | prmC      | Release factor glutamine methyltransferase                                                                |                    |                |                         |
| Q9KM00                                      | VC_A0589  | Peptide ABC transporter, permease protein, putative oligopeptide ABC transporter membrane subunit YeJ     |                    |                |                         |
| Q9KVR7                                      | VC_0072   | Sensory box/GGDEF family protein                                                                          |                    |                |                         |
| <b>II – 4. MoreJ420tgtTOB_ThanF606wtTOB</b> |           |                                                                                                           | <b>log2 wt/tgt</b> | <b>p value</b> | <b>Adjusted p value</b> |
| Q9KSP4                                      | VC_1212   | DNA polymerase                                                                                            | -2,38              | 0,01099        | 0,00512                 |
| Q9KR61                                      | nanK      | N-acetylmannosamine kinase                                                                                | -4,31              | 0,00003        | 0,00043                 |
| Q9KT86                                      | rnfA/rsxA | Ion-translocating oxidoreductase complex subunit A                                                        | -3,56              | 0,00002        | 0,00043                 |
| Q9KRT1                                      | VC_1555   | Uncharacterized protein                                                                                   | -1,48              | 0,00902        | 0,00488                 |
| Q9KV51                                      | VC_0306   | Thioredoxin trxA                                                                                          | -1,69              | 0,02226        | 0,00776                 |
| Q9KM51                                      | VC_A0538  | Cytochrome b561, putative                                                                                 | -2,87              | 0,00756        | 0,00474                 |
| Q9KNR9                                      | VC_2662   | Uncharacterized protein                                                                                   | -1,31              | 0,03255        | 0,00995                 |
| Q9KR73                                      | VC_1770   | Uncharacterized protein                                                                                   | -1,31              | 0,01849        | 0,00696                 |
| POC6C8                                      | fur       | Ferric uptake regulation protein                                                                          | -2,39              | 0,00030        | 0,00141                 |
| Q9KMN5                                      | VC_A0293  | Uncharacterized protein                                                                                   | -2,14              | 0,00017        | 0,00099                 |
| Q9KV88                                      | VC_0268   | Uncharacterized protein                                                                                   | -2,11              | 0,00406        | 0,00309                 |
| Q9KNQ9                                      | rraA      | Regulator of ribonuclease activity A                                                                      | -2,42              | 0,00310        | 0,00269                 |
| Q9KPZ5                                      | VC_2217   | Beta-N-acetylhexosaminidase                                                                               | -2,91              | 0,00054        | 0,00191                 |
| Q9KTN7                                      | tadA      | tRNA-specific adenosine deaminase                                                                         | -2,04              | 0,00110        | 0,00224                 |
| Q9KRP5                                      | VC_1591   | Oxidoreductase, short-chain dehydrogenase/reductase family                                                | -2,14              | 0,00804        | 0,00488                 |
| POC6C4                                      | flaB      | Flagellin B                                                                                               | -1,88              | 0,00131        | 0,00228                 |
| Q9KTZ8                                      | VC_0732   | Transcriptional regulator, LysR family oxyR like                                                          | -1,96              | 0,00070        | 0,00210                 |
| Q9KSV6                                      | VC_1150   | Uncharacterized protein                                                                                   | -1,29              | 0,01007        | 0,00488                 |
| Q9KVM9                                      | VC_0112   | Cytochrome c4                                                                                             | -2,60              | 0,01486        | 0,00616                 |
| Q9KVK6                                      | cdgJ      | Cyclic di-GMP phosphodiesterase CdgJ                                                                      | -3,89              | 0,00017        | 0,00099                 |
| Q9KR96                                      | VC_1746   | Transcriptional regulator, TetR family                                                                    | -1,85              | 0,00299        | 0,00269                 |
| POC6C5                                      | flaC      | Flagellin C OS=Vibrio cholerae serotype                                                                   | -1,82              | 0,00042        | 0,00166                 |
| Q9KPX7                                      | VC_2235   | Methyltransf_11 domain-containing protein                                                                 | -1,53              | 0,00144        | 0,00231                 |
| Q9KL76                                      | VC_A0871  | Transcriptional regulator, GntR family                                                                    | -1,20              | 0,00284        | 0,00269                 |

|        |          |                                                           |       |         |         |
|--------|----------|-----------------------------------------------------------|-------|---------|---------|
| Q9KQ58 | VC_2146  | Uncharacterized protein                                   | -1,38 | 0,00181 | 0,00235 |
| Q9KKP2 | ribB     | 3,4-dihydroxy-2-butanone 4-phosphate synthase             | -2,73 | 0,00036 | 0,00157 |
| Q9KNL7 | greB     | Transcription elongation factor GreB                      | -2,29 | 0,02154 | 0,00765 |
| Q9KV61 | VC_0296  | Biotin carboxyl carrier protein of acetyl-CoA carboxylase | -1,70 | 0,00429 | 0,00317 |
| Q9KUN2 | VC_0483  | Uncharacterized protein                                   | -1,46 | 0,00180 | 0,00235 |
| POC6P9 | tpx      | Thiol peroxidase                                          | -1,42 | 0,01847 | 0,00696 |
| Q9KN91 | VC_A0074 | GGDEF family protein                                      | -1,35 | 0,00934 | 0,00488 |
| Q9KV27 | nudC     | NADH pyrophosphatase                                      | -1,38 | 0,00104 | 0,00224 |
| Q9KTF3 | mrdB     | Peptidoglycan glycosyltransferase                         | -1,35 | 0,00766 | 0,00476 |
| Q9F854 | hisD     | Histidinol dehydrogenase                                  | -1,60 | 0,00994 | 0,00488 |
| Q9KV12 | miaA     | tRNA dimethylallyltransferase                             | -1,44 | 0,00177 | 0,00235 |
| Q9KT82 | VC_1023  | Putative gluconeogenesis factor                           | -1,72 | 0,02103 | 0,00754 |
| Q9KKQ1 | VC_A1051 | Uncharacterized protein                                   | -1,32 | 0,00452 | 0,00324 |
| Q9KKZ9 | VC_A0951 | UPF0145 protein VC_A0951                                  | -1,30 | 0,01376 | 0,00600 |
| Q9KLG6 | luxP     | Autoinducer 2-binding periplasmic protein LuxP            | -1,19 | 0,00413 | 0,00310 |
| Q9KTX4 | ndk      | Nucleoside diphosphate kinase                             | -1,10 | 0,01640 | 0,00653 |
| Q9KMJ8 | VC_A0345 | Uncharacterized protein                                   | -1,18 | 0,01699 | 0,00663 |
| Q9KU82 | rimP     | Ribosome maturation factor RimP                           | -1,24 | 0,01367 | 0,00600 |
| Q9KSF3 | VC_1303  | Para-aminobenzoate synthase, component I                  | -1,14 | 0,02352 | 0,00806 |
| Q9KS93 | queC     | 7-cyano-7-deazaguanine synthase                           | -1,01 | 0,01568 | 0,00635 |
| Q9KQM0 | VC_1978  | 5-deoxynucleotidase                                       | -1,18 | 0,00153 | 0,00231 |
| Q9KST2 | trpE     | Anthranilate synthase component 1                         | -1,86 | 0,03127 | 0,00968 |
| Q9KN74 | VC_A0091 | UPF0251 protein                                           | -1,10 | 0,01555 | 0,00634 |
| Q9KL95 | VC_A0851 | HATPase_c domain-containing protein                       | -1,55 | 0,00154 | 0,00231 |
| Q9KNJ9 | VC_2739  | AsmA domain-containing protein                            | -1,16 | 0,03228 | 0,00991 |

1747

1748

1749 **Table S2. Ribosome profiling.**

| ID                    | log2FoldChange | p value adj |
|-----------------------|----------------|-------------|
| <b>Transcripts UP</b> |                |             |
| <i>VC_RS08405</i>     | 5,16           | 2,54E-15    |
| <i>VC_RS08700</i>     | 4,78           | 5,99E-03    |
| <i>glpD</i>           | 4,19           | 1,40E-25    |
| <i>VC_RS00110</i>     | 3,89           | 4,75E-13    |
| <i>VC_RS08400</i>     | 3,83           | 3,23E-47    |
| <i>VC_RS07070</i>     | 3,78           | 2,77E-05    |
| <i>VC_RS16920</i>     | 3,64           | 9,32E-14    |
| <i>iscR</i>           | 3,56           | 1,67E-24    |
| <i>VC_RS15320</i>     | 3,47           | 4,97E-03    |
| <i>VC_RS16810</i>     | 3,26           | 4,95E-04    |
| <i>hscB</i>           | 3,14           | 6,58E-29    |
| <i>fadE</i>           | 3,01           | 4,79E-14    |
| <i>siaQ</i>           | 2,98           | 5,85E-06    |
| <i>VC_RS12540</i>     | 2,90           | 2,09E-07    |
| <i>VC_RS15715</i>     | 2,87           | 3,51E-03    |
| <i>VC_RS03415</i>     | 2,76           | 5,14E-06    |
| <i>pdhR</i>           | 2,69           | 4,02E-17    |
| <i>fadB</i>           | 2,69           | 3,71E-16    |
| <i>VC_RS05835</i>     | 2,66           | 2,21E-11    |
| <i>VC_RS12625</i>     | 2,63           | 9,15E-17    |
| <i>VC_RS15780</i>     | 2,57           | 3,00E-05    |
| <i>VC_RS06745</i>     | 2,56           | 1,00E-03    |
| <i>VC_RS02460</i>     | 2,53           | 4,43E-11    |
| <i>VC_RS15675</i>     | 2,51           | 1,77E-07    |
| <i>VC_RS03375</i>     | 2,50           | 3,27E-13    |
| <i>VC_RS15660</i>     | 2,50           | 7,01E-08    |
| <i>VC_RS12840</i>     | 2,45           | 1,93E-07    |
| <i>astA</i>           | 2,43           | 3,51E-08    |
| <i>VC_RS18335</i>     | 2,40           | 4,25E-05    |
| <i>VC_RS18385</i>     | 2,40           | 6,53E-07    |
| <i>VC_RS18760</i>     | 2,38           | 5,01E-03    |
| <i>VC_RS15265</i>     | 2,37           | 1,85E-06    |
| <i>VC_RS15655</i>     | 2,35           | 1,32E-08    |
| <i>VC_RS09590</i>     | 2,34           | 2,10E-16    |
| <i>VC_RS17980</i>     | 2,30           | 2,40E-07    |
| <i>rluC</i>           | 2,30           | 3,62E-12    |
| <i>VC_RS08995</i>     | 2,28           | 3,72E-05    |
| <i>VC_RS15750</i>     | 2,25           | 9,78E-13    |
| <i>VC_RS06650</i>     | 2,22           | 2,84E-03    |
| <i>VC_RS06240</i>     | 2,21           | 3,77E-07    |
| <i>VC_RS17900</i>     | 2,20           | 9,26E-06    |
| <i>dinB</i>           | 2,19           | 6,60E-05    |
| <i>VC_RS16075</i>     | 2,18           | 1,66E-06    |

|                   |      |          |
|-------------------|------|----------|
| <i>glpK</i>       | 2,13 | 5,64E-06 |
| <i>VC_RS03935</i> | 2,13 | 9,02E-06 |
| <i>VC_RS03750</i> | 2,13 | 3,89E-15 |
| <i>VC_RS09530</i> | 2,11 | 1,28E-03 |
| <i>iscA</i>       | 2,10 | 7,00E-11 |
| <i>VC_RS18910</i> | 2,02 | 1,35E-03 |
| <i>VC_RS18595</i> | 2,00 | 3,76E-06 |
| <i>VC_RS06645</i> | 1,99 | 5,86E-04 |
| <i>VC_RS17880</i> | 1,97 | 1,27E-06 |
| <i>VC_RS17250</i> | 1,96 | 1,02E-04 |
| <i>VC_RS14235</i> | 1,95 | 7,29E-04 |
| <i>vpsQ</i>       | 1,94 | 1,63E-05 |
| <i>VC_RS15795</i> | 1,92 | 3,27E-05 |
| <i>pncB</i>       | 1,92 | 2,09E-11 |
| <i>VC_RS14320</i> | 1,91 | 3,76E-03 |
| <i>VC_RS19075</i> | 1,89 | 1,12E-06 |
| <i>VC_RS18065</i> | 1,88 | 2,22E-05 |
| <i>VC_RS05480</i> | 1,86 | 1,03E-03 |
| <i>VC_RS09310</i> | 1,86 | 1,69E-03 |
| <i>VC_RS16025</i> | 1,83 | 1,60E-07 |
| <i>VC_RS05200</i> | 1,82 | 3,76E-03 |
| <i>VC_RS06880</i> | 1,81 | 4,25E-06 |
| <i>VC_RS03615</i> | 1,81 | 9,36E-03 |
| <i>sdhC</i>       | 1,80 | 8,98E-06 |
| <i>VC_RS12765</i> | 1,80 | 4,08E-06 |
| <i>vceC</i>       | 1,77 | 2,69E-06 |
| <i>VC_RS08690</i> | 1,77 | 1,16E-03 |
| <i>VC_RS18420</i> | 1,75 | 4,95E-06 |
| <i>VC_RS06145</i> | 1,75 | 9,56E-08 |
| <i>VC_RS13705</i> | 1,73 | 3,89E-03 |
| <i>VC_RS09775</i> | 1,72 | 1,29E-05 |
| <i>VC_RS00830</i> | 1,72 | 2,06E-09 |
| <i>VC_RS15990</i> | 1,71 | 4,18E-04 |
| <i>astD</i>       | 1,69 | 4,99E-05 |
| <i>rmuC</i>       | 1,69 | 3,91E-06 |
| <i>cobA</i>       | 1,67 | 6,18E-03 |
| <i>VC_RS06730</i> | 1,67 | 9,56E-03 |
| <i>VC_RS03925</i> | 1,67 | 2,64E-06 |
| <i>rpoE</i>       | 1,65 | 3,06E-04 |
| <i>VC_RS13840</i> | 1,64 | 1,26E-06 |
| <i>pspC</i>       | 1,62 | 5,50E-04 |
| <i>VC_RS05485</i> | 1,61 | 7,43E-04 |
| <i>VC_RS13775</i> | 1,60 | 2,22E-04 |
| <i>VC_RS13830</i> | 1,59 | 1,63E-05 |
| <i>VC_RS05795</i> | 1,59 | 8,95E-07 |
| <i>VC_RS04070</i> | 1,57 | 1,90E-04 |



|                   |      |          |
|-------------------|------|----------|
| <i>pspA</i>       | 1,55 | 6,11E-04 |
| <i>ectB</i>       | 1,54 | 6,29E-03 |
| <i>VC_RS18060</i> | 1,53 | 9,22E-06 |
| <i>bioA</i>       | 1,53 | 4,28E-03 |
| <i>VC_RS17350</i> | 1,50 | 2,41E-05 |
| <i>VC_RS16055</i> | 1,49 | 3,45E-04 |
| <i>VC_RS03930</i> | 1,49 | 2,68E-05 |
| <i>hppD</i>       | 1,49 | 1,68E-03 |
| <i>rmf</i>        | 1,48 | 6,04E-03 |
| <i>VC_RS18045</i> | 1,48 | 3,59E-03 |
| <i>pgl</i>        | 1,47 | 3,65E-04 |
| <i>VC_RS09410</i> | 1,46 | 1,81E-03 |
| <i>VC_RS15825</i> | 1,46 | 8,01E-04 |
| <i>VC_RS01860</i> | 1,46 | 4,25E-03 |
| <i>VC_RS00045</i> | 1,46 | 2,22E-04 |
| <i>VC_RS08415</i> | 1,45 | 5,19E-05 |
| <i>thiC</i>       | 1,44 | 3,32E-05 |
| <i>VC_RS03545</i> | 1,43 | 5,16E-04 |
| <i>VC_RS07590</i> | 1,42 | 2,00E-03 |
| <i>bioF</i>       | 1,39 | 3,28E-05 |
| <i>vcrM</i>       | 1,39 | 1,90E-03 |
| <i>VC_RS11130</i> | 1,38 | 4,37E-03 |
| <i>VC_RS13575</i> | 1,38 | 3,80E-03 |
| <i>thiD</i>       | 1,37 | 1,07E-05 |
| <i>VC_RS17170</i> | 1,37 | 5,86E-04 |
| <i>VC_RS00235</i> | 1,37 | 1,19E-04 |
| <i>VC_RS06940</i> | 1,37 | 1,53E-05 |
| <i>purM</i>       | 1,37 | 5,79E-04 |
| <i>emrD</i>       | 1,35 | 1,37E-04 |
| <i>rpoS</i>       | 1,32 | 9,84E-06 |
| <i>rpsN</i>       | 1,31 | 5,86E-04 |
| <i>iscU</i>       | 1,31 | 3,91E-04 |
| <i>VC_RS05395</i> | 1,30 | 3,89E-03 |
| <i>purN</i>       | 1,30 | 6,54E-05 |
| <i>VC_RS08990</i> | 1,29 | 2,00E-03 |
| <i>truB</i>       | 1,28 | 4,26E-04 |
| <i>rnc</i>        | 1,28 | 4,81E-03 |
| <i>VC_RS16325</i> | 1,28 | 3,14E-03 |
| <i>miaB</i>       | 1,25 | 1,55E-06 |
| <i>VC_RS00525</i> | 1,24 | 1,94E-03 |
| <i>VC_RS00310</i> | 1,24 | 2,05E-03 |
| <i>recN</i>       | 1,23 | 1,53E-04 |
| <i>VC_RS00450</i> | 1,23 | 6,52E-03 |
| <i>norR</i>       | 1,22 | 7,84E-04 |
| <i>rpmG</i>       | 1,22 | 9,32E-03 |
| <i>VC_RS05080</i> | 1,20 | 3,77E-06 |

|                         |       |          |
|-------------------------|-------|----------|
| <i>VC_RS00360</i>       | 1,20  | 7,07E-04 |
| <i>VC_RS17040</i>       | 1,20  | 2,06E-03 |
| <i>VC_RS11880</i>       | 1,20  | 5,73E-05 |
| <i>zwf</i>              | 1,19  | 9,56E-05 |
| <i>rimO</i>             | 1,18  | 8,37E-04 |
| <i>xseB</i>             | 1,18  | 1,46E-03 |
| <i>fadA</i>             | 1,17  | 5,74E-03 |
| <i>pspB</i>             | 1,17  | 7,83E-03 |
| <i>nhaA</i>             | 1,17  | 2,57E-03 |
| <i>gspl</i>             | 1,16  | 3,74E-03 |
| <i>VC_RS00180</i>       | 1,16  | 1,52E-03 |
| <i>rluB</i>             | 1,16  | 8,17E-05 |
| <i>VC_RS05405</i>       | 1,15  | 2,69E-03 |
| <i>queE</i>             | 1,15  | 9,97E-03 |
| <i>erpA</i>             | 1,12  | 9,42E-03 |
| <i>VC_RS05410</i>       | 1,11  | 2,47E-03 |
| <i>dbpA</i>             | 1,06  | 7,53E-03 |
| <i>VC_RS15770</i>       | 1,06  | 2,50E-03 |
| <i>VC_RS05800</i>       | 1,06  | 1,80E-03 |
| <i>VC_RS15765</i>       | 1,05  | 4,86E-03 |
| <i>ilvG</i>             | 1,02  | 9,03E-04 |
| <i>VC_RS17205</i>       | 1,02  | 2,74E-03 |
| <i>cgta</i>             | 1,02  | 2,06E-04 |
| <i>VC_RS08280</i>       | 1,01  | 7,16E-04 |
| <i>lepA</i>             | 0,98  | 1,30E-03 |
| <i>secD</i>             | 0,97  | 1,44E-04 |
| <i>secD</i>             | 0,97  | 1,44E-04 |
| <i>thil</i>             | 0,95  | 9,17E-03 |
| <i>yihI</i>             | 0,94  | 7,72E-03 |
| <i>nlpD</i>             | 0,93  | 6,99E-03 |
| <i>lipB</i>             | 0,93  | 3,85E-03 |
| <i>VC_RS03795</i>       | 0,92  | 6,44E-03 |
| <i>rpoH</i>             | 0,91  | 2,26E-04 |
| <i>VC_RS07895</i>       | 0,86  | 9,32E-03 |
| <i>ruvA</i>             | 0,86  | 4,66E-03 |
| <i>ruvB</i>             | 0,83  | 7,43E-03 |
| <i>mgtE</i>             | 0,83  | 2,99E-03 |
| <i>mgtE</i>             | 0,83  | 2,99E-03 |
| <i>der</i>              | 0,82  | 2,14E-03 |
| <i>lepB</i>             | 0,77  | 9,17E-03 |
| <b>Transcripts DOWN</b> |       |          |
| <i>tgt</i>              | -5,96 | 1,33E-07 |
| <i>treC</i>             | -4,79 | 2,04E-86 |
| <i>VC_RS07220</i>       | -4,54 | 2,03E-02 |
| <i>VC_RS06415</i>       | -4,35 | 1,81E-24 |
| <i>VC_RS08165</i>       | -4,34 | 5,68E-48 |

|                   |       |          |
|-------------------|-------|----------|
| <i>VC_RS06535</i> | -4,33 | 4,12E-20 |
| <i>treB</i>       | -4,26 | 3,95E-77 |
| <i>dcuC</i>       | -4,25 | 5,49E-40 |
| <i>frdD</i>       | -4,02 | 3,04E-05 |
| <i>VC_RS13520</i> | -4,01 | 8,27E-03 |
| <i>VC_RS12800</i> | -4,01 | 2,09E-15 |
| <i>VC_RS06405</i> | -3,90 | 5,49E-40 |
| <i>VC_RS18125</i> | -3,89 | 1,70E-24 |
| <i>adhE</i>       | -3,85 | 4,00E-38 |
| <i>VC_RS03955</i> | -3,85 | 1,12E-06 |
| <i>VC_RS03950</i> | -3,76 | 2,56E-13 |
| <i>frdC</i>       | -3,75 | 2,75E-14 |
| <i>VC_RS03300</i> | -3,73 | 7,21E-21 |
| <i>VC_RS06410</i> | -3,66 | 1,68E-19 |
| <i>VC_RS09000</i> | -3,62 | 6,89E-35 |
| <i>frdA</i>       | -3,50 | 3,01E-12 |
| <i>VC_RS16590</i> | -3,49 | 2,26E-11 |
| <i>VC_RS18120</i> | -3,45 | 5,19E-20 |
| <i>VC_RS11425</i> | -3,44 | 3,82E-18 |
| <i>VC_RS17100</i> | -3,42 | 5,40E-24 |
| <i>grcA</i>       | -3,39 | 4,67E-14 |
| <i>nrdD</i>       | -3,38 | 6,19E-33 |
| <i>VC_RS14495</i> | -3,36 | 4,85E-02 |
| <i>pepT</i>       | -3,35 | 8,01E-18 |
| <i>menC</i>       | -3,34 | 2,34E-16 |
| <i>VC_RS03305</i> | -3,30 | 5,57E-23 |
| <i>VC_RS13030</i> | -3,30 | 2,56E-03 |
| <i>VC_RS09030</i> | -3,16 | 1,21E-22 |
| <i>VC_RS10340</i> | -3,13 | 1,28E-10 |
| <i>VC_RS09395</i> | -3,12 | 4,11E-18 |
| <i>VC_RS18865</i> | -3,06 | 6,78E-05 |
| <i>VC_RS09390</i> | -3,06 | 2,71E-20 |
| <i>menE</i>       | -3,05 | 1,43E-13 |
| <i>yccS</i>       | -2,99 | 1,50E-20 |
| <i>pykF</i>       | -2,94 | 2,21E-27 |
| <i>VC_RS13475</i> | -2,93 | 4,46E-19 |
| <i>VC_RS04335</i> | -2,90 | 6,37E-19 |
| <i>nrdG</i>       | -2,86 | 8,31E-09 |
| <i>ompW</i>       | -2,82 | 1,14E-12 |
| <i>VC_RS14490</i> | -2,81 | 4,01E-02 |
| <i>pfkA</i>       | -2,80 | 1,13E-25 |
| <i>menB</i>       | -2,69 | 5,30E-14 |
| <i>VC_RS16905</i> | -2,69 | 5,23E-27 |
| <i>VC_RS16240</i> | -2,65 | 1,77E-14 |
| <i>pflB</i>       | -2,55 | 2,04E-18 |
| <i>VC_RS10735</i> | -2,52 | 3,50E-09 |

|                   |       |          |
|-------------------|-------|----------|
| <i>VC_RS02445</i> | -2,44 | 3,57E-12 |
| <i>VC_RS10000</i> | -2,42 | 7,69E-10 |
| <i>vesC</i>       | -2,41 | 4,62E-15 |
| <i>VC_RS14330</i> | -2,41 | 5,14E-15 |
| <i>VC_RS10325</i> | -2,41 | 6,01E-11 |
| <i>gap</i>        | -2,38 | 1,72E-13 |
| <i>VC_RS03835</i> | -2,37 | 3,58E-08 |
| <i>pgi</i>        | -2,30 | 3,04E-18 |
| <i>VC_RS09625</i> | -2,30 | 4,67E-14 |
| <i>malT</i>       | -2,28 | 1,93E-13 |
| <i>malQ</i>       | -2,26 | 4,59E-15 |
| <i>VC_RS02160</i> | -2,20 | 1,11E-14 |
| <i>VC_RS05160</i> | -2,19 | 1,61E-17 |
| <i>VC_RS14510</i> | -2,19 | 4,33E-04 |
| <i>VC_RS02215</i> | -2,18 | 1,52E-05 |
| <i>VC_RS17420</i> | -2,18 | 8,35E-17 |
| <i>glmS</i>       | -2,18 | 3,77E-04 |
| <i>VC_RS14455</i> | -2,16 | 7,21E-21 |
| <i>bioD</i>       | -2,15 | 2,32E-15 |
| <i>malF</i>       | -2,11 | 7,13E-15 |
| <i>VC_RS06340</i> | -2,07 | 2,48E-11 |
| <i>VC_RS08370</i> | -2,05 | 1,61E-03 |
| <i>VC_RS02435</i> | -2,04 | 7,63E-04 |
| <i>ppc</i>        | -2,04 | 4,69E-17 |
| <i>VC_RS12995</i> | -2,04 | 5,80E-09 |
| <i>ilvC</i>       | -2,01 | 6,88E-10 |
| <i>gpmM</i>       | -2,01 | 2,13E-13 |
| <i>nhaC</i>       | -2,01 | 5,45E-17 |
| <i>narQ</i>       | -2,00 | 7,24E-04 |
| <i>feoB</i>       | -1,95 | 1,14E-04 |
| <i>VC_RS03315</i> | -1,94 | 9,33E-10 |
| <i>VC_RS14530</i> | -1,94 | 1,56E-02 |
| <i>malK</i>       | -1,93 | 4,62E-15 |
| <i>VC_RS03320</i> | -1,92 | 3,28E-06 |
| <i>raiA</i>       | -1,91 | 6,39E-05 |
| <i>VC_RS08805</i> | -1,90 | 2,13E-02 |
| <i>malE</i>       | -1,90 | 1,05E-13 |
| <i>VC_RS13960</i> | -1,89 | 2,50E-04 |
| <i>VC_RS15980</i> | -1,89 | 2,11E-11 |
| <i>eno</i>        | -1,89 | 3,01E-12 |
| <i>VC_RS14460</i> | -1,89 | 4,21E-12 |
| <i>edd</i>        | -1,88 | 7,92E-09 |
| <i>VC_RS01665</i> | -1,88 | 8,78E-06 |
| <i>elbB</i>       | -1,88 | 1,66E-05 |
| <i>malG</i>       | -1,88 | 6,61E-16 |
| <i>tpiA</i>       | -1,87 | 2,63E-10 |

|                   |       |          |
|-------------------|-------|----------|
| <i>VC_RS05825</i> | -1,85 | 4,69E-07 |
| <i>VC_RS05625</i> | -1,84 | 5,26E-07 |
| <i>VC_RS00575</i> | -1,76 | 3,28E-04 |
| <i>VC_RS04300</i> | -1,75 | 9,63E-13 |
| <i>VC_RS08210</i> | -1,73 | 1,90E-05 |
| <i>VC_RS11965</i> | -1,71 | 1,10E-07 |
| <i>VC_RS05975</i> | -1,68 | 4,73E-05 |
| <i>ptsI</i>       | -1,68 | 2,67E-08 |
| <i>VC_RS11420</i> | -1,63 | 1,01E-05 |
| <i>VC_RS02480</i> | -1,59 | 4,28E-03 |
| <i>VC_RS18185</i> | -1,58 | 7,43E-08 |
| <i>foIA</i>       | -1,58 | 2,16E-05 |
| <i>VC_RS09155</i> | -1,57 | 4,41E-05 |
| <i>VC_RS06100</i> | -1,56 | 7,43E-03 |
| <i>VC_RS13010</i> | -1,55 | 6,39E-03 |
| <i>tcpP</i>       | -1,55 | 2,45E-06 |
| <i>glgB</i>       | -1,55 | 3,74E-05 |
| <i>VC_RS00620</i> | -1,55 | 6,37E-09 |
| <i>VC_RS16100</i> | -1,53 | 1,92E-10 |
| <i>fbaA</i>       | -1,52 | 1,93E-06 |
| <i>VC_RS11495</i> | -1,52 | 3,89E-04 |
| <i>ushA</i>       | -1,51 | 6,73E-07 |
| <i>hlyA</i>       | -1,49 | 4,31E-08 |
| <i>fdh3B</i>      | -1,49 | 5,16E-06 |
| <i>VC_RS05670</i> | -1,49 | 1,67E-04 |
| <i>crp</i>        | -1,47 | 5,77E-10 |
| <i>VC_RS07315</i> | -1,46 | 4,15E-09 |
| <i>VC_RS04785</i> | -1,46 | 2,40E-07 |
| <i>nagK</i>       | -1,44 | 6,82E-06 |
| <i>lamB</i>       | -1,43 | 7,42E-06 |
| <i>pal</i>        | -1,43 | 2,31E-04 |
| <i>VC_RS02505</i> | -1,42 | 2,01E-03 |
| <i>VC_RS08795</i> | -1,41 | 8,87E-03 |
| <i>ccmD</i>       | -1,40 | 4,93E-02 |
| <i>gltB</i>       | -1,39 | 7,58E-08 |
| <i>gltB</i>       | -1,39 | 7,58E-08 |
| <i>VC_RS11435</i> | -1,38 | 3,62E-05 |
| <i>VC_RS02090</i> | -1,38 | 1,06E-02 |
| <i>fruA</i>       | -1,37 | 3,76E-10 |
| <i>VC_RS14360</i> | -1,37 | 6,67E-06 |
| <i>hcp-2</i>      | -1,37 | 1,35E-03 |
| <i>hcp-2</i>      | -1,37 | 1,35E-03 |
| <i>fruB</i>       | -1,36 | 1,89E-07 |
| <i>VC_RS11635</i> | -1,36 | 1,17E-05 |
| <i>VC_RS16670</i> | -1,35 | 3,55E-04 |
| <i>VC_RS07305</i> | -1,35 | 2,69E-06 |

|                   |       |          |
|-------------------|-------|----------|
| <i>VC_RS13950</i> | -1,34 | 1,50E-03 |
| <i>VC_RS08520</i> | -1,34 | 2,22E-05 |
| <i>menH</i>       | -1,33 | 9,08E-03 |
| <i>VC_RS05665</i> | -1,33 | 2,65E-03 |
| <i>VC_RS17105</i> | -1,32 | 1,71E-03 |
| <i>VC_RS02210</i> | -1,32 | 3,87E-04 |
| <i>ptsG</i>       | -1,29 | 2,17E-06 |
| <i>VC_RS05295</i> | -1,28 | 1,39E-04 |
| <i>VC_RS01370</i> | -1,27 | 1,44E-03 |
| <i>pfkB</i>       | -1,27 | 2,74E-05 |
| <i>VC_RS09325</i> | -1,27 | 4,85E-02 |
| <i>VC_RS02820</i> | -1,25 | 2,75E-02 |
| <i>galK</i>       | -1,24 | 3,60E-04 |
| <i>VC_RS01625</i> | -1,24 | 2,75E-03 |
| <i>VC_RS03680</i> | -1,22 | 2,37E-02 |
| <i>VC_RS18380</i> | -1,21 | 1,44E-03 |
| <i>katG</i>       | -1,21 | 1,44E-03 |
| <i>pntB</i>       | -1,21 | 1,32E-04 |
| <i>VC_RS07330</i> | -1,21 | 4,84E-06 |
| <i>VC_RS14215</i> | -1,21 | 1,92E-02 |
| <i>ccoO</i>       | -1,20 | 4,76E-02 |
| <i>VC_RS01395</i> | -1,20 | 2,02E-02 |
| <i>tssM</i>       | -1,19 | 6,95E-04 |
| <i>VC_RS01300</i> | -1,19 | 1,01E-02 |
| <i>asnB</i>       | -1,18 | 3,77E-05 |
| <i>tusB</i>       | -1,18 | 2,69E-03 |
| <i>VC_RS05860</i> | -1,18 | 4,25E-03 |
| <i>VC_RS14825</i> | -1,18 | 9,82E-03 |
| <i>VC_RS11350</i> | -1,18 | 2,09E-03 |
| <i>VC_RS02830</i> | -1,18 | 3,88E-03 |
| <i>VC_RS14815</i> | -1,17 | 2,31E-04 |
| <i>VC_RS18835</i> | -1,17 | 3,09E-02 |
| <i>VC_RS08225</i> | -1,17 | 2,91E-03 |
| <i>modC</i>       | -1,16 | 3,88E-03 |
| <i>VC_RS16360</i> | -1,16 | 4,86E-03 |
| <i>VC_RS01390</i> | -1,16 | 1,96E-04 |
| <i>VC_RS14820</i> | -1,15 | 3,49E-04 |
| <i>tcpH</i>       | -1,15 | 2,13E-02 |
| <i>VC_RS01790</i> | -1,14 | 2,16E-05 |
| <i>VC_RS08240</i> | -1,14 | 1,35E-02 |
| <i>tagO</i>       | -1,14 | 4,81E-02 |
| <i>fliN</i>       | -1,14 | 4,99E-05 |
| <i>VC_RS05660</i> | -1,12 | 9,93E-03 |
| <i>VC_RS00855</i> | -1,12 | 2,41E-04 |
| <i>arcA</i>       | -1,12 | 9,12E-03 |
| <i>arcA</i>       | -1,12 | 9,12E-03 |

|                   |       |          |
|-------------------|-------|----------|
| <i>VC_RS18700</i> | -1,11 | 4,29E-03 |
| <i>VC_RS00635</i> | -1,11 | 3,88E-03 |
| <i>can</i>        | -1,11 | 1,35E-03 |
| <i>VC_RS09920</i> | -1,11 | 7,19E-05 |
| <i>VC_RS11900</i> | -1,10 | 1,07E-03 |
| <i>ycfP</i>       | -1,09 | 1,73E-03 |
| <i>galM</i>       | -1,08 | 9,41E-03 |
| <i>VC_RS17495</i> | -1,08 | 4,37E-05 |
| <i>VC_RS09885</i> | -1,07 | 7,65E-04 |
| <i>VC_RS12600</i> | -1,07 | 2,42E-02 |
| <i>VC_RS10600</i> | -1,07 | 3,60E-04 |
| <i>VC_RS09255</i> | -1,06 | 2,13E-02 |
| <i>VC_RS11255</i> | -1,06 | 2,99E-03 |
| <i>oadA</i>       | -1,06 | 1,00E-02 |
| <i>oadA</i>       | -1,06 | 1,00E-02 |
| <i>nudF</i>       | -1,05 | 2,57E-03 |
| <i>VC_RS06640</i> | -1,05 | 6,18E-04 |
| <i>VC_RS15915</i> | -1,05 | 6,89E-04 |
| <i>rhtB</i>       | -1,04 | 1,80E-02 |
| <i>rimI</i>       | -1,04 | 3,82E-02 |
| <i>minE</i>       | -1,04 | 1,57E-02 |
| <i>VC_RS17175</i> | -1,04 | 4,67E-04 |
| <i>VC_RS00770</i> | -1,03 | 7,83E-03 |
| <i>VC_RS12105</i> | -1,03 | 1,93E-02 |
| <i>hupA</i>       | -1,03 | 2,50E-03 |
| <i>VC_RS06960</i> | -1,02 | 3,49E-02 |
| <i>VC_RS10580</i> | -1,02 | 6,78E-05 |
| <i>VC_RS10825</i> | -1,02 | 4,93E-02 |
| <i>VC_RS11450</i> | -1,01 | 1,11E-02 |
| <i>VC_RS03100</i> | -1,01 | 8,64E-03 |
| <i>chiS</i>       | -1,00 | 7,43E-04 |

1750

1751 **Table S3. RNA-seq V. cholerae WT/ $\Delta$ tgt, in MH and TOB. Only significant differences higher than 2-**  
 1752 **fold are shown.**

| MH         |                  |            |          |                         |          |
|------------|------------------|------------|----------|-------------------------|----------|
| locus_tag  | old_locus_tag    | gene       | baseMean | log2FC WT/ $\Delta$ tgt | padj     |
| VC_RS03715 | VC0741,VC_0741   | tgt        | 3412     | 6,91                    | 3,3E-168 |
| VC_RS13030 | VC2706,VC_2706   | yhhQ       | 5207     | 5,12                    | 4,6E-148 |
| VC_RS17680 | VC_A0913,VCA0913 | hutB       | 298      | 3,23                    | 1,1E-06  |
| VC_RS17670 | VC_A0911,VCA0911 | exbB       | 234      | 3,18                    | 5,8E-07  |
| VC_RS17690 | VC_A0915,VCA0915 | hutD       | 131      | 2,91                    | 3,5E-05  |
| VC_RS17675 | VC_A0912,VCA0912 | exbD       | 329      | 2,88                    | 1,6E-09  |
| VC_RS17685 | VC_A0914,VCA0914 | btuC/fecCD | 362      | 2,80                    | 2,7E-05  |
| VC_RS03875 | VC0773,VC_0773   | entC       | 64       | 2,53                    | 2,4E-04  |
| VC_RS16165 | VC_A0576,VCA0576 | hutA       | 4750     | 2,51                    | 5,1E-06  |
| VC_RS17665 | VC_A0910,VCA0910 | tonB1      | 400      | 2,46                    | 9,5E-07  |
| VC_RS14430 | VC_A0229,VCA0229 | febD       | 356      | 2,44                    | 1,4E-07  |
| VC_RS17655 | VC_A0908,VCA0908 | hutX       | 1037     | 2,37                    | 9,5E-07  |
| VC_RS14435 | VC_A0230,VCA0230 | fhuC       | 617      | 2,34                    | 1,7E-04  |
| VC_RS17660 | VC_A0909,VCA0909 | hutW       | 1132     | 2,23                    | 7,3E-07  |
| VC_RS02435 | VC0475,VC_0475   | cirA       | 826      | 2,02                    | 1,7E-03  |
| VC_RS14425 | VC_A0228,VCA0228 | fepD       | 454      | 2,02                    | 1,9E-07  |
| VC_RS17650 | VC_A0907,VCA0907 | hutZ       | 3146     | 1,87                    | 8,8E-06  |
| VC_RS17955 | VC_A0977,VCA0977 | yejF       | 454      | 1,81                    | 3,9E-08  |
| VC_RS14420 | VC_A0227,VCA0227 | gcvH       | 2378     | 1,78                    | 1,4E-05  |
| VC_RS17950 | VC_A0976,VCA0976 |            | 103      | 1,70                    | 2,7E-02  |
| VC_RS08170 | VC1688,VC_1688   | mgIC       | 137      | 1,65                    | 1,2E-02  |
| VC_RS07460 | VC1542,VC_1542   | ligA       | 54       | 1,64                    | 1,3E-04  |
| VC_RS03070 | VC0606,VC_0606   | glnK       | 174      | 1,59                    | 7,0E-03  |
| VC_RS07475 | VC1545,VC_1545   | exbB       | 306      | 1,54                    | 1,3E-04  |
| VC_RS07470 | VC1544,VC_1544   | exbD       | 354      | 1,46                    | 4,2E-04  |
| VC_RS16600 | VC_A0676,VCA0676 | napF       | 1952     | 1,45                    | 4,1E-02  |
| VC_RS13690 | VC_A0064,VCA0064 | thiS       | 198      | 1,44                    | 1,8E-03  |
| VC_RS13695 | VC_A0065,VCA0065 | thiG       | 180      | 1,42                    | 6,3E-04  |
| VC_RS01835 | VC0365,VC_0365   | bfr        | 2422     | 1,39                    | 1,1E-06  |
| VC_RS07465 | VC1543,VC_1543   |            | 1162     | 1,39                    | 3,2E-04  |
| VC_RS10685 | VC2210,VC_2210   | viuB       | 550      | 1,34                    | 8,9E-04  |
| VC_RS02430 | VC0474,VC_0474   | irgB       | 157      | 1,33                    | 1,8E-02  |
| VC_RS07595 | VC1572,VC_1572   |            | 27       | 1,28                    | 2,9E-02  |
| VC_RS00985 | VC0201,VC_0201   | fhuC       | 92       | 1,27                    | 3,2E-02  |
| VC_RS00980 | VC0200,VC_0200   | fhuA       | 2454     | 1,25                    | 3,7E-03  |
| VC_RS07600 | VC1573,VC_1573   | fumC       | 197      | 1,25                    | 9,7E-05  |
| VC_RS10690 | VC2211,VC_2211   | viuA       | 527      | 1,24                    | 4,5E-05  |
| VC_RS07480 | VC1546,VC_1546   | exbB       | 303      | 1,23                    | 2,0E-03  |
| VC_RS03900 | VC0778,VC_0778   | fepG       | 53       | 1,19                    | 4,6E-02  |
| VC_RS03080 | VC0608,VC_0608   | fbpA       | 4516     | 1,18                    | 1,3E-04  |



|            |                  |                  |     |      |         |
|------------|------------------|------------------|-----|------|---------|
| VC_RS13685 | VC_A0063,VCA0063 | ptrB             | 280 | 1,16 | 5,1E-03 |
| VC_RS04975 | VC1009,VC_1009   |                  | 505 | 1,16 | 1,1E-05 |
| VC_RS02570 | VC0504,VC_0504   | susC (tonB-like) | 42  | 1,11 | 3,2E-02 |
| VC_RS06170 | VC1265,VC_1265   | cytochrome C     | 511 | 1,10 | 1,3E-02 |
| VC_RS07485 | VC1547,VC_1547   | exbB             | 692 | 1,09 | 6,0E-04 |
| VC_RS05755 | VC1174,VC_1174   | trpE             | 263 | 1,07 | 9,7E-05 |
| VC_RS03865 | VC0771,VC_0771   | vibB             | 412 | 1,06 | 1,1E-03 |
| VC_RS16595 | VC_A0675,VCA0675 | narQ             | 770 | 1,03 | 4,9E-02 |
| VC_RS16075 | VC_A0558,VCA0558 | yfjD             | 516 | 1,03 | 2,5E-02 |
| VC_RS01830 | VC0364,VC_0364   | bfd              | 321 | 1,02 | 8,2E-03 |
| VC_RS14440 | VC_A0231,VCA0231 | yqhC             | 272 | 1,00 | 2,7E-02 |
| VC_RS02480 | VC0486,VC_0486   | srlR             | 748 | 1    | 3,2E-03 |
| VC_RS12970 | VC2694,VC_2694   | sodA             | 503 | 0,80 | 5,1E-03 |

| <b>TOB</b>       |                      |                   |                 |                                                     |             |
|------------------|----------------------|-------------------|-----------------|-----------------------------------------------------|-------------|
| <b>locus_tag</b> | <b>old_locus_tag</b> | <b>gene</b>       | <b>baseMean</b> | <b>log2FoldChange<br/>WT/<math>\Delta</math>tgt</b> | <b>padj</b> |
| VC_RS03715       | VC0741,VC_0741       | tgt               | 3412            | 5,991                                               | 5,0E-181    |
| VC_RS13030       | VC2706,VC_2706       | yhhQ              | 5207            | 4,392                                               | 6,2E-114    |
| VC_RS02575       | VC0505,VC_0505       |                   | 8               | 3,806                                               | 2,8E-02     |
| VC_RS00075       | VC0018,VC_0018       | ibpA              | 4235            | 1,919                                               | 1,5E-03     |
| VC_RS04265       | VC0855,VC_0855       | dnaK              | 17310           | 1,863                                               | 3,5E-03     |
| VC_RS02570       | VC0504,VC_0504       | susC (tonB)       | 42              | 1,823                                               | 2,1E-04     |
| VC_RS04385       | VC0885,VC_0885       |                   | 97              | 1,812                                               | 1,7E-03     |
| VC_RS03575       | VC0711,VC_0711       | clpB              | 2525            | 1,688                                               | 1,2E-02     |
| VC_RS04835       | VC0977,VC_0977       | cnoX              | 522             | 1,595                                               | 2,3E-03     |
| VC_RS02995       | VC0589,VC_0589       | yadG              | 518             | 1,586                                               | 2,3E-02     |
| VC_RS12835       | VC2665,VC_2665       | groES1            | 2421            | 1,555                                               | 4,6E-02     |
| VC_RS18020       | VC_A0989,VCA0989     | dinF              | 136             | 1,511                                               | 2,5E-02     |
| VC_RS04870       | VC0985,VC_0985       | htpG              | 9334            | 1,507                                               | 4,5E-02     |
| VC_RS05980       | VC1217,VC_1217       | yjgM              | 88              | 1,406                                               | 7,7E-03     |
| VC_RS04390       | VC0886,VC_0886       |                   | 208             | 1,381                                               | 5,8E-03     |
| VC_RS16915       | VC_A0744,VCA0744     | glpK              | 1194            | 1,317                                               | 1,8E-09     |
| VC_RS12880       | VC2674,VC_2674       | hslU              | 1673            | 1,268                                               | 1,6E-02     |
| VC_RS12885       | VC2675,VC_2675       | hslV              | 365             | 1,261                                               | 5,9E-03     |
| VC_RS00930       | VC0188,VC_0188       | prlC              | 2248            | 1,194                                               | 8,4E-03     |
| VC_RS01320       | VC0271,VC_0271       | corC              | 728             | 1,155                                               | 1,2E-03     |
| VC_RS02400       | VC0468,VC_0468       | gshB              | 1377            | 1,124                                               | 1,8E-04     |
| VC_RS06455       | VC1325,VC_1325       | mglB              | 1478            | 1,089                                               | 8,0E-05     |
| VC_RS09260       | VC1920,VC_1920       | lon               | 3601            | 1,066                                               | 2,3E-02     |
| VC_RS02395       | VC0467,VC_0467       | yggE              | 541             | 1,055                                               | 6,7E-04     |
| VC_RS17520       | VC_A0881,VCA0881     |                   | 196             | 1,033                                               | 1,4E-02     |
| VC_RS17525       | VC_A0882,VCA0882     |                   | 289             | 1,021                                               | 3,2E-03     |
| VC_RS12360       | VC2564,VC_2564       | dbpA              | 618             | -1,017                                              | 3,0E-02     |
| VC_RS15790       | VC_A0494,VCA0494     | acetyltransferase | 70              | -1,028                                              | 3,7E-02     |

|            |                  |                      |       |        |         |
|------------|------------------|----------------------|-------|--------|---------|
| VC_RS03960 | VC0792,VC_0792   | yjF oad              | 28    | -1,029 | 2,6E-02 |
| VC_RS14205 | VC_A0179,VCA0179 | psuT                 | 156   | -1,038 | 3,3E-02 |
| VC_RS18615 | VC_1646          |                      | 27    | -1,057 | 4,6E-02 |
| VC_RS05270 | VC1071,VC_1071   | arsJ                 | 117   | -1,093 | 4,0E-03 |
| VC_RS07060 | VC1458,VC_1458   | zot                  | 640   | -1,102 | 1,8E-02 |
| VC_RS09405 | VC1953,VC_1953   | nupX                 | 95    | -1,131 | 2,3E-02 |
| VC_RS18070 | VC_A1000,VCA1000 | leuE                 | 62    | -1,139 | 3,8E-02 |
| VC_RS12345 | VC2561,VC_2561   | cobA                 | 78    | -1,143 | 3,3E-02 |
| VC_RS15320 |                  |                      | 90    | -1,171 | 1,4E-02 |
| VC_RS06240 | VC1279,VC_1279   | betT                 | 572   | -1,246 | 9,9E-04 |
| VC_RS15780 | VC_A0492,VCA0492 | RfbP-related protein | 323   | -1,262 | 8,5E-07 |
| VC_RS07075 | VC1461,VC_1461   | cep ctx              | 2195  | -1,282 | 1,9E-04 |
| VC_RS12540 | VC2600,VC_2600   | yejM                 | 397   | -1,31  | 3,0E-03 |
| VC_RS01360 | VC0280,VC_0280   | cadB                 | 47    | -1,346 | 5,1E-03 |
| VC_RS16860 | VC_A0732,VCA0732 | ygiW                 | 881   | -1,417 | 1,5E-03 |
| VC_RS18060 | VC_A0998,VCA0998 | nemA                 | 385   | -1,446 | 3,0E-02 |
| VC_RS08700 | VC1801,VC_1801   |                      | 74    | -1,462 | 2,6E-02 |
| VC_RS01365 | VC0281,VC_0281   | cadA ldcI            | 60    | -1,489 | 1,7E-03 |
| VC_RS07640 | VC1581,VC_1581   | nuoL                 | 56    | -1,502 | 5,4E-03 |
| VC_RS18100 | VC_A1006,VCA1006 | osmC                 | 77    | -1,521 | 2,0E-03 |
| VC_RS07080 | VC1462,VC_1462   | rstB2                | 4846  | -1,523 | 1,2E-04 |
| VC_RS17365 | VC_A0847,VCA0847 | yjeH                 | 141   | -1,535 | 3,6E-04 |
| VC_RS05275 | VC1073,VC_1073   |                      | 235   | -1,617 | 1,0E-05 |
| VC_RS08705 | VC1802,VC_1802   |                      | 35    | -1,77  | 8,5E-03 |
| VC_RS08695 |                  |                      | 66    | -1,778 | 1,3E-03 |
| VC_RS08680 | VC1798,VC_1798   | eha                  | 131   | -1,804 | 2,2E-05 |
| VC_RS08690 | VC1800,VC_1800   |                      | 183   | -1,851 | 8,0E-05 |
| VC_RS07065 | VC1459,VC_1459   | ace                  | 152   | -1,939 | 4,0E-02 |
| VC_RS08685 | VC1799,VC_1799   | phage transposase    | 302   | -2,376 | 1,4E-08 |
| VC_RS07040 | VC1454,VC_1454   | rstA1                | 29530 | -2,705 | 1,9E-04 |
| VC_RS07070 | VC1460,VC_1460   | orfU ctx             | 1156  | -2,774 | 3,9E-08 |
| VC_RS07085 | VC1463,VC_1463   | rstA2                | 29040 | -2,893 | 5,1E-05 |

1753

1754

1755 **Table S4: Primers, plasmids and strains**

1756

**gene expressions from pSEVA**

| plasmid strain | in | name       | primers used for gene amplification                                                                      |
|----------------|----|------------|----------------------------------------------------------------------------------------------------------|
| <b>M027</b>    |    | pSEVA238   | MCSSEVA238-5 GCAAGAAGCGGATACAGGAG<br>MCSSEVA238-3 GGTTCCTCCAGTCACGACGC                                   |
| <b>R591</b>    |    | pSEVA-tgt  | 5tgtEcoRI CGCGGAATTCGTGAAATTTAAAATTTGAACTG and<br>3tgtXbaI CGCGTCTAGATCAGGCTTTGTCTTTTGTAGTGG             |
| <b>Q298</b>    |    | pSEVA-rsxA | ZIP753 GCCCGAATTCATTGCCACTTATTGCG and<br>ZIP754 GCCGCCGAATTCCTACAGTTTACCAATCCGGTAAAGCC                   |
| <b>Q294</b>    |    | pSEVA-soxR | ZIP757 GGGGCCCGCCGAATTCGTAAAGCGTTTTTTAATAAAACGGG and ZIP758<br>CCGAATTCCTAACGGCTCCACTCTTCTGGATGCGATAAGCG |
| <b>Q291</b>    |    | pSEVA-katG | ZIP755 GCGCGCCCGAATTCATTTCCATTAGTGAAAAGGG and<br>ZIP756 GAATTCCTACATCGCGCCAGTTTGGCCACC                   |

**tRNA overexpression fragments cloned in pTOPO-blunt-kanamycin R (Ptrc promoter and Vct002 terminator are underlined, anticodon in red)**

| plasmid strain | in | name                     | sequence                                                                                                                                                                        |
|----------------|----|--------------------------|---------------------------------------------------------------------------------------------------------------------------------------------------------------------------------|
| <b>L961</b>    |    | Ptrc-eco-tRNA-Tyr wtGUA  | <u>GAGCTGTTGACAATTAATCATCCGGCTCGTATAATGTGTGGGGTGGGGTCCCGAGCG</u><br>GCCAAAGGGAGCAGACTGTAATCTGCCGTCACAGACTTCAAGGTTCAATCCTTCC<br>CCCACCACCATTATT <u>CGAGCTTAAGCTCAAAAACTACA</u>   |
| <b>M660</b>    |    | Ptrc-eco-tRNA-Tyr mutAUA | <u>GAGCTGTTGACAATTAATCATCCGGCTCGTATAATGTGTGGGGTGGGGTCCCGAGCG</u><br>GCCAAAGGGAGCAGACTATAATCTGCCGTCACAGACTTCAAGGTTCAATCCTTCC<br>CCCACCACCATTATT <u>CGAGCTTAAGCTCAAAAACTACA</u>   |
| <b>L957</b>    |    | Ptrc-eco-tRNA-Asp wt GUC | <u>GAGCTGTTGACAATTAATCATCCGGCTCGTATAATGTGTGGGGAGCGGTAGTTCAGTC</u><br>GGTTAGAATACCTGCCTGTACGCAGGGGGTTCGCGGGTTCGAGTCCCGTCCGTTCCGC<br><u>CACTTATTGAGCTTAAGCTCAAAAACTACA</u>        |
| <b>L960</b>    |    | Ptrc-vch-tRNA-Tyr wtGUA  | <u>GAGCTGTTGACAATTAATCATCCGGCTCGTATAATGTGTGGGGAGGGGTCCCGAGTG</u><br>GCCAAAGGGAGCAGACTGTAATCTGCCGGCTCCGCCTTCGATGGTTCGAATCCGTCC<br>CCCTCCACCATTATT <u>CGAGCTTAAGCTCAAAAACTACA</u> |
| <b>L959</b>    |    | Ptrc-vch-tRNA-Tyr mutAUA | <u>GAGCTGTTGACAATTAATCATCCGGCTCGTATAATGTGTGGGGAGGGGTCCCGAGTG</u><br>GCCAAAGGGAGCAGACTATAATCTGCCGGCTCCGCCTTCGATGGTTCGAATCCGTCC<br>CCCTCCACCATTATT <u>CGAGCTTAAGCTCAAAAACTACA</u> |
| <b>L956</b>    |    | Ptrc-vch-tRNA-Asp wtGUC  | <u>GAGCTGTTGACAATTAATCATCCGGCTCGTATAATGTGTGGGGAGCGGTAGTTCAGTC</u><br>GGTTAGAATACCGCCTGTACGCCGGGGTTCGCGGGTTCGAGTCCCGTCCGCTCCG<br>CACTTATTGAGCTTAAGCTCAAAAACTACA                  |
| <b>L955</b>    |    | Ptrc-vch-tRNA-mutAspAUC  | <u>GAGCTGTTGACAATTAATCATCCGGCTCGTATAATGTGTGGGGAGCGGTAGTTCAGTC</u><br>GGTTAGAATACCGCCTATCACGCCGGGGTTCGCGGGTTCGAGTCCCGTCCGCTCCGC<br>CACTTATTGAGCTTAAGCTCAAAAACTACA                |
| <b>M651</b>    |    | Ptrc-vch-tRNA-Asn wtGUU  | <u>GAGCTGTTGACAATTAATCATCCGGCTCGTATAATGTGTGGTCTCTCTAGCTCAGTCG</u><br>GTAGAGCGACGACTGTTAATCCGCAGGTCGCTGGTTCAAGTCCAGCAGGAGGAGCC<br>ACTTATTGAGCTTAAGCTCAAAAACTACA                  |
| <b>L962</b>    |    | Ptrc-vch-tRNA-Asn mutAUU | <u>GAGCTGTTGACAATTAATCATCCGGCTCGTATAATGTGTGGTCTCTCTAGCTCAGTCG</u><br>GTAGAGCGACGACTATTAATCCGCAGGTCGCTGGTTCAAGTCCAGCAGGAGGAGCC<br>ACTTATTGAGCTTAAGCTCAAAAACTACA                  |
| <b>M646</b>    |    | Ptrc-vch-tRNA-HIS wtGUG  | <u>GAGCTGTTGACAATTAATCATCCGGCTCGTATAATGTGTGGGTGGCTATAGCTCAGTT</u><br>GGTAGAGCCCGGATTGTGATTCGGTGTGCTGGGTTCGAGCCCCATTAGCCACCCC<br>ACTTATTGAGCTTAAGCTCAAAAACTACA                   |
| <b>L997</b>    |    | Ptrc-vch-tRNA-HIS mutAUG | <u>GAGCTGTTGACAATTAATCATCCGGCTCGTATAATGTGTGGGTGGCTATAGCTCAGTT</u><br>GGTAGAGCCCGGATTGTGATTCGGTGTGCTGGGTTCGAGCCCCATTAGCCACCCC<br>ACTTATTGAGCTTAAGCTCAAAAACTACA                   |
| <b>M653</b>    |    | Ptrc-vch-tRNA-Phe wtGAA  | <u>GAGCTGTTGACAATTAATCATCCGGCTCGTATAATGTGTGGGCCCGGATAGCTCAGTC</u><br>GGTAGAGCAGAGATTGAAATCCTCGTGTGGTTCGATTCCGCCTCCGGGCACC<br>ACTTATTGAGCTTAAGCTCAAAAACTACA                      |

**translational fusions ordered in pUC\_IDT (carbenicillin R)**

| plasmid strain | in | name | sequence |
|----------------|----|------|----------|
| <b>DH5α</b>    |    |      |          |

|             |                                 |                                                                                                                                                                                                                                                                                                                                                                                                                                                                                                                                                                                                                                                                                                                                                                                                                                                                                                                                                                                                                                                                                                                                                                                                                                                                                                                                                                                                                                                                            |
|-------------|---------------------------------|----------------------------------------------------------------------------------------------------------------------------------------------------------------------------------------------------------------------------------------------------------------------------------------------------------------------------------------------------------------------------------------------------------------------------------------------------------------------------------------------------------------------------------------------------------------------------------------------------------------------------------------------------------------------------------------------------------------------------------------------------------------------------------------------------------------------------------------------------------------------------------------------------------------------------------------------------------------------------------------------------------------------------------------------------------------------------------------------------------------------------------------------------------------------------------------------------------------------------------------------------------------------------------------------------------------------------------------------------------------------------------------------------------------------------------------------------------------------------|
| <b>R973</b> | P <sub>trc</sub> -rsxATAC-gfp   | TTGACAATTAATCATCCGGCTCGTATAATGTGTGGAATTGTGAGCGGATAACAATTTACACACAGGA<br>AACAGCGCCGATGACCGAATACCTTTTGTGTTAATCGGCACCGTGTGGTCAATAAATTTGTAC<br>TGGTGAAGTTTTGGGCTTATGCTCTTTATGGCGTATCAAAAACTAGAGACCGCCATTGGCA<br>TGGGGTTGGCGACGACATTGCTCCTCACCTTAGCTTCGGTGTGCGCTTACCTGGTGGAAAGTTAC<br>GTGTTACGTCGCTCGGCATTGAGTACCTGCGCACCATGAGCTTTATTTGGTGATCGTGTGCGTA<br>GTACAGTTCACCGAAATGGTGGTGCACAAAACAGTCCGACACTCTACCGCTGCTGGGCATTTTC<br>CTGCCACTCATACCACCAACTGTGCGGTATTAGGGGTTGCGCTGCTCAACATCAACGAAAAATCAC<br>AACTTTATTCAATCGATCATTTACGGTTTTGGCGCTGCTGTTGGCTTCTCGCTGGTGTCTATTGT<br>TCGCTTCAATGCGTGAGCGAATCCATGTAGCCGATGTCGCCGCTCCCTTTAAGGGCGCATCCATTG<br>CGATGATCACCGCAGGTTAATGTCTTTGGCCTTTATGGGCTTTACCGGATTGGTGAAGTGGCTA<br>GCAAAGGAGAAGAACTTTCACTGGAGTTGTCCCAATCTTGTGAATTAGATGGTGTGTTAATG<br>GGCACAATTTTCTGTCAAGTGGAGAGGGTGAAGGTGATGTACATACGAAAGCTTACCCTTAAA<br>TTTTTTGCACTACTGAAAACTACCTGTTCCATGGCCAACACTTGTCACTACTTTGACCTATGGTG<br>TTCAATGCTTTTCCGTTATCCGGATCATATGAAACGGCATGACTTTTAAAGAGTCCATGCCGCA<br>AGGTTATGTACAGGAACGCACTATATCTTTCAAAGATGACGGGAACTACAAGACGCGTGTGAAG<br>TCAAGTTTGAAGGTGATACCCTTGTAAATCGTATCGAGTAAAAGGTATTGATTTTAAAGAAGATG<br>GAAACATTCTCGGACACAACTCGAGTACAACATAAATCAACACATGTATACATCACGGCAGACA<br>AACAAAAGAAATGGAATCAAAGTAACTTCAAAAATCGCCACAACATTGAAGATGGAGGGCTTCAA<br>CTAGCAGACCATTATCAACAAAATACTCCAATTGGCGATGGCCCTGCTCTTTACCAGACAACCAAT<br>ACCTGTGACACAATCTGCCCTTTCGAAAGATCCCAACGAAAAGCGTGACCCATGGTCTCTTCTTG<br>AGTTTGAAGTGTGCTGGGATTACACATGGCATGGATGAGCTCTACAATAA |
| <b>R972</b> | P <sub>trc</sub> -rsxATATWT-gfp | TTGACAATTAATCATCCGGCTCGTATAATGTGTGGAATTGTGAGCGGATAACAATTTACACACAGGA<br>AACAGCGCCGATGACCGAATACCTTTTGTGTTAATCGGCACCGTGTGGTCAATAAATTTGTAC<br>TGGTGAAGTTTTGGGCTTATGCTCTTTATGGCGTATCAAAAACTAGAGACCGCCATTGGCA<br>TGGGGTTGGCGACGACATTGCTCCTCACCTTAGCTTCGGTGTGCGCTTAAAGGGCGCATCCATTG<br>TGTTACGTCGCTCGGCATTGAGTATCTGCGCACCATGAGCTTTATTTGGTGATCGTGTGCGTAG<br>TACAGTTCACCGAAATGGTGGTGCACAAAACAGTCCGACACTCTATCGCTGCTGGGCATTTTCC<br>TGCCACTCATCACCAACTGTGCGGTATTAGGGGTTGCGCTGCTCAACATCAACGAAAAATCACA<br>ACTTTATTCAATCGATCATTTATGGTTTTGGCGCTGCTGTTGGCTTCTCGCTGGTGTCTATTGTT<br>GCTTCAATGCGTGAGCGAATCCATGTAGCCGATGTCGCCGCTCCCTTTAAGGGCGCATCCATTGCG<br>ATGATCACCGCAGGTTAATGTCTTTGGCCTTTATGGGCTTTACCGGATTGGTGAAGTGGCTAGC<br>AAAGGAGAAGAACTTTCACTGGAGTTGTCCCAATCTTGTGAATTAGATGGTGTGTTAATGG<br>GCACAAATTTTCTGTCAAGTGGAGAGGGTGAAGGTGATGTACATACGAAAGCTTACCCTTAAAT<br>TTATTTGCACTACTGAAAACTACCTGTTCCATGGCCAACACTTGTCACTACTTTGACCTATGGTGT<br>TCAATGCTTTTCCGTTATCCGGATCATATGAAACGGCATGACTTTTCAAGAGTGCCATGCCGCA<br>AGGTTATGTACAGGAACGCACTATATCTTTCAAAGATGACGGGAACTACAAGACGCGTGTGAAG<br>TCAAGTTTGAAGGTGATACCCTTGTAAATCGTATCGAGTAAAAGGTATTGATTTTAAAGAAGATG<br>GAAACATTCTCGGACACAACTCGAGTACAACATAAATCAACACATGTATACATCACGGCAGACA<br>AACAAAAGAAATGGAATCAAAGTAACTTCAAAAATCGCCACAACATTGAAGATGGAGGGCTTCAA<br>CTAGCAGACCATTATCAACAAAATACTCCAATTGGCGATGGCCCTGCTCTTTACCAGACAACCAAT<br>ACCTGTGACACAATCTGCCCTTTCGAAAGATCCCAACGAAAAGCGTGACCCATGGTCTCTTCTTG<br>AGTTTGAAGTGTGCTGGGATTACACATGGCATGGATGAGCTCTACAATAA  |
| <b>R975</b> | P <sub>trc</sub> -gfpTAC        | GAGCTGTTGACAATTAATCATCCGGCTCGTATAATGTGTGGAATTGTGAGCGGATAACAATTTAC<br>ACAGGAAACACATATGCGTAAAGGAGAAGAACTTTTCACTGGAGTTGTCCCAATTTCTGTTGAATT<br>AGATGGTGATGTTAATGGGCACAAATTTTCTGTCAGTGGAGAGGGTGAAGGTGATGCAACATAC<br>GGAAAATTTACCCTTAAATTTATTTGCACTACTGAAAACTACCTGTTCCATGGCCAACACTTGTCA<br>CTACTTTGCGTTACGGTGTCAATGCTTTGCGAGATACCAGATCATATGAAACAGCATGACTTTTT<br>CAAGAGTGCATGCCGGAAGGTTACGTACAGGAAAGAACTATATTTTCAAAGATGACGGGAACT<br>ACAAGACACGTGCTGAAGTCAAGTTTGAAGGTGATACCCTTGTAAATGAAATCGAGTAAAAGGT<br>ATTGATTTTAAAGAAGATGGAACATTCTTGGACACAAATGGAATACAACACTACAACATCACACAAT<br>GTATACATCATGGCAGACAAAACAAAAGAAATGGAATCAAAGTAACTTCAAAAATAGACACAACAT<br>TGAAGATGGAAGCGTTCAACTAGCAGACCATTACAACAAAATACTCCAATTGGCGATGGCCCTG<br>TCCTTTTACCAGACAACCATTACCTGTCCACACAATCTGCCCTTTCGAAAGATCCCAACGAAAAGA<br>GAGACCACATGGTCTCTTGTGAGTTGTAACAGCTGCTGGGATTACACATGGCATGGATGAACATA<br>ACAATAA                                                                                                                                                                                                                                                                                                                                                                                                                                                                                                                                                                                                       |
| <b>R974</b> | P <sub>trc</sub> -gfpTAT        | GAGCTGTTGACAATTAATCATCCGGCTCGTATAATGTGTGGAATTGTGAGCGGATAACAATTTAC<br>ACAGGAAACACATATGCGTAAAGGAGAAGAACTTTTCACTGGAGTTGTCCCAATTTCTGTTGAATT<br>AGATGGTGATGTTAATGGGCACAAATTTTCTGTCAGTGGAGAGGGTGAAGGTGATGCAACATAT<br>GGAAAATTTACCCTTAAATTTATTTGCACTACTGAAAACTACCTGTTCCATGGCCAACACTTGTCA<br>CTACTTTGCGTTATGGTGTCAATGCTTTGCGAGATACCAGATCATATGAAACAGCATGACTTTTT<br>CAAGAGTGCATGCCGGAAGGTTACGTACAGGAAAGAACTATATTTTCAAAGATGACGGGAACT<br>ATAAGACACGTGCTGAAGTCAAGTTTGAAGGTGATACCCTTGTAAATGAAATCGAGTAAAAGGT<br>ATTGATTTTAAAGAAGATGGAACATTCTTGGACACAAATGGAATACAACACTACAACATCACACAAT<br>GTATATCATGGCAGACAAAACAAAAGAAATGGAATCAAAGTAACTTCAAAAATAGACACAACAT<br>TGAAGATGGAAGCGTTCAACTAGCAGACCATTACAACAAAATACTCCAATTGGCGATGGCCCTG<br>TCCTTTTACCAGACAACCATTACTGTCCACACAATCTGCCCTTTCGAAAGATCCCAACGAAAAGAG<br>AGACCACATGGTCTCTTGTGAGTTGTAACAGCTGCTGGGATTACACATGGCATGGATGAACATA<br>AAATAA                                                                                                                                                                                                                                                                                                                                                                                                                                                                                                                                                                                                           |

|                                                                  |            |                                               |                                                                                                                                |
|------------------------------------------------------------------|------------|-----------------------------------------------|--------------------------------------------------------------------------------------------------------------------------------|
| <b>plasmid strain (WT/<math>\Delta</math>tgt)</b>                | <b>in</b>  | codon replacement                             | introduction of point mutation in circular pTOPO-TA (kanamycin R) by PCR using primers :                                       |
| <b>N509/N511</b>                                                 |            | bla wt                                        | Tyr103TAC Asp129GAT                                                                                                            |
| <b>N512/N514</b>                                                 |            | bla Tyr103TAC > Tyr TAT synonymous            | ZIP555 GACTTGGTTGAGTATTACCAGTCACAGAAAAGC<br>ZIP556 TCTGTGACTGGTGAATACTCAACCAAGTCATTCTGAGAATAG                                  |
| <b>plasmid strain TOP10 Q282</b>                                 | <b>in</b>  | primers for transcriptional fusion PrsxA-gfp  |                                                                                                                                |
|                                                                  |            | ZIP796                                        | GGATACAAAAAGTAAACCC                                                                                                            |
|                                                                  |            | ZIP812                                        | CTCCTTTACGCATAGTTATATAAATGTTTGCTCCGATCCCGGCATTATCCTG                                                                           |
|                                                                  |            | ZIP813                                        | CAGGATAATGCCGGATCGGAAGCAAACATTATATAACTATGCGTAAAGGAG                                                                            |
|                                                                  |            | ZIP200                                        | TATCAAGCTTATTTGTATAGTTCATCCATGCC                                                                                               |
| <b>target for amplification</b>                                  | <b>for</b> | primers for q-RT-PCR tRNAs                    |                                                                                                                                |
| <b>tRNATyr</b>                                                   |            | ZIP719                                        | GGAGGGGTTCCCGAGTGG                                                                                                             |
|                                                                  |            | ZIP720                                        | GGTGGAGGGGACGGATT                                                                                                              |
| <b>tRNAAsp</b>                                                   |            | ZIP721                                        | GGAGCGGTAGTTCAGTCG                                                                                                             |
|                                                                  |            | ZIP722                                        | TGGCGGAGCGGACGGGAC                                                                                                             |
| <b>tRNAHis</b>                                                   |            | ZIP723                                        | GTGGCTATAGCTCAGTTG                                                                                                             |
|                                                                  |            | ZIP724                                        | TGGGGTGGCTAATGG                                                                                                                |
| <b>tRNAAsn</b>                                                   |            | ZIP725                                        | TCCTCCTTAGCTCAGTCGG                                                                                                            |
|                                                                  |            | ZIP726                                        | TGGCTCCTCTGCTGG                                                                                                                |
| <b>gyrA</b>                                                      |            | gyrA_F<br>gyrA_R                              | AAT GTG CTG GGC AAC GAC TG<br>GAG CCA AAG TTA CCT TGG CC                                                                       |
| <b>target for amplification</b>                                  | <b>for</b> | primers for digital-RT-PCR fluorescent probes |                                                                                                                                |
| <b>tgt</b>                                                       |            |                                               | fwd CAA CAC CAC TGG ATC CTC ATT<br>rev GGT AGT AAC GCA GGT TAT GG<br>5' - [FAM] A CCT GCA TCA TCT GGA TCG CTG TAA - 3' [BHQ2]  |
| <b>rsxA</b>                                                      |            |                                               | fwd TCA CGC ATT GAA GCG AAC<br>rev CAC CAA CTG TGC GGT ATT AG<br>5' - [FAM] A GCG CCA AAA CCA TAA ATG ATC GAT - 3' [BHQ2]      |
| <b>gyrA</b>                                                      |            |                                               | fwd AAT GTG CTG GGC AAC GAC TG<br>rev GAG CCA AAG TTA CCT TGG CC<br>5' - [CY5] - CAC CCT CAT GGT GAC AGT GCG GTT T - 3' [BHQ2] |
| <b>Strains</b>                                                   |            |                                               |                                                                                                                                |
| <b><i>V. cholerae</i></b>                                        |            | strain #                                      | reference                                                                                                                      |
| <b>N16961 hapR+</b>                                              |            | F606                                          | laboratory collection                                                                                                          |
| <b>N16961 hapR+ <math>\Delta</math>lacZ</b>                      |            | K329                                          | Babosan et al, 2022                                                                                                            |
| <b><math>\Delta</math>tgt::spec</b>                              |            | J420                                          | Babosan et al, 2022                                                                                                            |
| <b><math>\Delta</math>tolA::kan</b>                              |            | J983                                          | Negro et al, 2019                                                                                                              |
| <b><math>\Delta</math>crp::kan</b>                               |            | Q081                                          | Deletion of <i>crp</i> in F606 as described in Lang et al, 2021                                                                |
| <b><math>\Delta</math>rluF::kan</b>                              |            | M567                                          | Babosan et al, 2022                                                                                                            |
| <b><math>\Delta</math>rluF::kan <math>\Delta</math>tgt::spec</b> |            | M569                                          | Deletion of <i>rluF</i> in J420, as described for deletion of <i>rluF</i> in WT in Babosan et al, 2022                         |
| <b><i>E. coli</i></b>                                            |            | strain #                                      | construction                                                                                                                   |
| <b>MG1655</b>                                                    |            | C349                                          | laboratory collection                                                                                                          |
| <b><math>\Delta</math>tgt::kan</b>                               |            | J233                                          | P1 transduction of <i>tgt::kan</i> from Keio collection into MG1655                                                            |
| <b><math>\Delta</math>tgt</b>                                    |            | R181                                          | Kanamycin resistance cassette was removed using the FLP/FRT system (Zhu et al, 1995)                                           |
| <b><math>\Delta</math>rsxA::kan</b>                              |            | R207                                          | P1 transduction of <i>tgt::kan</i> from Keio collection into MG1655                                                            |
| <b><math>\Delta</math>tgt <math>\Delta</math>rsxA::kan</b>       |            | R223                                          | P1 transduction of <i>rsxA::kan</i> from Keio collection into R181 <i><math>\Delta</math>tgt</i>                               |

1757

1758

1759
